# Supplementary material for: Modular synthesis of unsymmetric 2,4-diaryl-substituted pyridines through a four-component cyclization strategy under metal-free conditions
Source: Royal Society of Chemistry journal article supplement (doi:10.1039/d3qo00891f), 2023-01-01

## Supporting Information

# Modular synthesis of unsymmetrical 2,4-diaryl substituted pyridines through four-component cyclization strategy under metal-free conditions

Yanfeng Ma,<sup>a</sup> Tianci Xu,<sup>a</sup> Fuhong Xiao,<sup>a,\*</sup> Guojiang Mao<sup>b</sup> and Guo-Jun Deng<sup>a,\*</sup>

<sup>a</sup> Key Laboratory of Environmentally Friendly Chemistry and Application of Ministry of Education, Hunan Province Key Laboratory of Green Organic Synthesis and Application, College of Chemistry, Xiangtan University, Xiangtan 411105, China.

\*E-mail: fhxiao@xtu.edu.cn; [gjdeng@xtu.edu.cn](mailto:gjdeng@xtu.edu.cn).

<sup>b</sup> School of Chemistry and Chemical Engineering, Henan Normal University, Xinxiang, 453007, P. R. China

### Table of Contents

|                                                                                   |              |
|-----------------------------------------------------------------------------------|--------------|
| <b>1. General information</b>                                                     | <b>2</b>     |
| <b>2. General procedure</b>                                                       | <b>2</b>     |
| <b>3. Synthetic Transformation of Product 3aa</b>                                 | <b>2-3</b>   |
| <b>4. Analytical data for the compounds prepared</b>                              | <b>4-19</b>  |
| <b>5. References</b>                                                              | <b>19</b>    |
| <b>6. Copies of <sup>1</sup>H and <sup>13</sup>C NMR spectra for all products</b> | <b>20-61</b> |

## 1. General information

All reactions were carried out under an atmosphere of oxygen unless otherwise noted. Column chromatography was performed using silica gel (200-300 mesh).  $^1\text{H}$  NMR and  $^{13}\text{C}$  NMR spectra were recorded on Bruker-AV (400 and 100 MHz, respectively) instrument using  $\text{CDCl}_3$  as solvent and TMS as an internal standard. Mass spectra were measured on Agilent 5975 GC-MS instrument (EI). High-resolution mass spectra (HRMS) was performed on Agilent 6230 TOF LC/MS. The structures of known compounds were further corroborated by comparing their  $^1\text{H}$  NMR,  $^{13}\text{C}$  NMR data and MS data with those of literature. Most reagents were obtained from commercial suppliers and used without further purification.

## 2. General procedure

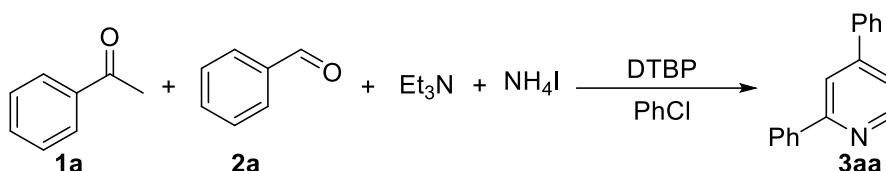

A 10 mL reaction vessel was charged with acetophenone (**1a**, 0.2 mmol), benzaldehyde (**2a**, 0.4 mmol),  $\text{Et}_3\text{N}$  (0.6 mmol),  $\text{NH}_4\text{I}$  (0.6 mmol), DTBP (0.4 mmol), PhCl (2.0 mL) under air. The reaction vessel was stirred at  $150\text{ }^\circ\text{C}$  for 24 h. After cooling to room temperature, the combined organic layer was dried over magnesium sulfate and the volatiles were removed under reduced pressure. The residue was purified by column chromatography on silica gel (petroleum ether/ethyl acetate = 40:1) to give the desired product **3aa** as yellow oil, 30.0 mg, yield 65%.

## 3. Synthetic Transformation of Product 3aa

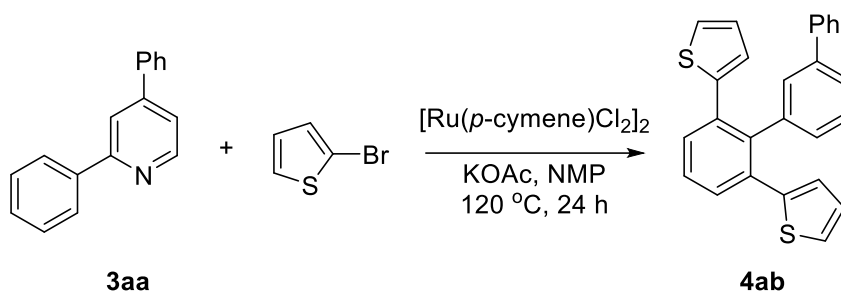

A 10 mL reaction vessel was charged with acetophenone 2,4-diphenylpyridine (0.2 mmol), 2-bromothiophene (2.5 equiv),  $[\text{Ru}(p\text{-cymene})\text{Cl}_2]_2$  (2.5 mol %), KOAc (3 equiv), NMP (0.6 mL). The reaction vessel was stirred at  $120\text{ }^\circ\text{C}$  for 24 h. After cooling to room temperature, the mixture was diluted with water (30 mL) and then extracted by EtOAc (10 mL $\times$ 3). The combined organic phases were dried over anhydrous  $\text{Na}_2\text{SO}_4$ , filtered, concentrated in vacuo and the crude product was obtained. Purified directly by flash column chromatography

(on silica gel, petroleum ether/EtOAc = 20:1) to give a yellow oil (59 mg, 75% yield).

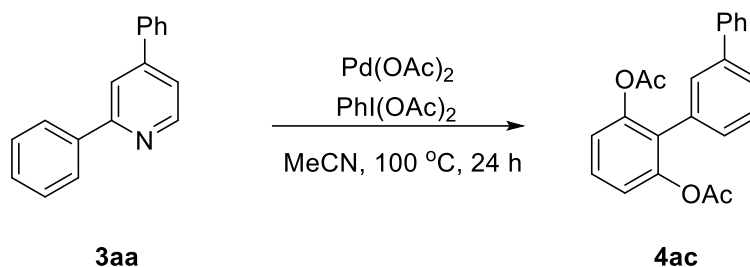

A 10 mL reaction vessel was charged with acetophenone 2,4-diphenylpyridine (0.2 mmol), *p*-xylene (2 mmol, 10 equiv.), Ir[dF(CF<sub>3</sub>)ppy]<sub>2</sub>(dtbbpy)PF<sub>6</sub> (2 mol%), NH<sub>4</sub>Br (0.5 equiv.), H<sub>2</sub>O (10 equiv.), acetone (3 mL), at 35 °C under O<sub>2</sub> atmosphere (sealed tube) and 35 W blue LED irradiation for 20 h. After the reaction was complete, the mixture was diluted with water (30 mL) and then extracted by EtOAc (10 mL×3). The combined organic phases were dried over anhydrous Na<sub>2</sub>SO<sub>4</sub>, filtered, concentrated in vacuo and the crude product was obtained. Purified directly by flash column chromatography (on silica gel, petroleum ether/EtOAc = 20:1) to give a colorless oil (46 mg, 67% yield).

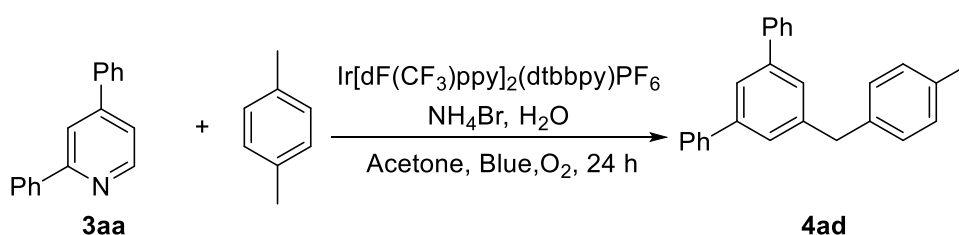

A 10 mL reaction vessel was charged with acetophenone 2,4-diphenylpyridine (0.2 mmol), *p*-xylene (2 mmol, 10 equiv.), Ir[dF(CF<sub>3</sub>)ppy]<sub>2</sub>(dtbbpy)PF<sub>6</sub> (2 mol%), NH<sub>4</sub>Br (0.5 equiv.), H<sub>2</sub>O (10 equiv.), acetone (3 mL), at 35 °C under O<sub>2</sub> atmosphere (sealed tube) and 35 W blue LED irradiation for 20 h. After the reaction was complete, the mixture was diluted with water (30 mL) and then extracted by EtOAc (10 mL×3). The combined organic phases were dried over anhydrous Na<sub>2</sub>SO<sub>4</sub>, filtered, concentrated in vacuo and the crude product was obtained. Purified directly by flash column chromatography (on silica gel, petroleum ether/EtOAc = 20:1) to give a colorless oil (41 mg, 61% yield).

#### 4. Analytical data for the compounds prepared

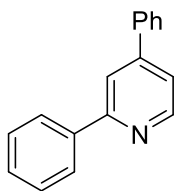

##### **2,4-Diphenylpyridine (3aa, CAS: 26274-35-1)<sup>1</sup>**

Purified directly by flash column chromatography (on silica gel, petroleum ether/EtOAc = 20:1) to give a yellow oil (30.0 mg, 65% yield). <sup>1</sup>H NMR (400 MHz, CDCl<sub>3</sub>) δ 8.74 (d, *J* = 5.1 Hz, 1H), 8.10 – 8.02 (m, 2H), 7.93 (d, *J* = 1.6 Hz, 1H), 7.70 (d, *J* = 7.3 Hz, 2H), 7.54 – 7.43 (m, 7H). <sup>13</sup>C NMR (100 MHz, CDCl<sub>3</sub>) δ 158.1, 150.1, 149.3, 139.5, 138.5, 129.1, 129.0, 129.0, 128.7, 127.1, 127.0, 120.2, 118.8.

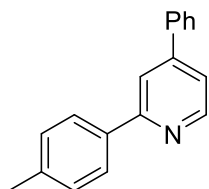

##### **4-Phenyl-2-(*p*-tolyl)pyridine (3ba)<sup>1</sup>**

Purified directly by flash column chromatography (on silica gel, petroleum ether/EtOAc = 20:1) to give a yellow oil (32.8 mg, 67% yield). <sup>1</sup>H NMR (400 MHz, CDCl<sub>3</sub>) δ 8.71 (d, *J* = 5.1 Hz, 1H), 7.97 – 7.89 (m, 3H), 7.72 – 7.66 (m, 2H), 7.53 – 7.45 (m, 3H), 7.43 – 7.40 (m, 1H), 7.30 (d, *J* = 7.9 Hz, 2H), 2.42 (s, 3H). <sup>13</sup>C NMR (100 MHz, CDCl<sub>3</sub>) δ 158.0, 150.0, 149.2, 139.0, 138.6, 136.6, 129.5, 129.1, 129.0, 127.0, 126.8, 119.9, 118.4, 21.3.

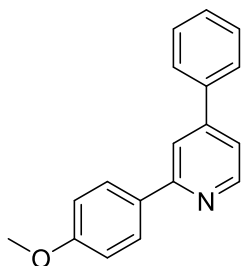

##### **2-(4-Methoxyphenyl)-4-phenylpyridine (3ca)<sup>1</sup>**

Purified directly by flash column chromatography (on silica gel, petroleum ether/EtOAc = 10:1) to give a yellow solid (33.4 mg, 64% yield). Mp: 60-62 °C. <sup>1</sup>H NMR (400 MHz, CDCl<sub>3</sub>) δ 8.69 (d, *J* = 5.2 Hz, 1H), 8.05 – 7.98 (m, 2H), 7.87 (d, *J* = 1.7 Hz, 1H), 7.72 – 7.67 (m, 2H), 7.53 – 7.45 (m, 3H), 7.41 – 7.38 (m, 1H), 7.06 – 7.00 (m, 2H), 3.87 (s, 3H). <sup>13</sup>C NMR (100 MHz, CDCl<sub>3</sub>) δ 160.5, 157.7, 149.9, 149.2, 138.7, 132.1, 129.1, 128.9, 128.3, 127.0, 119.6, 118.0, 114.1, 55.3.

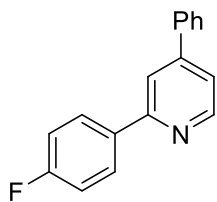

### 2-(4-Fluorophenyl)-4-phenylpyridine (3da)<sup>1</sup>

Purified directly by flash column chromatography (on silica gel, petroleum ether/EtOAc = 20:1) to give a yellow oil (28.4 mg, 57% yield). <sup>1</sup>H NMR (400 MHz, CDCl<sub>3</sub>) δ 8.71 (d, *J* = 5.1 Hz, 1H), 8.09 – 8.00 (m, 2H), 7.87 (s, 1H), 7.68 (d, *J* = 7.1 Hz, 2H), 7.53 – 7.41 (m, 4H), 7.17 (t, *J* = 8.4 Hz, 2H). <sup>13</sup>C NMR (100 MHz, CDCl<sub>3</sub>) δ 163.5 (d, *J* = 246.9 Hz), 156.9, 150.0, 149.3, 138.3, 135.5 (d, *J* = 3.1 Hz), 129.1, 129.0, 128.8 (d, *J* = 8.3 Hz), 127.0, 120.1, 118.3, 115.6 (d, *J* = 21.5 Hz).

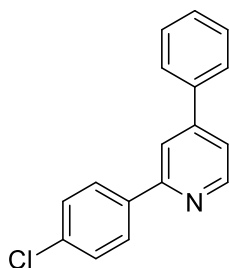

### 2-(4-Chlorophenyl)-4-phenylpyridine (3ea)<sup>1</sup>

Purified directly by flash column chromatography (on silica gel, petroleum ether/EtOAc = 20:1) to give a yellow oil (27.3 mg, 51% yield). <sup>1</sup>H NMR (400 MHz, CDCl<sub>3</sub>) δ 8.72 (d, *J* = 5.2 Hz, 1H), 8.00 (d, *J* = 8.1 Hz, 2H), 7.89 (s, 1H), 7.68 (d, *J* = 7.4 Hz, 2H), 7.54 – 7.44 (m, 6H). <sup>13</sup>C NMR (100 MHz, CDCl<sub>3</sub>) δ 156.8, 150.1, 149.4, 138.3, 137.8, 135.1, 129.1, 128.9, 128.3, 127.0, 120.5, 118.5.

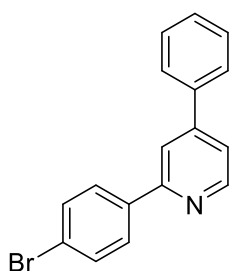

### 2-(4-Bromophenyl)-4-phenylpyridine (4fa)<sup>1</sup>

Purified directly by flash column chromatography (on silica gel, petroleum ether/EtOAc = 20:1) to give a yellow solid (26.6 mg, 43% yield). Mp: 80-82 °C. <sup>1</sup>H NMR (400 MHz, CDCl<sub>3</sub>) δ 8.73 (d, *J* = 5.0 Hz, 1H), 7.97 – 7.89 (m, 3H), 7.74 – 7.60 (m, 4H), 7.56 – 7.43 (m, 4H). <sup>13</sup>C NMR (100 MHz, CDCl<sub>3</sub>) δ 156.8, 150.1, 149.6, 138.3, 138.3, 131.9, 129.2, 129.2, 128.6, 127.1, 123.6, 120.6, 118.5.

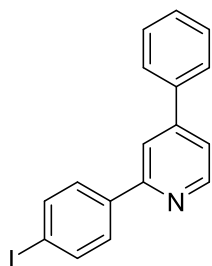

### 2-(4-Iodophenyl)-4-phenylpyridine (3ga)<sup>1</sup>

Purified directly by flash column chromatography (on silica gel, petroleum ether/EtOAc = 20:1) to give a yellow solid (25.7 mg, 36% yield). Mp: 88-90 °C. <sup>1</sup>H NMR (400 MHz, CDCl<sub>3</sub>) δ 8.73 (d, *J* = 4.7 Hz, 1H), 7.94 – 7.78 (m, 5H), 7.69 (d, *J* = 7.2 Hz, 2H), 7.59 – 7.40 (m, 4H). <sup>13</sup>C NMR (100 MHz, CDCl<sub>3</sub>) δ 156.9, 150.2, 149.5, 138.9, 138.3, 137.9, 129.1, 128.7, 127.1, 120.6, 118.4, 95.4.

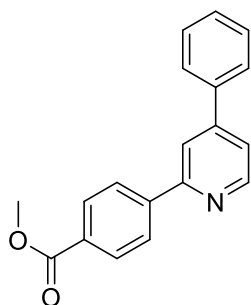

### Methyl 4-(4-phenylpyridin-2-yl)benzoate (3ha)

Purified directly by flash column chromatography (on silica gel, petroleum ether/EtOAc = 10:1) to give a yellow solid (30.6 mg, 53% yield). Mp: 118-120 °C. <sup>1</sup>H NMR (400 MHz, CDCl<sub>3</sub>) δ 8.77 (d, *J* = 5.1 Hz, 1H), 8.19 – 8.10 (m, 4H), 7.98 (d, *J* = 1.7 Hz, 1H), 7.74 – 7.68 (m, 2H), 7.56 – 7.47 (m, 4H), 3.96 (s, 3H). <sup>13</sup>C NMR (100 MHz, CDCl<sub>3</sub>) δ 166.9, 156.7, 150.2, 149.6, 143.5, 138.2, 130.4, 130.1, 129.2, 129.2, 127.1, 127.0, 121.0, 119.2, 52.2. HRMS (ESI) *m/z* calcd. for C<sub>19</sub>H<sub>16</sub>NO<sub>2</sub><sup>+</sup> (M+H)<sup>+</sup> 290.1176, found 290.1185.

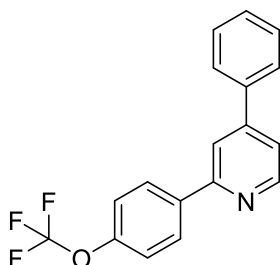

### 4-Phenyl-2-(4-(trifluoromethoxy)phenyl)pyridine (3ia)

Purified directly by flash column chromatography (on silica gel, petroleum ether/EtOAc = 20:1) to give a yellow oil (29.6 mg, 47% yield). <sup>1</sup>H NMR (400 MHz, CDCl<sub>3</sub>) δ 8.73 (d, *J* = 5.1 Hz, 1H), 8.11 – 8.04 (m, 2H), 7.90 (d, *J*

= 1.7 Hz, 1H), 7.72 – 7.66 (m, 2H), 7.54 – 7.46 (m, 4H), 7.34 (d,  $J = 8.4$  Hz, 2H).  $^{13}\text{C}$  NMR (100 MHz,  $\text{CDCl}_3$ )  $\delta$  156.6, 150.2, 149.9, 149.5, 138.3, 138.1, 129.2, 128.7, 128.5, 127.0, 121.1, 120.6, 118.6. HRMS (ESI)  $m/z$  calcd. for  $\text{C}_{18}\text{H}_{13}\text{F}_3\text{NO}^+$  ( $\text{M}+\text{H}$ ) $^+$  316.0944, found 316.0948.

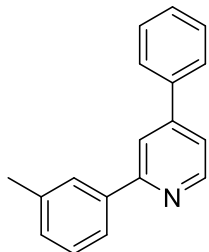

#### 4-Phenyl-2-(*m*-tolyl)pyridine (3ja)

Purified directly by flash column chromatography (on silica gel, petroleum ether/EtOAc = 20:1) to give a yellow oil (26.4 mg, 54% yield).  $^1\text{H}$  NMR (400 MHz,  $\text{CDCl}_3$ )  $\delta$  8.73 (d,  $J = 5.1$  Hz, 1H), 7.95 – 7.87 (m, 2H), 7.82 (d,  $J = 7.8$  Hz, 1H), 7.72 – 7.65 (m, 2H), 7.53 – 7.43 (m, 4H), 7.39 (t,  $J = 7.6$  Hz, 1H), 7.27 – 7.24 (m, 1H), 2.46 (s, 3H).  $^{13}\text{C}$  NMR (100 MHz,  $\text{CDCl}_3$ )  $\delta$  158.2, 150.0, 149.2, 139.4, 138.5, 138.4, 129.8, 129.1, 129.0, 128.6, 127.7, 127.1, 124.1, 120.2, 118.8, 21.5. HRMS (ESI)  $m/z$  calcd. for  $\text{C}_{18}\text{H}_{16}\text{N}^+$  ( $\text{M}+\text{H}$ ) $^+$  246.1277, found 246.1280.

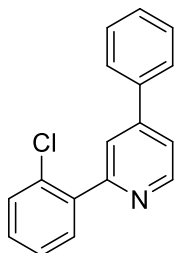

#### 2-(2-Chlorophenyl)-4-phenylpyridine (3ka)<sup>1</sup>

Purified directly by flash column chromatography (on silica gel, petroleum ether/EtOAc = 20:1) to give a yellow solid (15.4 mg, 29% yield). Mp: 58-60 °C.  $^1\text{H}$  NMR (400 MHz,  $\text{CDCl}_3$ )  $\delta$  8.77 (d,  $J = 5.1$  Hz, 1H), 7.88 (s, 1H), 7.73 – 7.63 (m, 3H), 7.55 – 7.42 (m, 5H), 7.41 – 7.33 (m, 2H).  $^{13}\text{C}$  NMR (100 MHz,  $\text{CDCl}_3$ )  $\delta$  157.3, 149.9, 148.3, 139.2, 138.1, 132.2, 131.5, 130.1, 129.6, 129.1, 129.1, 127.1, 127.0, 122.9, 120.4.

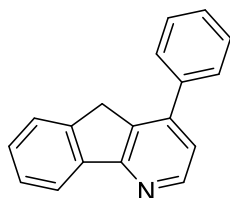

#### 4-Phenyl-5*H*-indeno[1,2-*b*]pyridine (3ma)

Purified directly by flash column chromatography (on silica gel, petroleum ether/EtOAc = 20:1) to give a yellow solid (30.6 mg, 63% yield). Mp: 93-95 °C.  $^1\text{H}$  NMR (400 MHz,  $\text{CDCl}_3$ )  $\delta$  8.66 (d,  $J = 5.2$  Hz, 1H), 8.16 (d,  $J =$

7.5 Hz, 1H), 7.65 – 7.59 (m, 2H), 7.57 – 7.50 (m, 3H), 7.48 – 7.40 (m, 3H), 7.27 – 7.23 (m, 1H), 3.99 (s, 2H). <sup>13</sup>C NMR (100 MHz, CDCl<sub>3</sub>) δ 160.8, 148.7, 146.0, 143.7, 140.7, 138.4, 134.3, 128.8, 128.8, 128.6, 128.2, 127.3, 125.0, 121.1, 120.9, 34.5. HRMS (ESI) m/z calcd. for C<sub>18</sub>H<sub>14</sub>NO<sup>+</sup> (M+H)<sup>+</sup> 244.1121, found 244.1125.

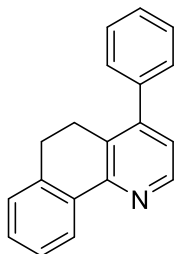

### 4-Phenyl-5,6-dihydrobenzo[*h*]quinoline (3na)<sup>1</sup>

Purified directly by flash column chromatography (on silica gel, petroleum ether/EtOAc = 20:1) to give a white solid (32.3 mg, 62% yield). Mp: 100-102 °C. <sup>1</sup>H NMR (400 MHz, CDCl<sub>3</sub>) δ 8.58 (d, *J* = 4.9 Hz, 1H), 8.37 (d, *J* = 7.5 Hz, 1H), 7.51 – 7.30 (m, 7H), 7.26 – 7.20 (m, 1H), 7.14 (d, *J* = 4.9 Hz, 1H), 2.94 – 2.89 (m, 2H), 2.85 – 2.81 (m, 2H). <sup>13</sup>C NMR (100 MHz, CDCl<sub>3</sub>) δ 153.0, 148.6, 147.1, 138.9, 138.1, 134.8, 129.5, 129.1, 128.7, 128.4, 128.0, 127.5, 127.1, 125.5, 123.3, 28.0, 25.4.

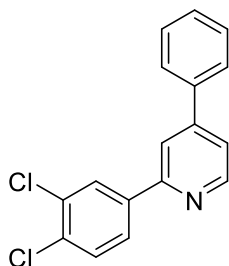

### 2-(3,4-Dichlorophenyl)-4-phenylpyridine (3oa)<sup>1</sup>

Purified directly by flash column chromatography (on silica gel, petroleum ether/EtOAc = 20:1) to give a yellow solid (22.8 mg, 38% yield). Mp: 96-98 °C. <sup>1</sup>H NMR (400 MHz, CDCl<sub>3</sub>) δ 8.73 (d, *J* = 5.1 Hz, 1H), 8.18 (d, *J* = 2.1 Hz, 1H), 7.92 – 7.85 (m, 2H), 7.72 – 7.66 (m, 2H), 7.57 – 7.47 (m, 5H). <sup>13</sup>C NMR (100 MHz, CDCl<sub>3</sub>) δ 155.5, 150.2, 149.7, 139.3, 138.1, 133.2, 133.1, 130.7, 129.3, 129.2, 128.9, 127.1, 126.1, 120.9, 118.5.

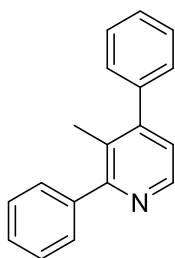

### 3-Methyl-2,4-diphenylpyridine (3pa)<sup>1</sup>



Purified directly by flash column chromatography (on silica gel, petroleum ether/EtOAc = 20:1) to give a yellow oil (28.9 mg, 58% yield). <sup>1</sup>H NMR (400 MHz, CDCl<sub>3</sub>) δ 8.55 (d, *J* = 4.8 Hz, 1H), 7.55 (d, *J* = 7.4 Hz, 2H), 7.49 – 7.35 (m, 8H), 7.14 (d, *J* = 4.8 Hz, 1H), 2.21 (s, 3H). <sup>13</sup>C NMR (100 MHz, CDCl<sub>3</sub>) δ 159.7, 150.8, 146.3, 141.0, 139.8, 129.0, 128.6, 128.4, 128.3, 128.1, 127.8, 123.1, 17.93.

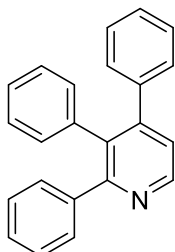

### 2,3,4-Triphenylpyridine (3qa)<sup>1</sup>

Purified directly by flash column chromatography (on silica gel, petroleum ether/EtOAc = 20:1) to give a white solid (31.9 mg, 52% yield). Mp: 174-176 °C. <sup>1</sup>H NMR (400 MHz, CDCl<sub>3</sub>) δ 8.73 (d, *J* = 4.7 Hz, 1H), 7.35 (d, *J* = 4.8 Hz, 1H), 7.30 – 7.24 (m, 3H), 7.23 – 7.17 (m, 5H), 7.14 – 6.97 (m, 5H), 6.88 (d, *J* = 6.1 Hz, 2H). <sup>13</sup>C NMR (100 MHz, CDCl<sub>3</sub>) δ 158.4, 149.9, 148.2, 140.7, 139.4, 137.7, 134.4, 131.3, 129.8, 129.3, 127.9, 127.7, 127.6, 127.3, 127.3, 126.6, 123.6.

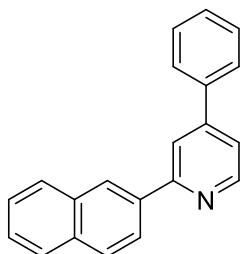

### 2-(Naphthalen-2-yl)-4-phenylpyridine (3ra)<sup>2</sup>

Purified directly by flash column chromatography (on silica gel, petroleum ether/EtOAc = 20:1) to give a yellow oil (31.4 mg, 56% yield). <sup>1</sup>H NMR (400 MHz, CDCl<sub>3</sub>) δ 8.79 (d, *J* = 5.1 Hz, 1H), 8.54 (d, *J* = 1.8 Hz, 1H), 8.24 – 8.18 (m, 1H), 8.07 (d, *J* = 1.6 Hz, 1H), 7.97 (d, *J* = 8.8 Hz, 2H), 7.90 – 7.86 (m, 1H), 7.76 – 7.71 (m, 2H), 7.55 – 7.46 (m, 6H). <sup>13</sup>C NMR (100 MHz, CDCl<sub>3</sub>) δ 157.9, 150.2, 149.4, 138.5, 136.7, 133.6, 133.5, 129.1, 129.1, 128.7, 128.5, 127.6, 127.1, 126.5, 126.4, 126.3, 124.6, 120.3, 119.0.

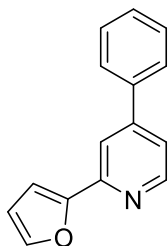

### 2-(Furan-2-yl)-4-phenylpyridine (3sa)<sup>1</sup>

Purified directly by flash column chromatography (on silica gel, petroleum ether/EtOAc = 20:1) to give a yellow oil (24.3mg, 55% yield). <sup>1</sup>H NMR (400 MHz, CDCl<sub>3</sub>) δ 8.64 (d, *J* = 5.1 Hz, 1H), 7.93 (s, 1H), 7.70 (d, *J* = 7.2 Hz, 2H), 7.58 – 7.43 (m, 4H), 7.39 (d, *J* = 4.1 Hz, 1H), 7.14 (d, *J* = 3.0 Hz, 1H), 6.57 (s, 1H). <sup>13</sup>C NMR (100 MHz, CDCl<sub>3</sub>) δ 153.5, 149.9, 149.7, 149.3, 143.4, 138.1, 129.2, 129.1, 127.0, 119.9, 116.6, 112.1, 109.0.

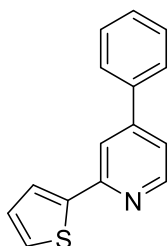

### 4-Phenyl-2-(thiophen-2-yl)pyridine (3ta)<sup>1</sup>

Purified directly by flash column chromatography (on silica gel, petroleum ether/EtOAc = 20:1) to give a yellow oil (27.5 mg, 58% yield). <sup>1</sup>H NMR (400 MHz, CDCl<sub>3</sub>) δ 8.61 (d, *J* = 5.0 Hz, 1H), 7.85 (s, 1H), 7.66 (d, *J* = 4.7 Hz, 3H), 7.54 – 7.39 (m, 4H), 7.35 (d, *J* = 4.8 Hz, 1H), 7.17 – 7.08 (m, 1H). <sup>13</sup>C NMR (100 MHz, CDCl<sub>3</sub>) δ 152.9, 149.8, 149.1, 144.7, 138.0, 129.0, 129.0, 127.9, 127.5, 126.8, 124.5, 119.9, 116.7.

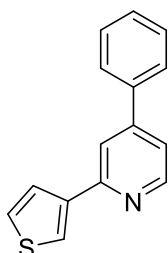

### 4-Phenyl-2-(thiophen-3-yl)pyridine (3ua)<sup>2</sup>

Purified directly by flash column chromatography (on silica gel, petroleum ether/EtOAc = 20:1) to give a black oil (26.5 mg, 56% yield). <sup>1</sup>H NMR (400 MHz, CDCl<sub>3</sub>) δ 8.66 (d, *J* = 5.1 Hz, 1H), 8.00 – 7.95 (m, 1H), 7.82 (d, *J* = 1.7 Hz, 1H), 7.74 – 7.66 (m, 3H), 7.53 – 7.46 (m, 3H), 7.43 – 7.38 (m, 2H). <sup>13</sup>C NMR (100 MHz, CDCl<sub>3</sub>) δ 153.9, 149.9, 149.3, 142.1, 138.4, 129.1, 129.1, 127.0, 126.4, 126.2, 123.7, 120.0, 118.4.

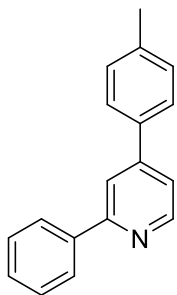

### 2-Phenyl-4-(*p*-tolyl)pyridine (3ab)<sup>3</sup>

Purified directly by flash column chromatography (on silica gel, petroleum ether/EtOAc = 20:1) to give a yellow oil (31.4 mg, 64% yield). <sup>1</sup>H NMR (400 MHz, CDCl<sub>3</sub>) δ 8.72 (d, *J* = 5.2 Hz, 1H), 8.04 (d, *J* = 7.6 Hz, 2H), 7.92 (d, *J* = 1.7 Hz, 1H), 7.60 (d, *J* = 7.9 Hz, 2H), 7.53 – 7.42 (m, 4H), 7.32 (d, *J* = 7.8 Hz, 2H), 2.43 (s, 3H). <sup>13</sup>C NMR (100 MHz, CDCl<sub>3</sub>) δ 158.0, 150.0, 149.1, 139.5, 139.2, 135.5, 129.8, 129.0, 128.7, 127.0, 126.9, 120.0, 118.5, 21.2.

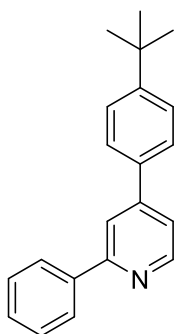

### 4-(4-(*tert*-Butyl)phenyl)-2-phenylpyridine (3ac)

Purified directly by flash column chromatography (on silica gel, petroleum ether/EtOAc = 20:1) to give a white solid (39.0 mg, 68% yield). Mp: 130-132 °C. <sup>1</sup>H NMR (400 MHz, CDCl<sub>3</sub>) δ 8.72 (d, *J* = 5.1 Hz, 1H), 8.07 – 8.00 (m, 2H), 7.94 – 7.90 (m, 1H), 7.65 (d, *J* = 8.2 Hz, 2H), 7.55 – 7.43 (m, 6H), 1.38 (s, 9H). <sup>13</sup>C NMR (100 MHz, CDCl<sub>3</sub>) δ 158.0, 152.3, 150.0, 149.1, 139.5, 135.5, 128.9, 128.7, 127.0, 126.7, 126.1, 120.1, 118.6, 34.7, 31.2. HRMS (ESI) *m/z* calcd. for C<sub>21</sub>H<sub>22</sub>N<sup>+</sup> (M+H)<sup>+</sup> 288.1747, found 288.1755.

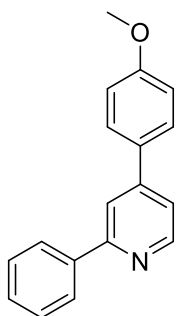

### 4-(4-Methoxyphenyl)-2-phenylpyridine (3ad)<sup>1</sup>

Purified directly by flash column chromatography (on silica gel, petroleum ether/EtOAc = 10:1) to give a yellow solid (28.7 mg, 55% yield). Mp: 73-75 °C. <sup>1</sup>H NMR (400 MHz, CDCl<sub>3</sub>) δ 8.71 (d, *J* = 4.8 Hz, 1H), 8.04 (d, *J* = 7.1 Hz, 2H), 7.90 (s, 1H), 7.67 (d, *J* = 8.4 Hz, 2H), 7.58 – 7.37 (m, 4H), 7.04 (d, *J* = 8.3 Hz, 2H), 3.88 (s, 3H). <sup>13</sup>C NMR (100 MHz, CDCl<sub>3</sub>) δ 160.5, 157.9, 149.9, 148.7, 139.5, 130.6, 128.9, 128.7, 128.2, 127.0, 119.6, 118.2, 114.5, 55.3.

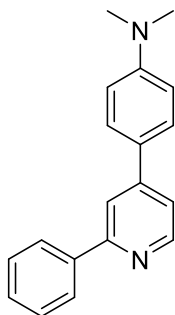

#### ***N,N*-Dimethyl-4-(2-phenylpyridin-4-yl)aniline (3ae)**

Purified directly by flash column chromatography (on silica gel, petroleum ether/EtOAc = 10:1) to give a yellow solid (18.6 mg, 34% yield). Mp: 112-114 °C. <sup>1</sup>H NMR (400 MHz, CDCl<sub>3</sub>) δ 8.66 (d, *J* = 5.3 Hz, 1H), 8.07 – 8.01 (m, 2H), 7.90 (d, *J* = 1.8 Hz, 1H), 7.67 – 7.62 (m, 2H), 7.52 – 7.48 (m, 2H), 7.45 – 7.41 (m, 2H), 6.84 – 6.80 (m, 2H), 3.04 (s, 6H). <sup>13</sup>C NMR (100 MHz, CDCl<sub>3</sub>) δ 157.7, 151.1, 149.6, 149.2, 139.6, 128.9, 128.7, 127.7, 127.0, 125.2, 119.0, 117.5, 112.4, 40.3. HRMS (ESI) *m/z* calcd. for C<sub>19</sub>H<sub>19</sub>N<sub>2</sub><sup>+</sup> (*M*+*H*)<sup>+</sup> 275.1543, found 275.1548.

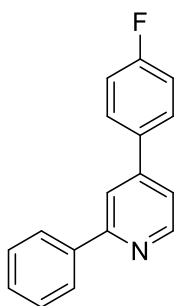

#### **4-(4-Fluorophenyl)-2-phenylpyridine (3af)<sup>1</sup>**

Purified directly by flash column chromatography (on silica gel, petroleum ether/EtOAc = 20:1) to give a yellow oil (28.3 mg, 57% yield). <sup>1</sup>H NMR (400 MHz, CDCl<sub>3</sub>) δ 8.73 (d, *J* = 5.0 Hz, 1H), 8.04 (d, *J* = 7.2 Hz, 2H), 7.88 (s, 1H), 7.71 – 7.63 (m, 2H), 7.53 – 7.38 (m, 4H), 7.28 – 7.12 (m, 2H). <sup>13</sup>C NMR (100 MHz, CDCl<sub>3</sub>) δ 163.3 (d, *J* = 247.6 Hz), 158.0, 150.0, 148.0, 139.2, 134.4 (d, *J* = 2.8 Hz), 129.0, 128.7 (d, *J* = 7.9 Hz), 128.6, 126.9, 119.9, 118.3, 116.0 (d, *J* = 21.5 Hz).

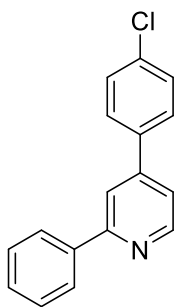

#### 4-(4-Chlorophenyl)-2-phenylpyridine (3ag)

Purified directly by flash column chromatography (on silica gel, petroleum ether/EtOAc = 20:1) to give a yellow oil (28.0 mg, 53% yield).  $^1\text{H}$  NMR (400 MHz,  $\text{CDCl}_3$ )  $\delta$  8.74 (d,  $J = 5.1$  Hz, 1H), 8.03 (d,  $J = 7.6$  Hz, 2H), 7.88 (s, 1H), 7.62 (d,  $J = 8.2$  Hz, 2H), 7.52 – 7.44 (m, 5H), 7.42 – 7.39 (m, 1H).  $^{13}\text{C}$  NMR (100 MHz,  $\text{CDCl}_3$ )  $\delta$  158.2, 150.2, 148.0, 139.2, 136.9, 135.2, 129.3, 129.1, 128.8, 128.3, 127.0, 120.0, 118.5. HRMS (ESI)  $m/z$  calcd. for  $\text{C}_{17}\text{H}_{13}\text{ClNO}^+$  ( $\text{M}+\text{H}$ ) $^+$  266.0731, found 266.0739.

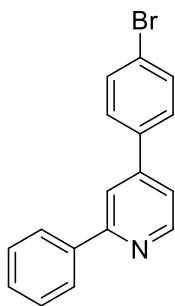

#### 4-(4-Bromophenyl)-2-phenylpyridine (3ah)

Purified directly by flash column chromatography (on silica gel, petroleum ether/EtOAc = 20:1) to give a yellow oil (27.2 mg, 44% yield).  $^1\text{H}$  NMR (400 MHz,  $\text{CDCl}_3$ )  $\delta$  8.74 (d,  $J = 5.2$  Hz, 1H), 8.03 (d,  $J = 7.6$  Hz, 2H), 7.88 (s, 1H), 7.64 (d,  $J = 8.2$  Hz, 2H), 7.57 – 7.44 (m, 5H), 7.42 – 7.39 (m, 1H).  $^{13}\text{C}$  NMR (100 MHz,  $\text{CDCl}_3$ )  $\delta$  158.2, 150.2, 148.1, 139.2, 137.4, 132.3, 129.1, 128.8, 128.6, 127.0, 123.5, 119.9, 118.4. HRMS (ESI)  $m/z$  calcd. for  $\text{C}_{17}\text{H}_{13}\text{BrN}^+$  ( $\text{M}+\text{H}$ ) $^+$  310.0226, found 310.0236.

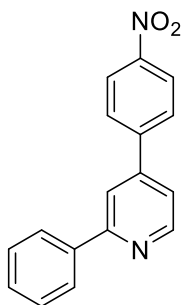

#### 4-(4-Nitrophenyl)-2-phenylpyridine (3ai)<sup>1</sup>

Purified directly by flash column chromatography (on silica gel, petroleum ether/EtOAc = 10:1) to give a yellow

solid (13.8 mg, 25% yield). Mp: 132-134 °C. <sup>1</sup>H NMR (400 MHz, CDCl<sub>3</sub>) δ 8.83 (d, *J* = 5.2 Hz, 1H), 8.38 (d, *J* = 8.5 Hz, 2H), 8.06 (d, *J* = 7.4 Hz, 2H), 7.94 (s, 1H), 7.85 (d, *J* = 8.6 Hz, 2H), 7.57 – 7.45 (m, 4H). <sup>13</sup>C NMR (100 MHz, CDCl<sub>3</sub>) δ 158.5, 150.4, 148.2, 146.9, 144.8, 138.8, 129.4, 128.8, 128.0, 127.0, 124.3, 120.1, 118.7.

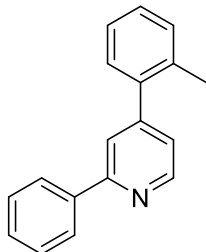

### 2-Phenyl-4-(*o*-tolyl)pyridine (4aj)

Purified directly by flash column chromatography (on silica gel, petroleum ether/EtOAc = 20:1) to give a yellow oil (26.4 mg, 54% yield). <sup>1</sup>H NMR (400 MHz, CDCl<sub>3</sub>) δ 8.73 (d, *J* = 5.0 Hz, 1H), 8.04 – 7.99 (m, 2H), 7.70 (d, *J* = 1.6 Hz, 1H), 7.51 – 7.41 (m, 3H), 7.33 – 7.20 (m, 5H), 2.33 (s, 3H). <sup>13</sup>C NMR (100 MHz, CDCl<sub>3</sub>) δ 157.3, 150.6, 149.4, 139.3, 139.3, 135.0, 130.6, 129.2, 129.0, 128.7, 128.4, 127.0, 126.1, 122.7, 121.2, 20.3. HRMS (ESI) *m/z* calcd. for C<sub>18</sub>H<sub>16</sub>N<sup>+</sup> (M+H)<sup>+</sup> 246.1277, found 246.1280.

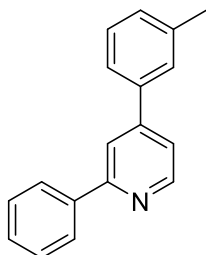

### 2-Phenyl-4-(*m*-tolyl)pyridine (4ak)

Purified directly by flash column chromatography (on silica gel, petroleum ether/EtOAc = 20:1) to give a yellow oil (27.9 mg, 57% yield). <sup>1</sup>H NMR (400 MHz, CDCl<sub>3</sub>) δ 8.73 (d, *J* = 5.1 Hz, 1H), 8.08 – 8.02 (m, 2H), 7.92 (d, *J* = 1.7 Hz, 1H), 7.49 (d, *J* = 7.4 Hz, 4H), 7.45 – 7.38 (m, 3H), 7.30 – 7.24 (m, 1H), 2.46 (s, 3H). <sup>13</sup>C NMR (100 MHz, CDCl<sub>3</sub>) δ 157.9, 149.9, 149.5, 139.4, 138.8, 138.4, 129.8, 129.0, 128.7, 127.8, 127.0, 124.2, 120.3, 118.8, 21.51. HRMS (ESI) *m/z* calcd. for C<sub>18</sub>H<sub>16</sub>N<sup>+</sup> (M+H)<sup>+</sup> 246.1277, found 246.1279

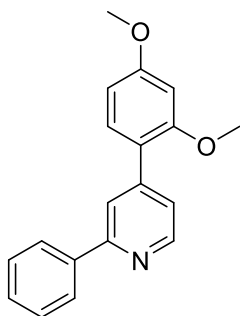

#### 4-(2,4-Dimethoxyphenyl)-2-phenylpyridine (3al)

Purified directly by flash column chromatography (on silica gel, petroleum ether/EtOAc = 10:1) to give a yellow oil (20.9 mg, 36% yield).  $^1\text{H}$  NMR (400 MHz,  $\text{CDCl}_3$ )  $\delta$  8.68 (d,  $J = 5.2$  Hz, 1H), 8.04 – 7.98 (m, 2H), 7.88 (s, 1H), 7.51 – 7.46 (m, 2H), 7.44 – 7.39 (m, 2H), 7.35 (d,  $J = 8.3$  Hz, 1H), 6.63 – 6.58 (m, 2H), 3.87 (s, 3H), 3.84 (s, 3H).  $^{13}\text{C}$  NMR (100 MHz,  $\text{CDCl}_3$ )  $\delta$  161.4, 157.7, 157.2, 149.1, 147.0, 139.7, 131.1, 128.7, 128.7, 127.0, 122.7, 121.3, 120.6, 105.0, 99.0, 55.6, 55.5. HRMS (ESI)  $m/z$  calcd. for  $\text{C}_{19}\text{H}_{18}\text{NO}_2^+$  ( $\text{M}+\text{H}$ ) $^+$  292.1332, found 292.1333.

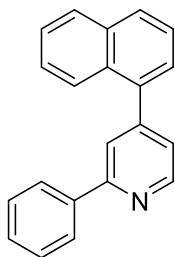

#### 4-(Naphthalen-1-yl)-2-phenylpyridine (3am)<sup>4</sup>

Purified directly by flash column chromatography (on silica gel, petroleum ether/EtOAc = 20:1) to give a yellow oil (27.0 mg, 48% yield).  $^1\text{H}$  NMR (400 MHz,  $\text{CDCl}_3$ )  $\delta$  8.81 (d,  $J = 5.0$  Hz, 1H), 8.10 – 8.03 (m, 2H), 7.95 – 7.87 (m, 4H), 7.59 – 7.52 (m, 2H), 7.51 – 7.42 (m, 5H), 7.39 – 7.37 (m, 1H).  $^{13}\text{C}$  NMR (100 MHz,  $\text{CDCl}_3$ )  $\delta$  157.5, 149.6, 149.5, 139.2, 137.6, 133.7, 130.8, 129.1, 128.8, 128.8, 128.5, 127.0, 126.8, 126.6, 126.2, 125.3, 125.2, 123.5, 122.0.

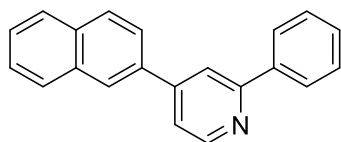

#### 4-(Naphthalen-2-yl)-2-phenylpyridine (3an)<sup>4</sup>

Purified directly by flash column chromatography (on silica gel, petroleum ether/EtOAc = 20:1) to give a yellow oil (28.7mg, 51% yield).  $^1\text{H}$  NMR (400 MHz,  $\text{CDCl}_3$ )  $\delta$  8.78 (d,  $J = 5.2$  Hz, 1H), 8.17 (d,  $J = 1.8$  Hz, 1H), 8.11 – 8.03 (m, 3H), 7.99 – 7.93 (m, 2H), 7.92 – 7.88 (m, 1H), 7.82 – 7.78 (m, 1H), 7.58 – 7.50 (m, 5H), 7.48 – 7.45 (m,

1H). <sup>13</sup>C NMR (100 MHz, CDCl<sub>3</sub>) δ 158.1, 150.0, 149.3, 139.4, 135.7, 133.4, 133.4, 129.1, 128.9, 128.8, 128.4, 127.7, 127.1, 126.8, 126.7, 126.5, 124.6, 120.4, 119.0.

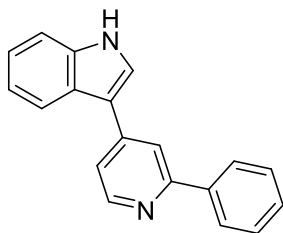

### 3-(2-Phenylpyridin-4-yl)-1H-indole (3ao)

Purified directly by flash column chromatography (on silica gel, petroleum ether/EtOAc = 20:1) to give a black solid (23.8 mg, 44% yield). Mp: 93-95 °C. <sup>1</sup>H NMR (400 MHz, DMSO-*d*<sub>6</sub>) δ 11.76 (s, 1H), 8.62 (d, *J* = 5.2 Hz, 1H), 8.26 – 8.09 (m, 4H), 8.07 – 7.99 (m, 1H), 7.74 – 7.68 (m, 1H), 7.54 – 7.41 (m, 4H), 7.23 – 7.15 (m, 2H). <sup>13</sup>C NMR (100 MHz, DMSO-*d*<sub>6</sub>) δ 156.8, 150.2, 145.0, 139.5, 137.7, 129.4, 129.2, 127.2, 127.0, 125.1, 122.4, 121.0, 119.8, 117.3, 113.4, 112.8. HRMS (ESI) *m/z* calcd. for C<sub>19</sub>H<sub>14</sub>N<sub>2</sub><sup>+</sup> (M+H)<sup>+</sup> 271.1230, found 271.1228.

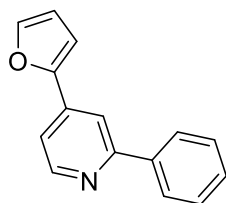

### 4-(Furan-2-yl)-2-phenylpyridine (3ap)<sup>1</sup>

Purified directly by flash column chromatography (on silica gel, petroleum ether/EtOAc = 20:1) to give a yellow oil. (20.8 mg, 47% yield). <sup>1</sup>H NMR (400 MHz, CDCl<sub>3</sub>) δ 8.69 (d, *J* = 5.0 Hz, 1H), 8.04 (d, *J* = 7.3 Hz, 2H), 7.98 (s, 1H), 7.58 (s, 1H), 7.53 – 7.41 (m, 4H), 6.95 (d, *J* = 3.0 Hz, 1H), 6.56 (s, 1H). <sup>13</sup>C NMR (100 MHz, CDCl<sub>3</sub>) δ 158.0, 151.5, 150.0, 143.7, 139.3, 138.3, 129.1, 128.7, 126.9, 116.3, 114.7, 112.1, 108.7.

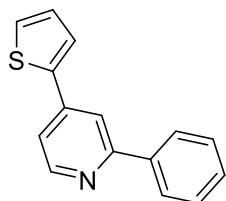

### 2-Phenyl-4-(thiophen-2-yl)pyridine (3aq)<sup>5</sup>

Purified directly by flash column chromatography (on silica gel, petroleum ether/EtOAc = 20:1) to give a yellow solid (22.4 mg, 47% yield). Mp: 62-65 °C. <sup>1</sup>H NMR (400 MHz, CDCl<sub>3</sub>) δ 8.66 (d, *J* = 4.5 Hz, 1H), 8.02 (d, *J* = 7.4 Hz, 2H), 7.90 (s, 1H), 7.57 – 7.42 (m, 6H), 7.16 (d, *J* = 4.4 Hz, 1H). <sup>13</sup>C NMR (100 MHz, CDCl<sub>3</sub>) δ 158.2, 150.2, 142.2, 141.4, 139.2, 129.1, 128.7, 128.4, 127.1, 127.0, 125.3, 118.4, 116.9.



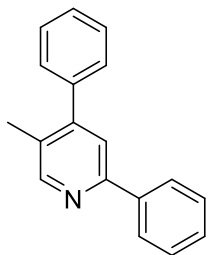

### 5-Methyl-2,4-diphenylpyridine (3ar)<sup>1</sup>

Purified directly by flash column chromatography (on silica gel, petroleum ether/EtOAc = 20:1) to give a yellow oil (30.4 mg, 62% yield). <sup>1</sup>H NMR (400 MHz, CDCl<sub>3</sub>) δ 8.58 (s, 1H), 8.02 – 7.98 (m, 2H), 7.60 (s, 1H), 7.48 – 7.44 (m, 4H), 7.43 – 7.36 (m, 4H), 2.31 (s, 3H). <sup>13</sup>C NMR (100 MHz, CDCl<sub>3</sub>) δ 155.2, 151.1, 149.9, 139.4, 139.3, 129.2, 128.7, 128.6, 128.5, 128.4, 127.9, 126.7, 121.0, 17.0.

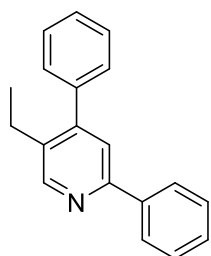

### 5-Ethyl-2,4-diphenylpyridine (3as)

Purified directly by flash column chromatography (on silica gel, petroleum ether/EtOAc = 20:1) to give a yellow oil (30.5 mg, 59% yield). <sup>1</sup>H NMR (400 MHz, CDCl<sub>3</sub>) δ 8.62 (s, 1H), 8.03 – 7.97 (m, 2H), 7.57 (s, 1H), 7.48 – 7.35 (m, 8H), 2.68 (q, *J* = 7.6 Hz, 2H), 1.13 (t, *J* = 7.6 Hz, 3H). <sup>13</sup>C NMR (100 MHz, CDCl<sub>3</sub>) δ 154.9, 150.3, 149.7, 139.4, 139.2, 135.3, 128.7, 128.6, 128.5, 128.4, 127.9, 126.7, 121.3, 23.3, 15.5. HRMS (ESI) *m/z* calcd. for C<sub>19</sub>H<sub>18</sub>N<sup>+</sup> (M+H)<sup>+</sup> 260.1434, found 260.1434.

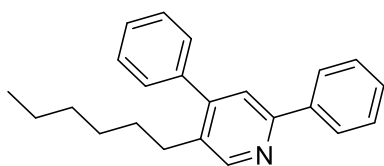

### 5-Hexyl-2,4-diphenylpyridine (3at)

Purified directly by flash column chromatography (on silica gel, petroleum ether/EtOAc = 20:1) to give a yellow oil (34.6 mg, 55% yield). <sup>1</sup>H NMR (400 MHz, CDCl<sub>3</sub>) δ 8.59 (s, 1H), 8.00 (d, *J* = 7.7 Hz, 2H), 7.57 (s, 1H), 7.47 – 7.38 (m, 6H), 7.37 – 7.33 (m, 2H), 2.67 – 2.60 (m, 2H), 1.49 – 1.42 (m, 2H), 1.24 – 1.15 (m, 6H), 0.84 – 0.79 (m, 3H). <sup>13</sup>C NMR (100 MHz, CDCl<sub>3</sub>) δ 154.8, 150.7, 149.9, 139.5, 139.2, 134.0, 128.7, 128.6, 128.5, 128.4, 127.8, 126.7, 121.2, 31.3, 30.9, 29.9, 28.9, 22.4, 14.0. HRMS (ESI) *m/z* calcd. for C<sub>23</sub>H<sub>26</sub>N<sup>+</sup> (M+H)<sup>+</sup> 316.2060, found 316.2056.

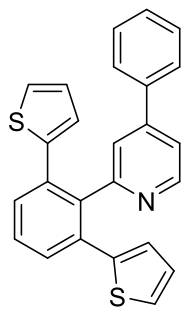

### 2-(2,6-di(thiophen-2-yl)phenyl)-4-phenylpyridine (4ab) <sup>1</sup>

Purified directly by flash column chromatography (on silica gel, petroleum ether/EtOAc = 20:1) to give a yellow oil (59 mg, 75% yield). <sup>1</sup>H NMR (400 MHz, CDCl<sub>3</sub>) δ 8.58 (d, *J* = 5.1 Hz, 1H), 7.59 (d, *J* = 7.7 Hz, 2H), 7.52 – 7.30 (m, 8H), 7.14 (d, *J* = 5.1 Hz, 2H), 6.84 – 6.80 (m, 2H), 6.72 (d, *J* = 3.6 Hz, 2H). <sup>13</sup>C NMR (100 MHz, CDCl<sub>3</sub>) δ 158.9, 149.2, 148.0, 142.6, 138.5, 138.1, 134.7, 130.0, 129.0, 128.9, 128.40, 127.2, 126.9, 126.8, 125.8, 124.4, 120.1.

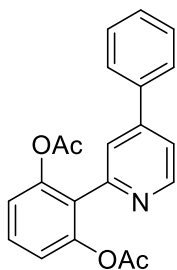

### 2-(4-phenylpyridin-2-yl)-1,3-phenylene diacetate (4ac)

Purified directly by flash column chromatography (on silica gel, petroleum ether/EtOAc = 10:1) to give a yellow oil (46 mg, 67% yield). <sup>1</sup>H NMR (400 MHz, CDCl<sub>3</sub>) δ 8.74 (d, *J* = 5.1 Hz, 1H), 7.65 (d, *J* = 6.7 Hz, 2H), 7.58 (s, 1H), 7.55 – 7.39 (m, 5H), 7.13 (d, *J* = 8.2 Hz, 2H), 2.02 (s, 6H). <sup>13</sup>C NMR (100 MHz, CDCl<sub>3</sub>) δ 168.9, 152.7, 149.9, 149.1, 148.2, 137.5, 129.3, 129.3, 129.21, 129.16, 127.6, 126.8, 122.8, 120.7, 120.3, 20.57. HRMS (ESI) *m/z* calcd. for C<sub>21</sub>H<sub>18</sub>NO<sub>4</sub><sup>+</sup> (*M*+*H*)<sup>+</sup> 348.1230, found 348.1236.

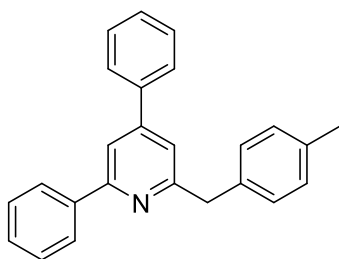

### 2-(4-methylbenzyl)-4,6-diphenylpyridine (4ad)

Purified directly by flash column chromatography (on silica gel, petroleum ether/EtOAc = 20:1) to give a colorless oil (41 mg, 61% yield). <sup>1</sup>H NMR (400 MHz, CDCl<sub>3</sub>) δ 8.06 (d, *J* = 7.3 Hz, 2H), 7.73 (s, 1H), 7.60 (d, *J* = 7.0 Hz, 2H), 7.53 – 7.39 (m, 6H), 7.28 (d, *J* = 7.7 Hz, 2H), 7.23 (s, 1H), 7.13 (d, *J* = 7.4 Hz, 2H), 4.25 (s, 2H), 2.32 (s,

3H).  $^{13}\text{C}$  NMR (100 MHz,  $\text{CDCl}_3$ )  $\delta$  161.7, 157.5, 149.7, 139.7, 138.8, 136.6, 135.8, 129.2, 129.1, 128.9, 128.8, 128.8, 128.7, 127.12, 127.08, 119.5, 116.4, 44.5, 21.0. HRMS (ESI)  $m/z$  calcd. for  $\text{C}_{25}\text{H}_{22}\text{N}^+$  ( $\text{M}+\text{H}$ ) $^+$  336.1747, found 336.1746.

## 5. References

- [1] H. Huang, J. Cai, L. Tang, Z. Wang, F. Li, G.-J. Deng, *J. Org. Chem.*, 2016, **81**, 1499–1505.
- [2] Y. Wei, N. Yoshikai, *J. Am. Chem. Soc.*, 2013, **135**, 3756–3759.
- [3] Y.-Y. Chuaa, H. A. Duong, *Chem. Commun.*, 2014, **50**, 8424-8427.
- [4] R. Singha, S. Dhara, J. K. Ray, *Tetrahedron Letters.*, 2013, **54**, 4841 – 4843.
- [5] M. Guzel, J. Watts, M. McGilvary, M. Wright, S. Kiren, *Tetrahedron Letters* 2015, **56**, 5275 – 5277.

## 6. NMR Spectra for the compounds prepared

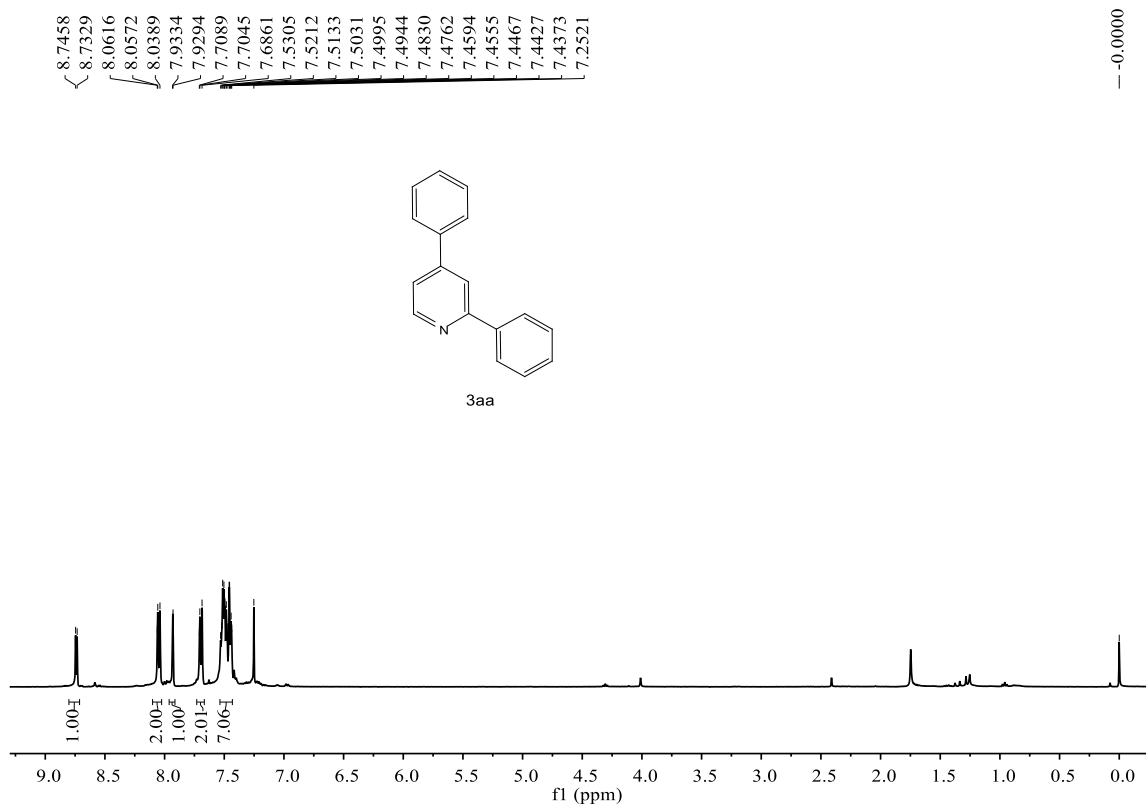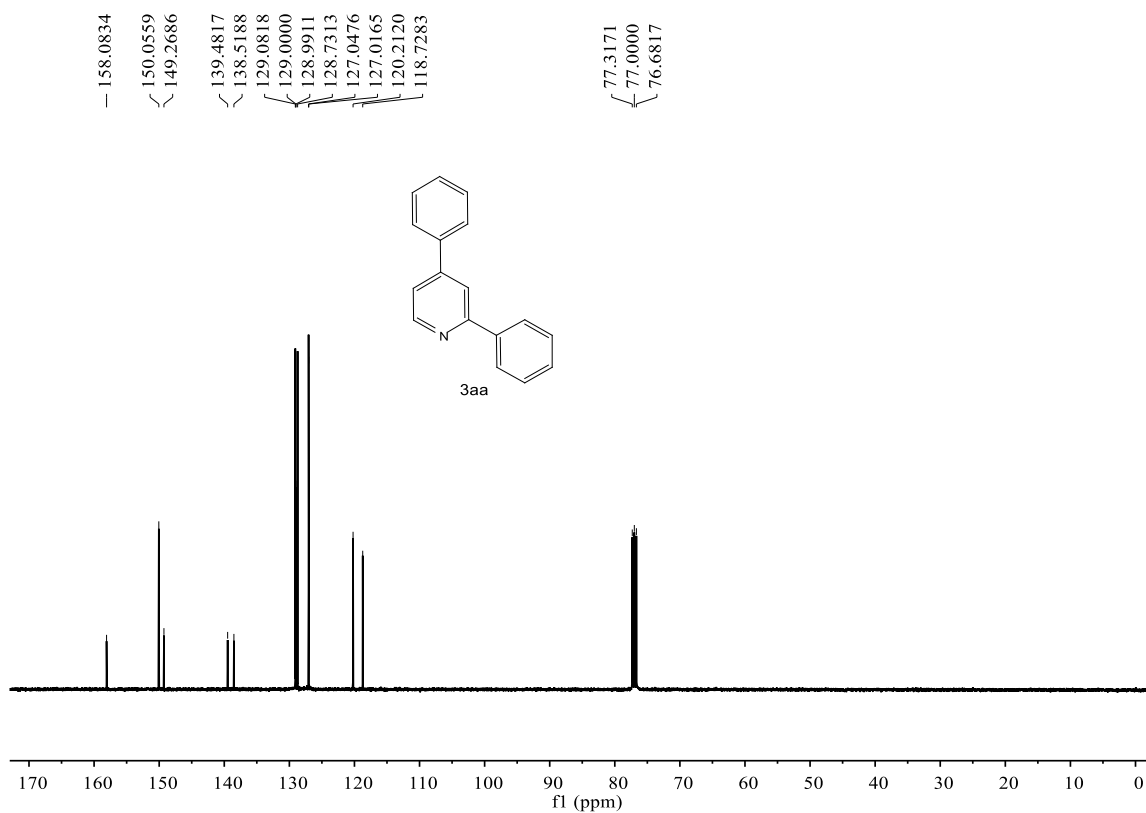

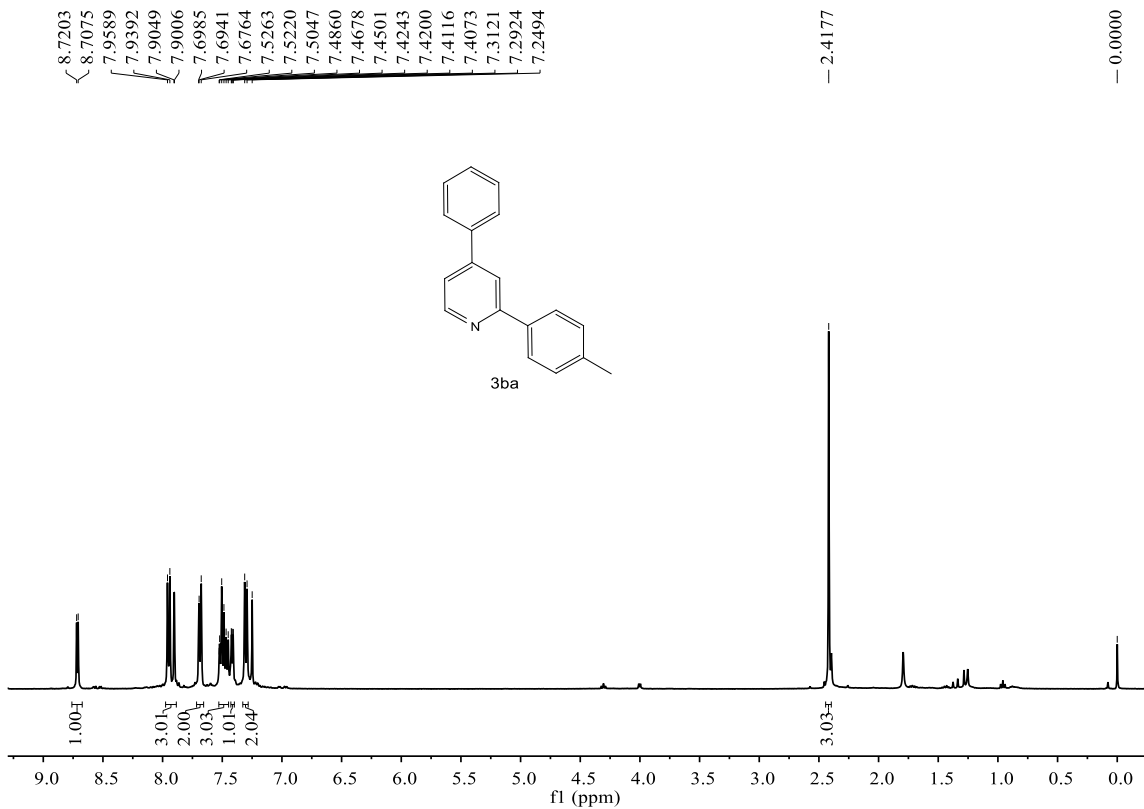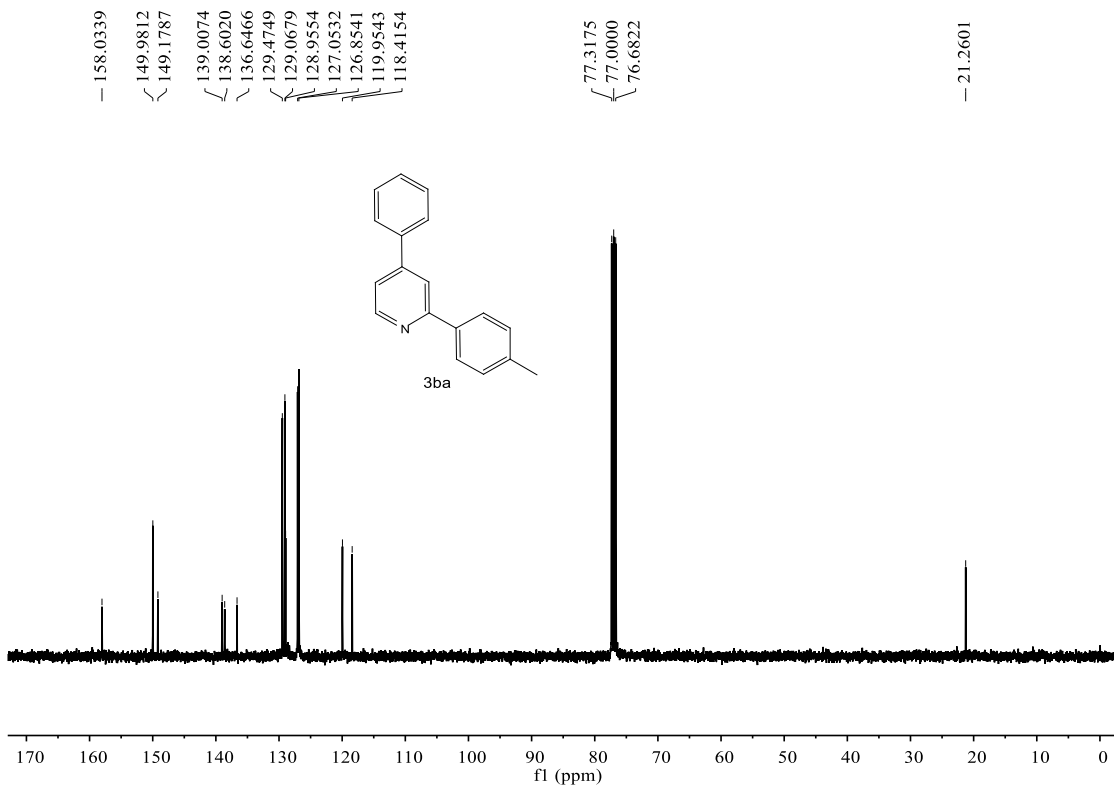

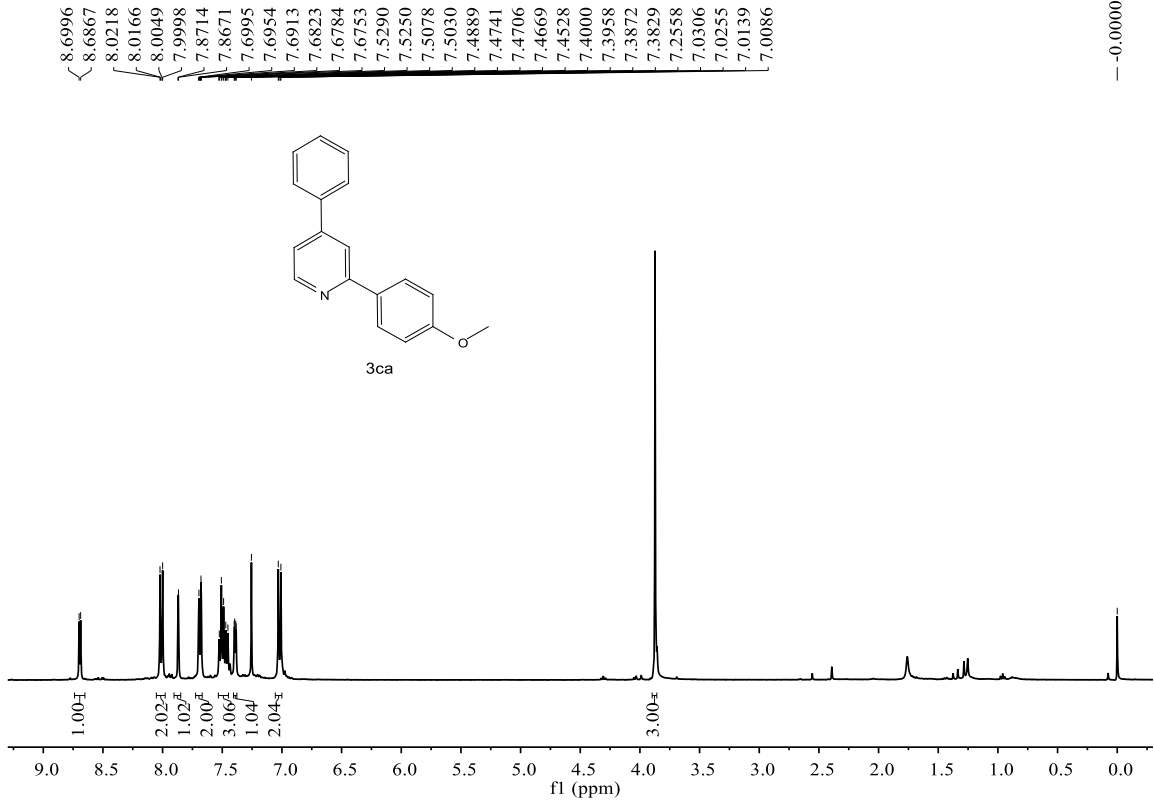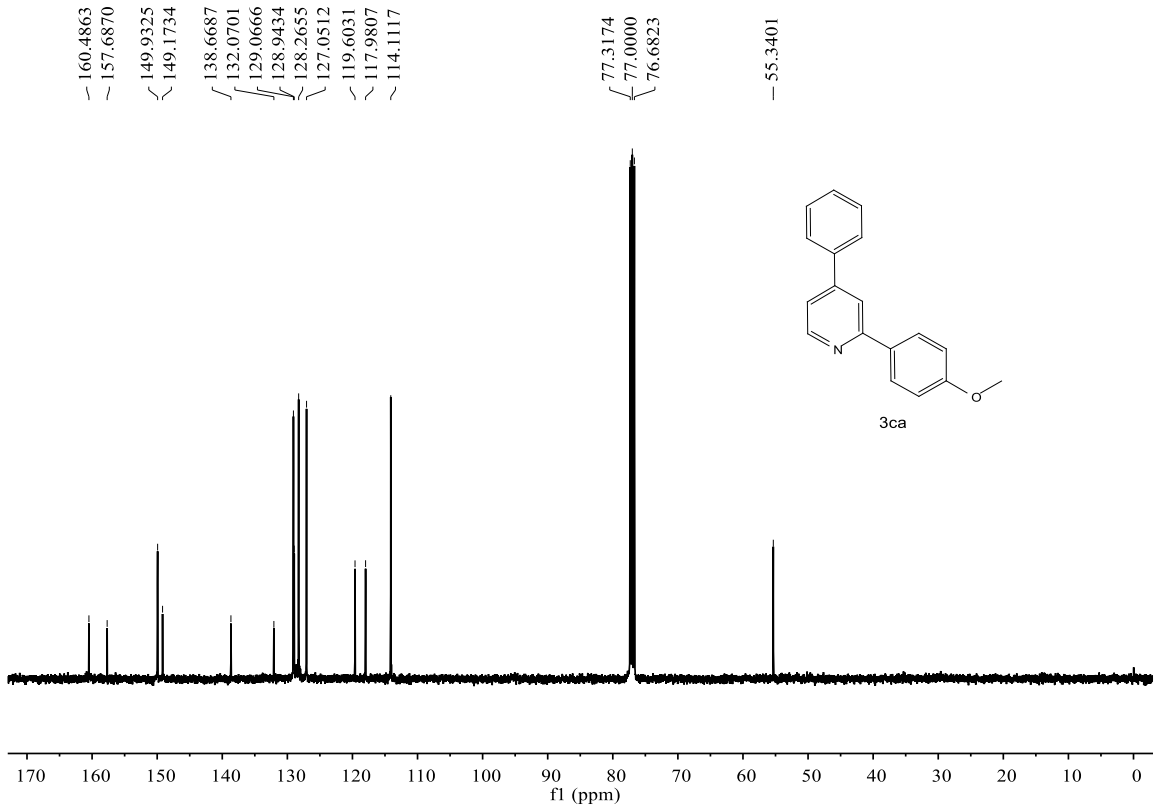

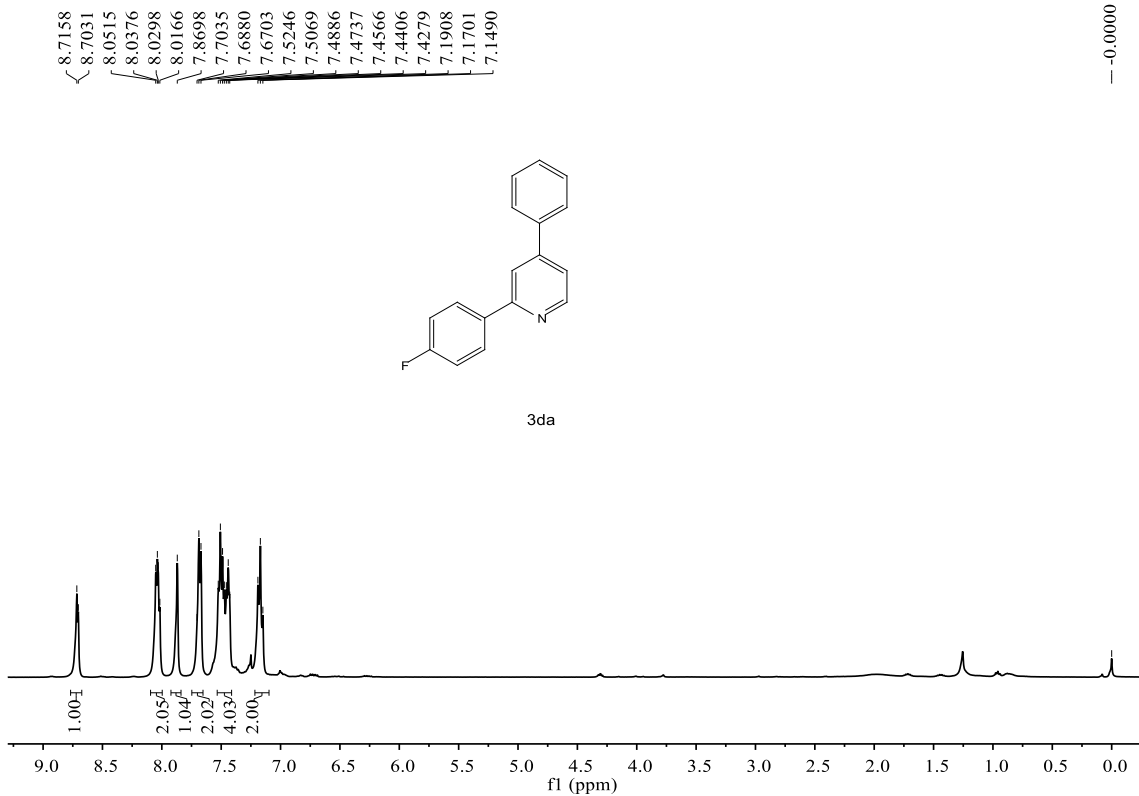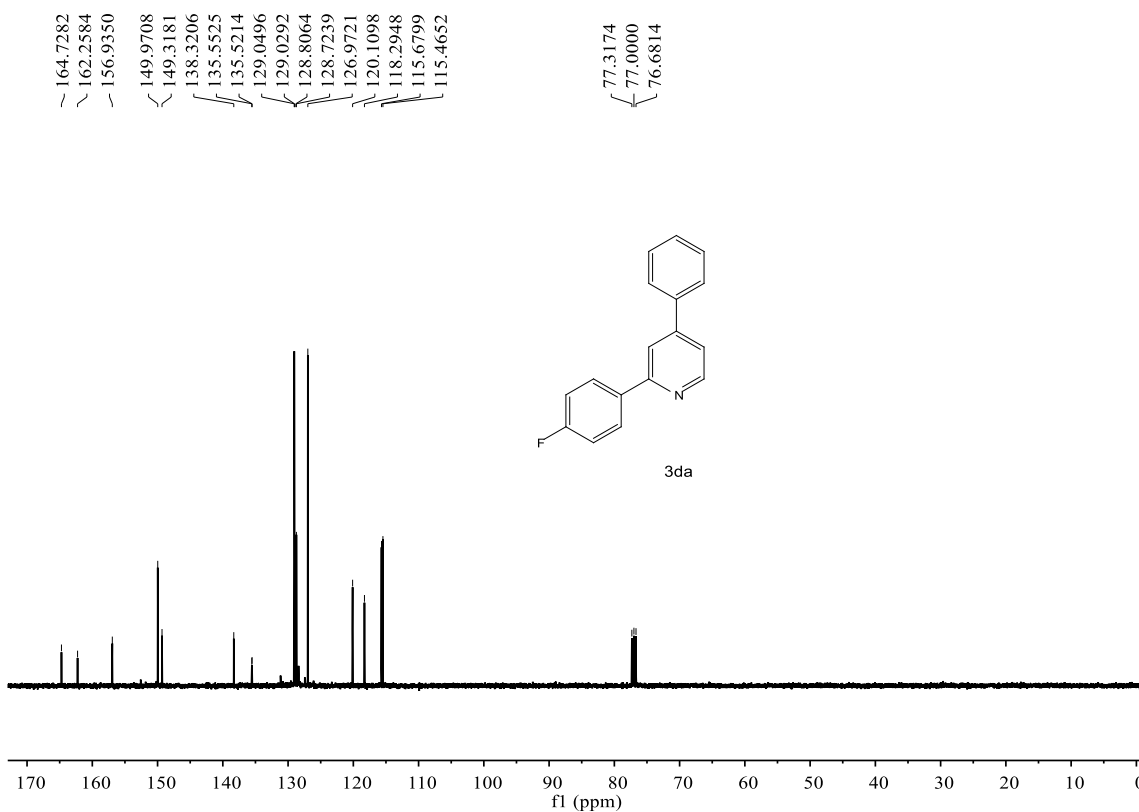

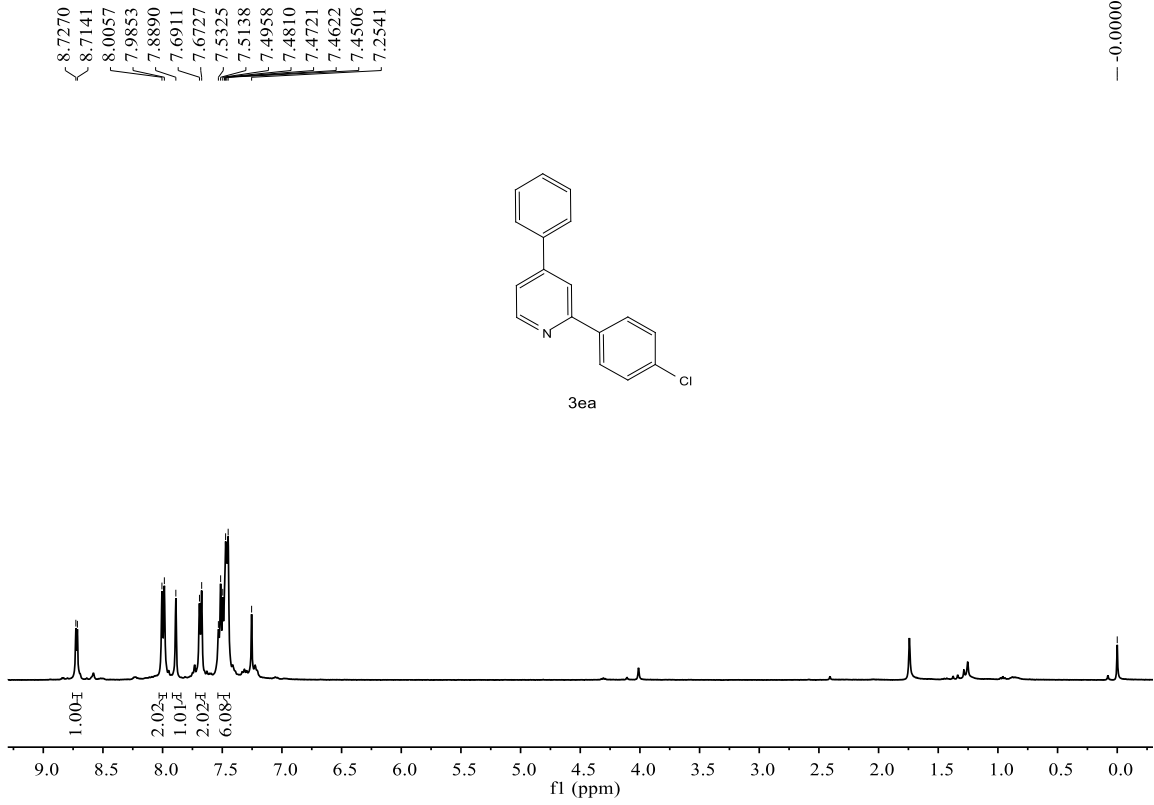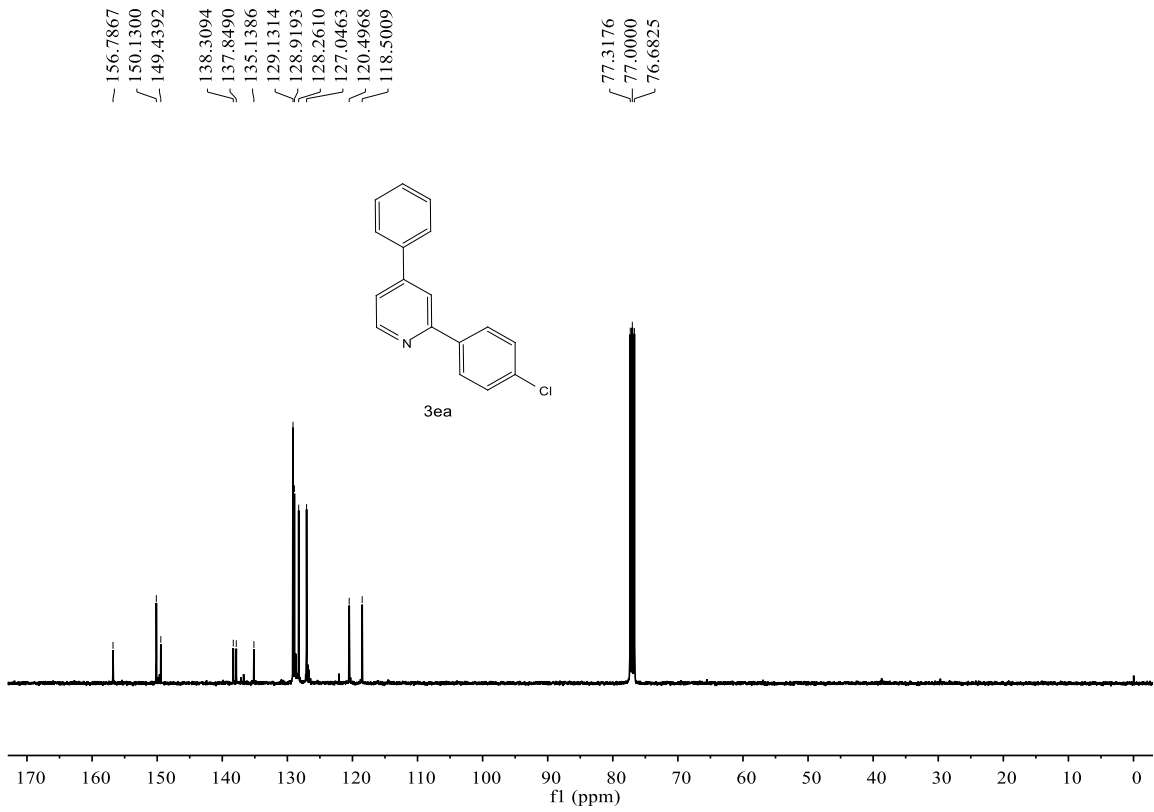



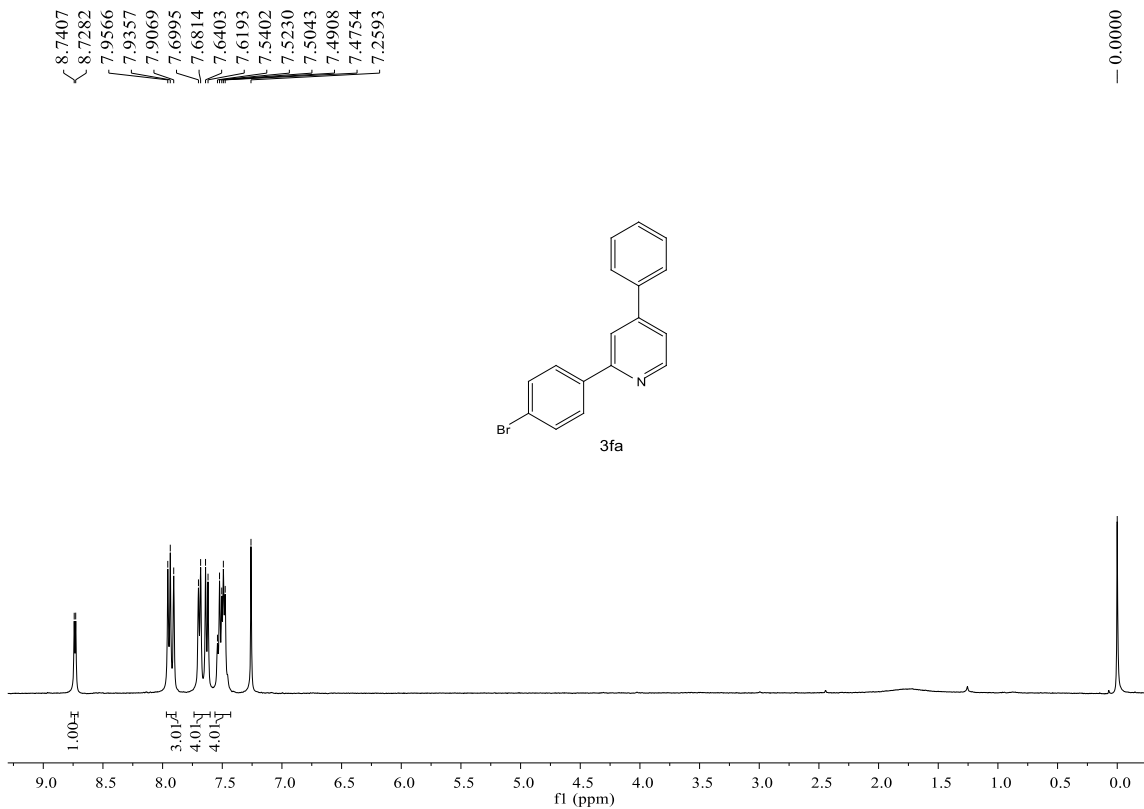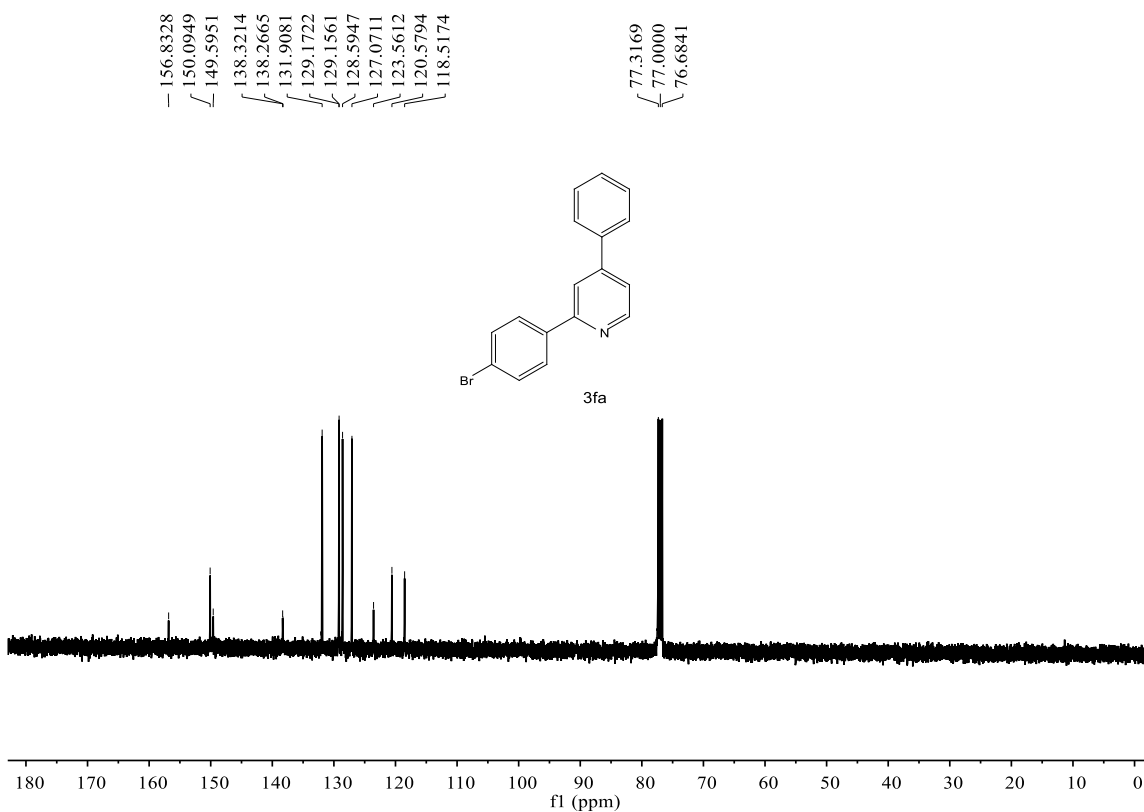

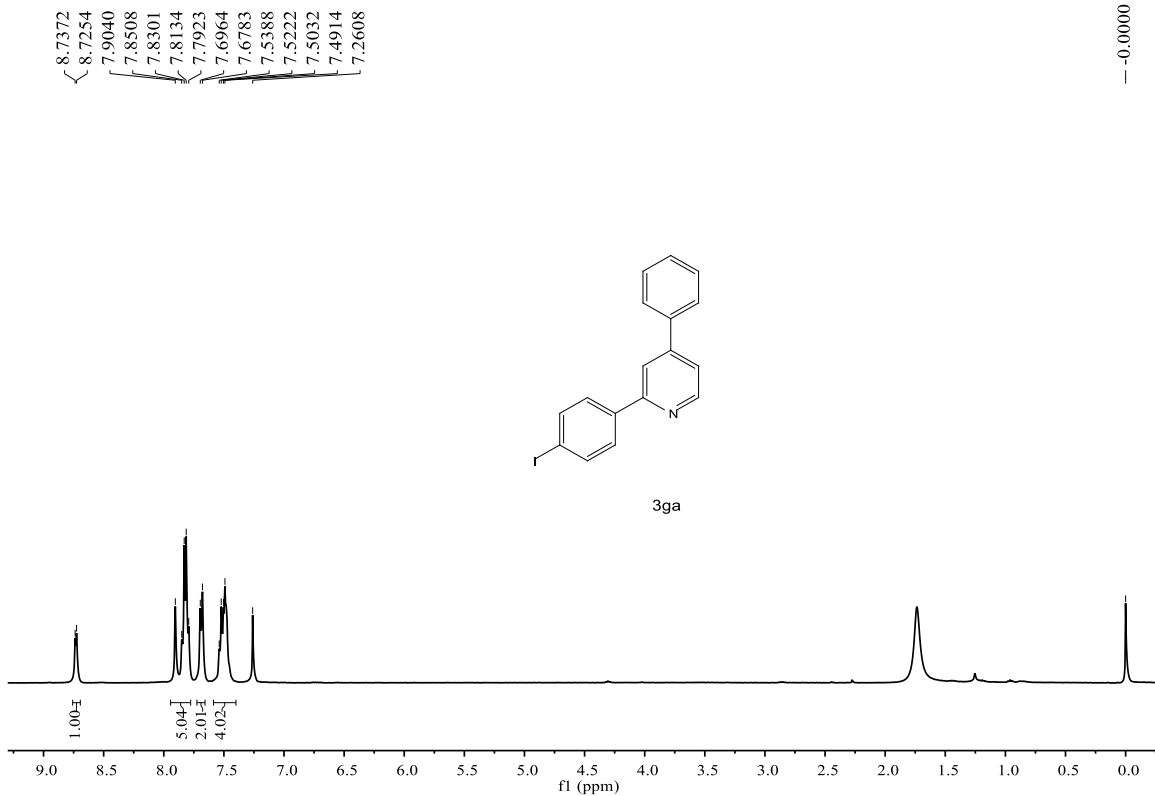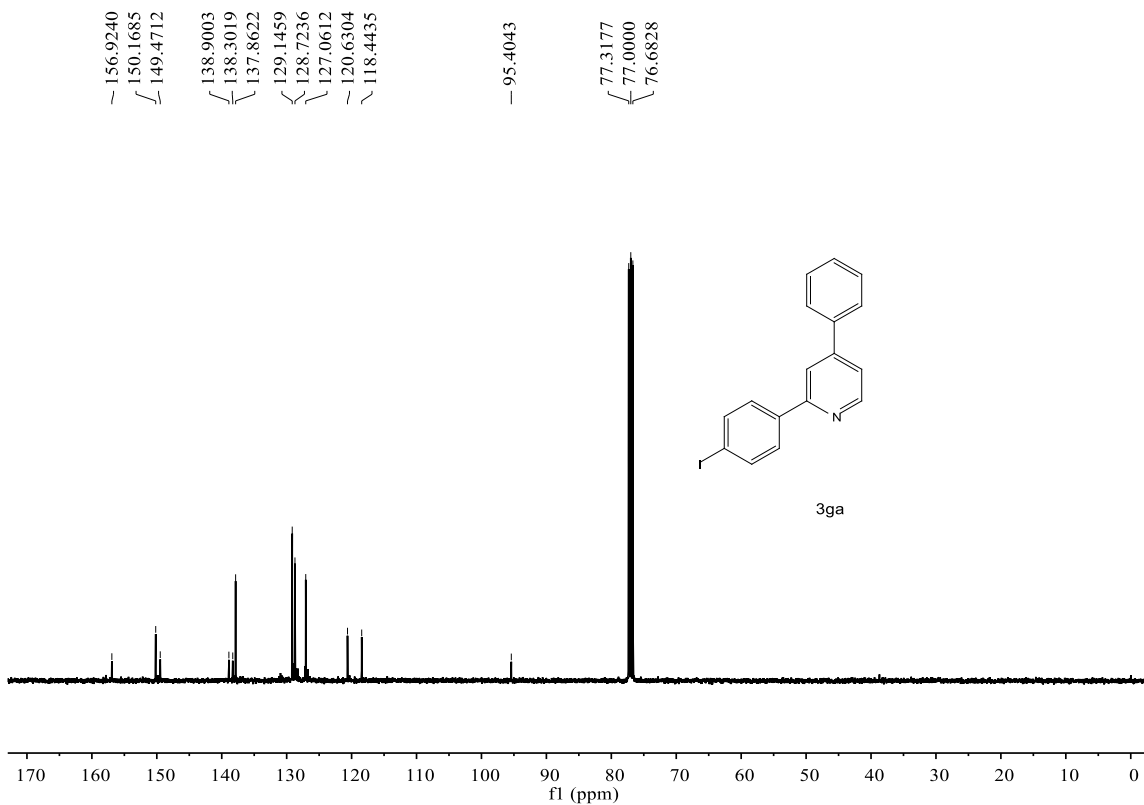

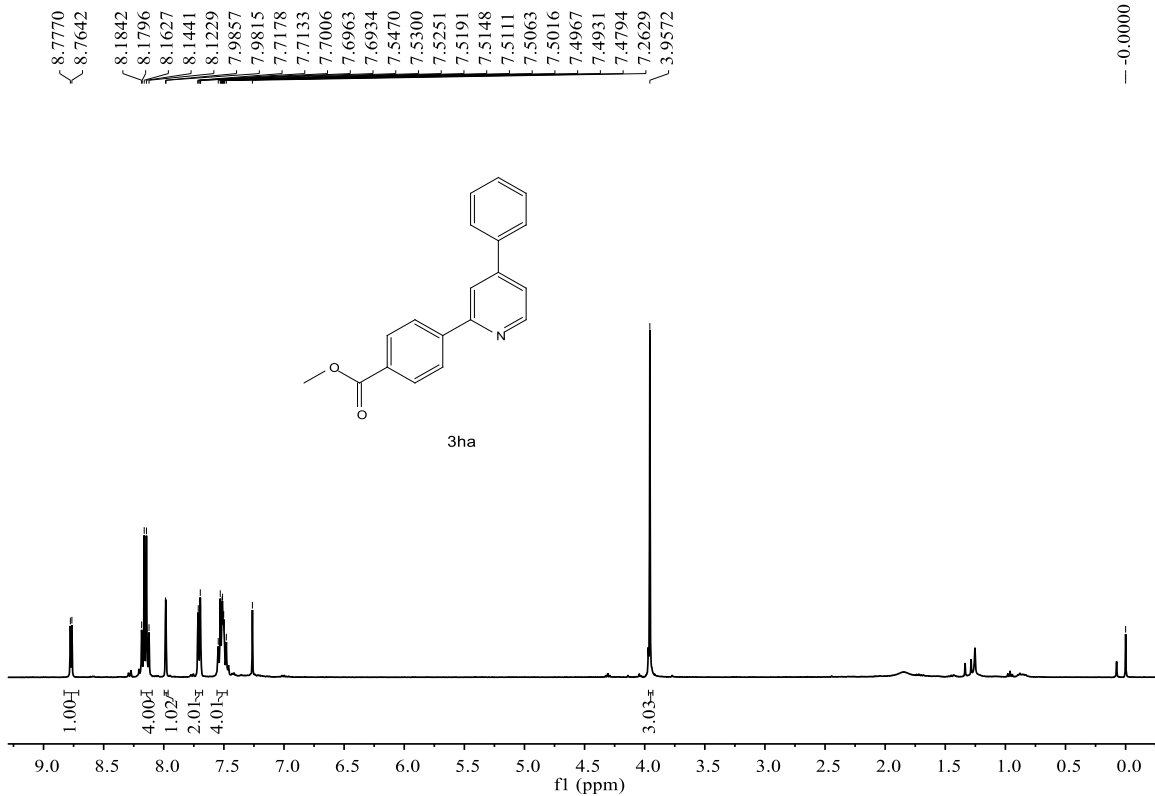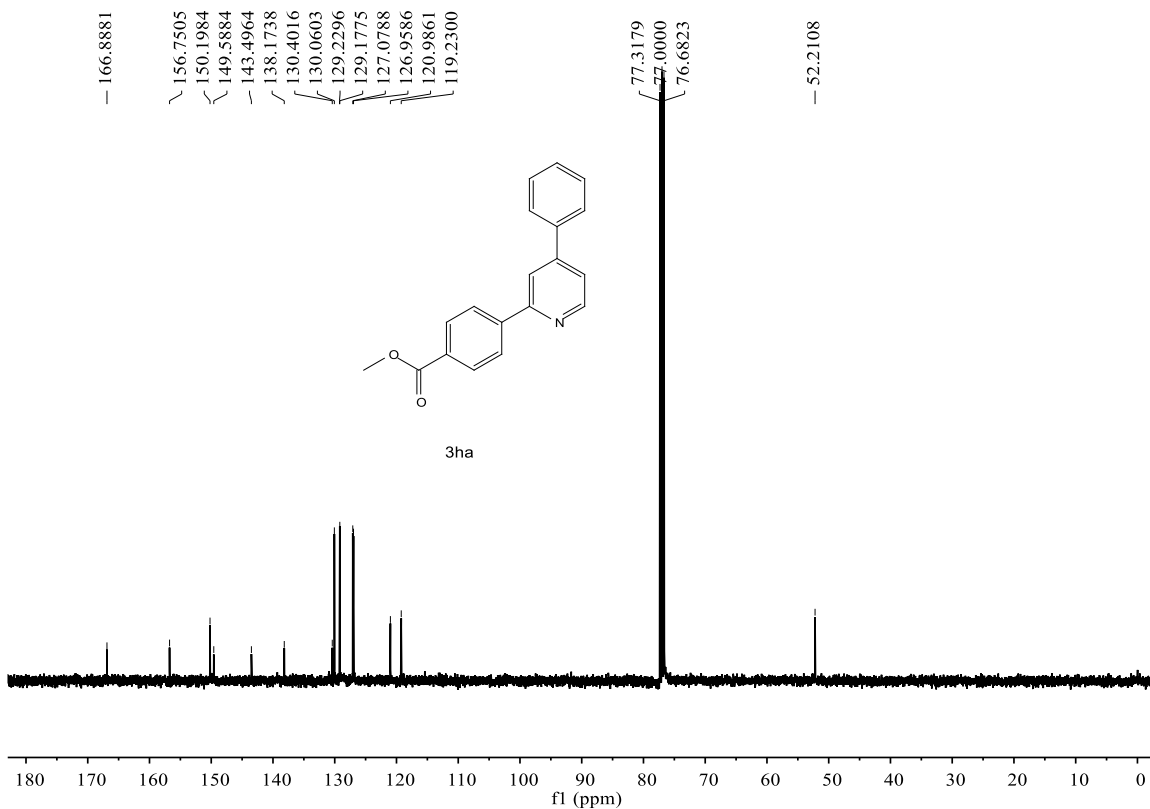

8.7381  
8.7254  
8.0920  
8.0868  
8.0754  
8.0701  
7.9021  
7.8979  
7.7010  
7.6966  
7.6839  
7.6789  
7.5377  
7.5207  
7.5155  
7.5017  
7.4877  
7.4794  
7.4756  
7.4705  
7.4669  
7.4622  
7.3487  
7.3277  
7.2551

0.0000

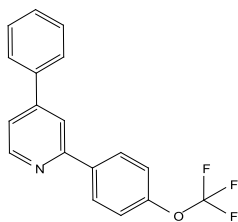

3ia

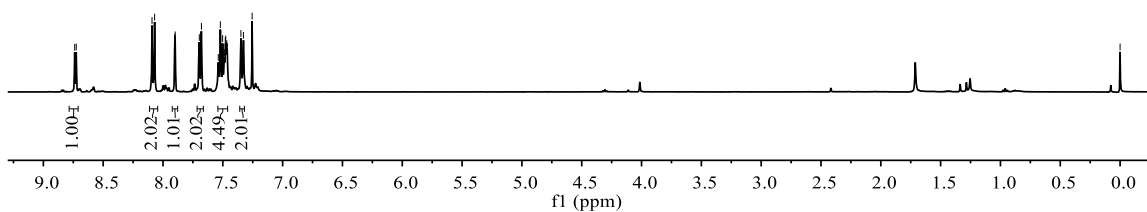

156.6395  
150.1727  
149.8845  
149.4818  
138.2811  
138.0810  
129.1582  
128.7159  
128.4943  
127.0467  
121.0714  
120.5617  
118.6380

77.3172  
77.0000  
76.6829

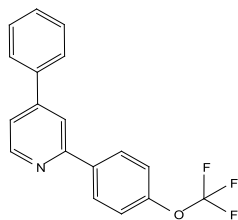

3ia

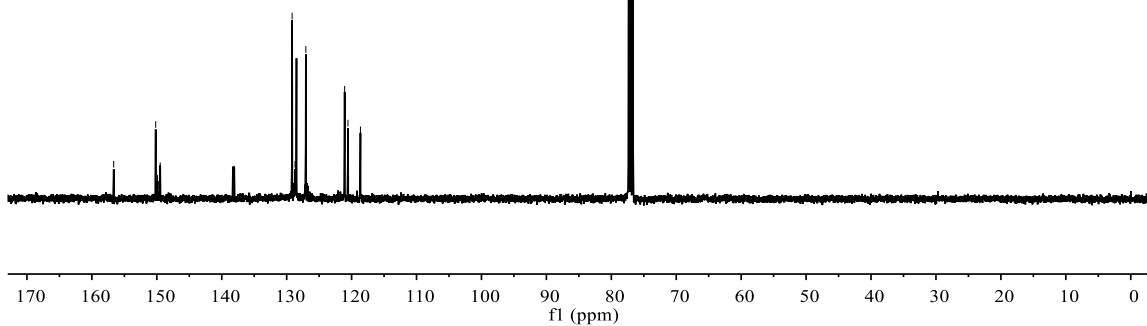

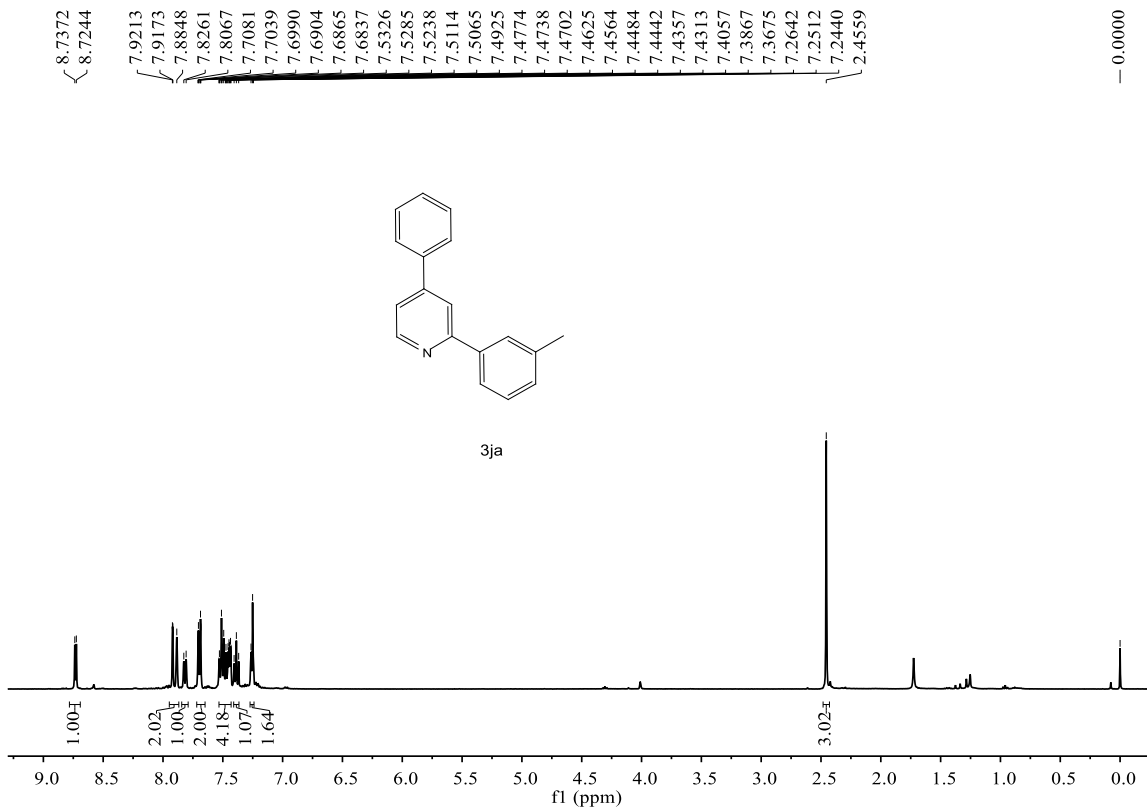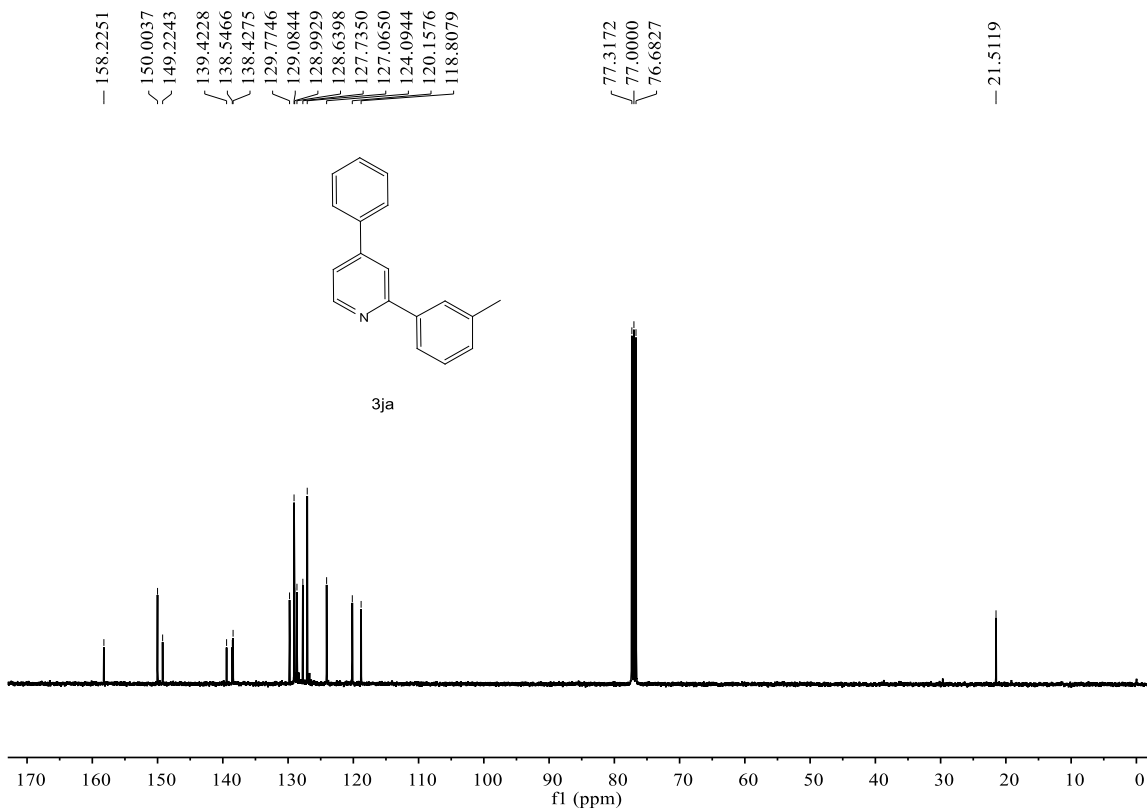

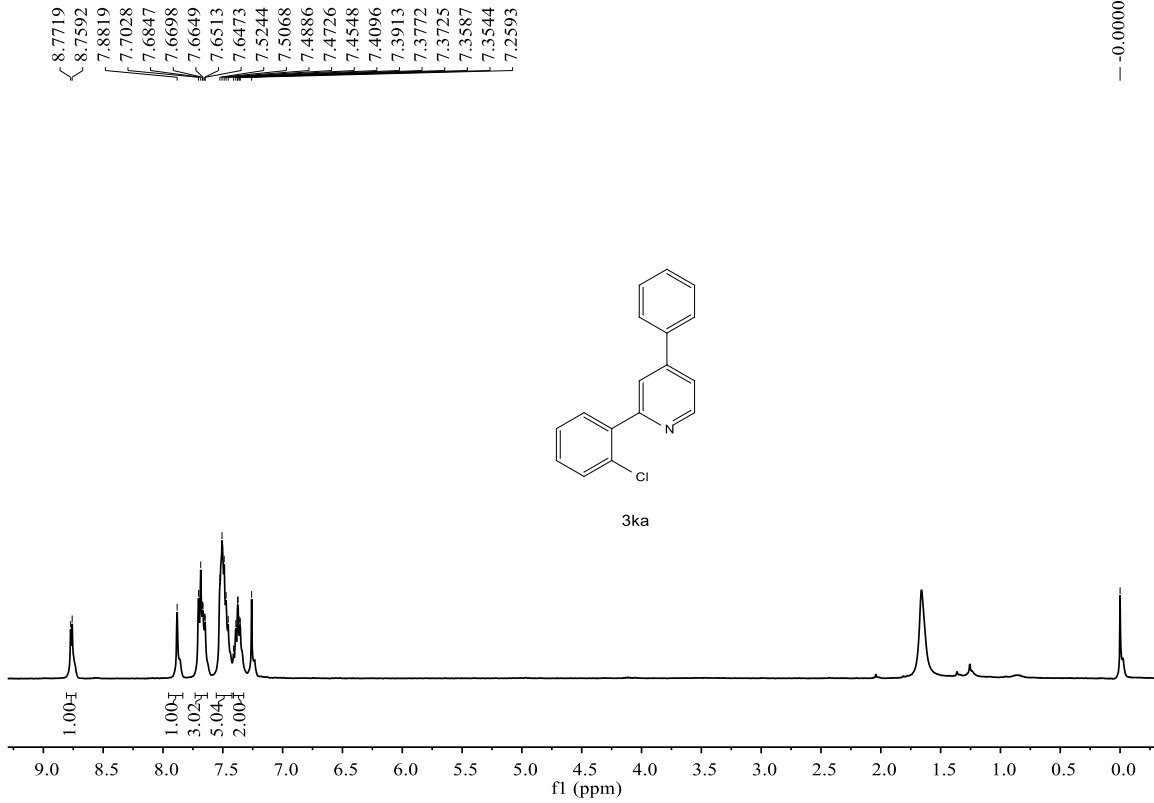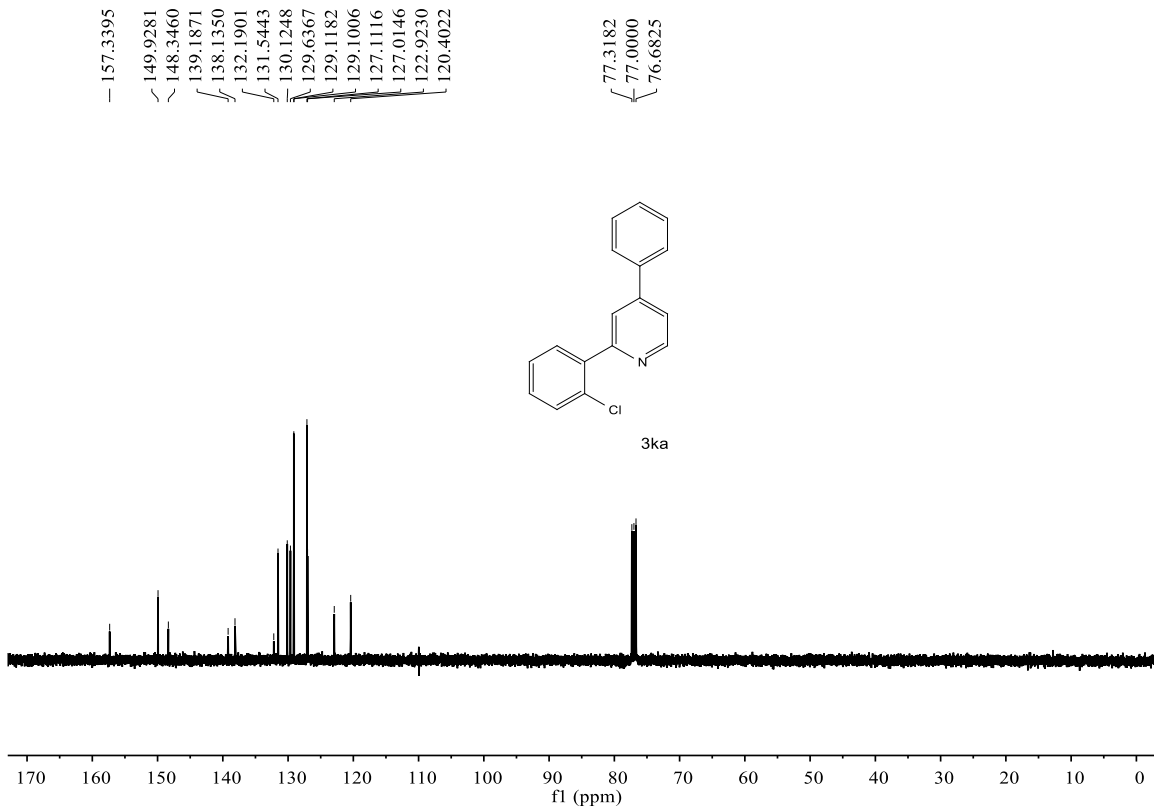

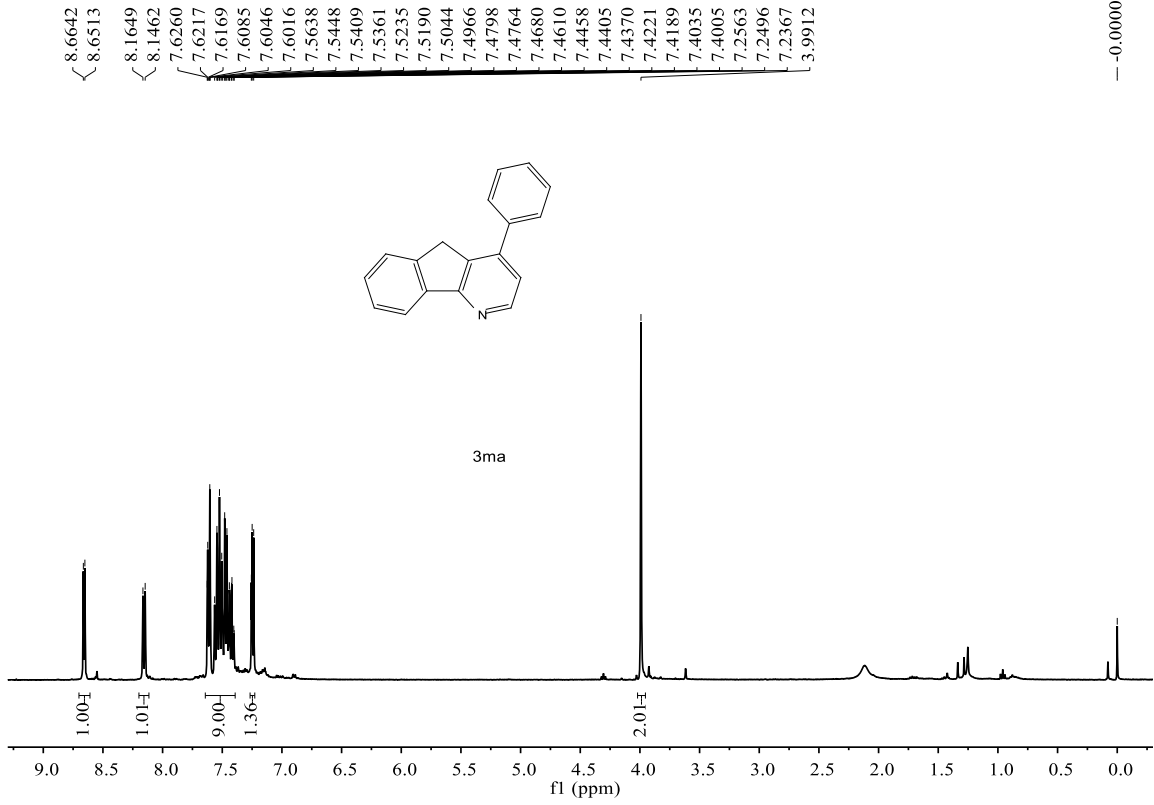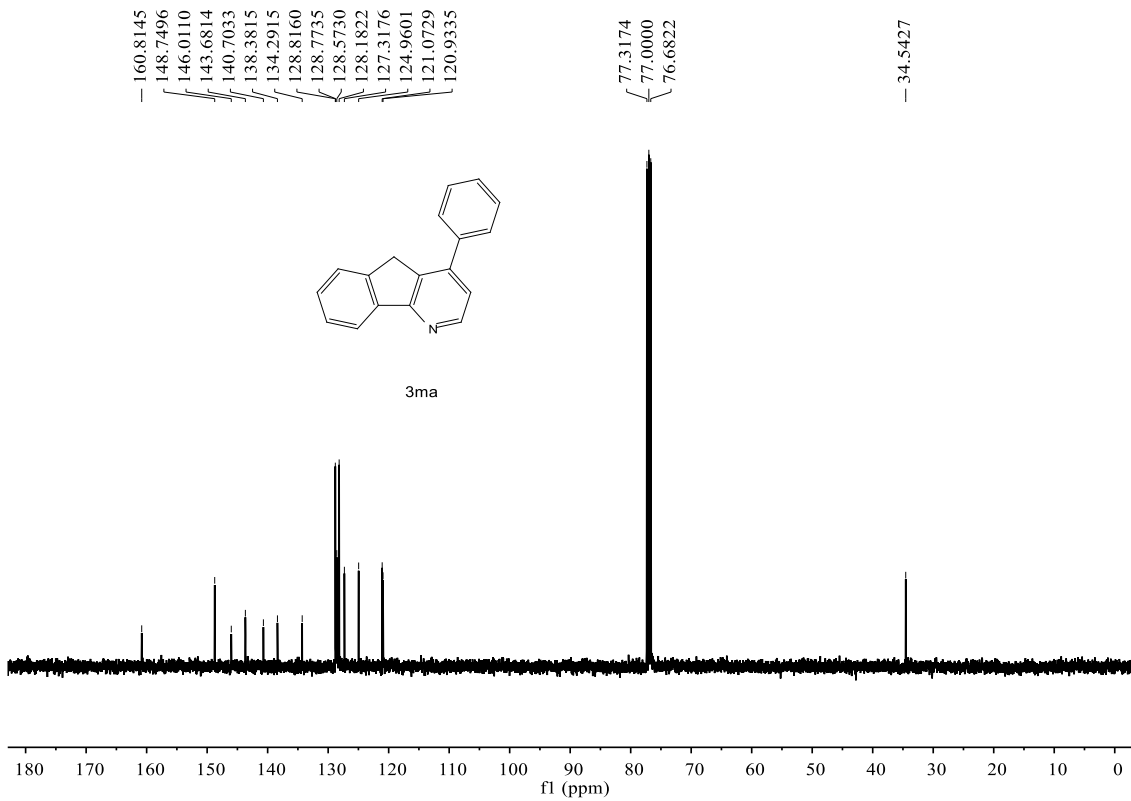

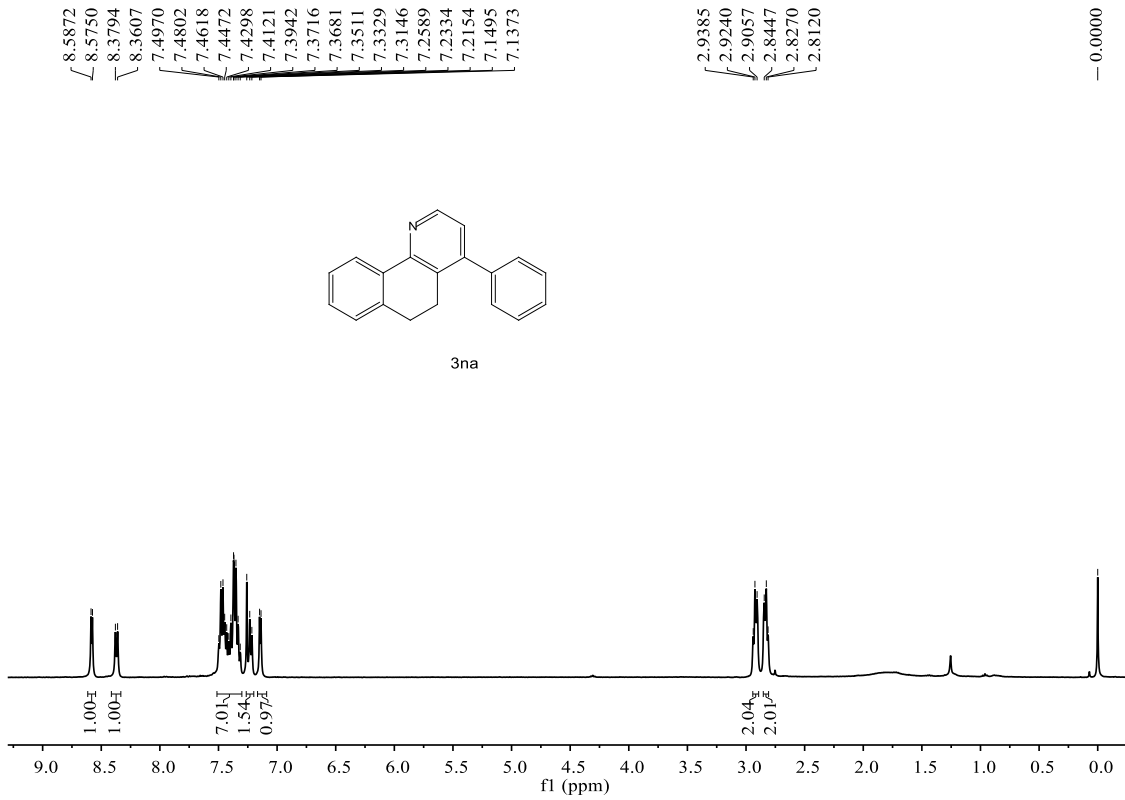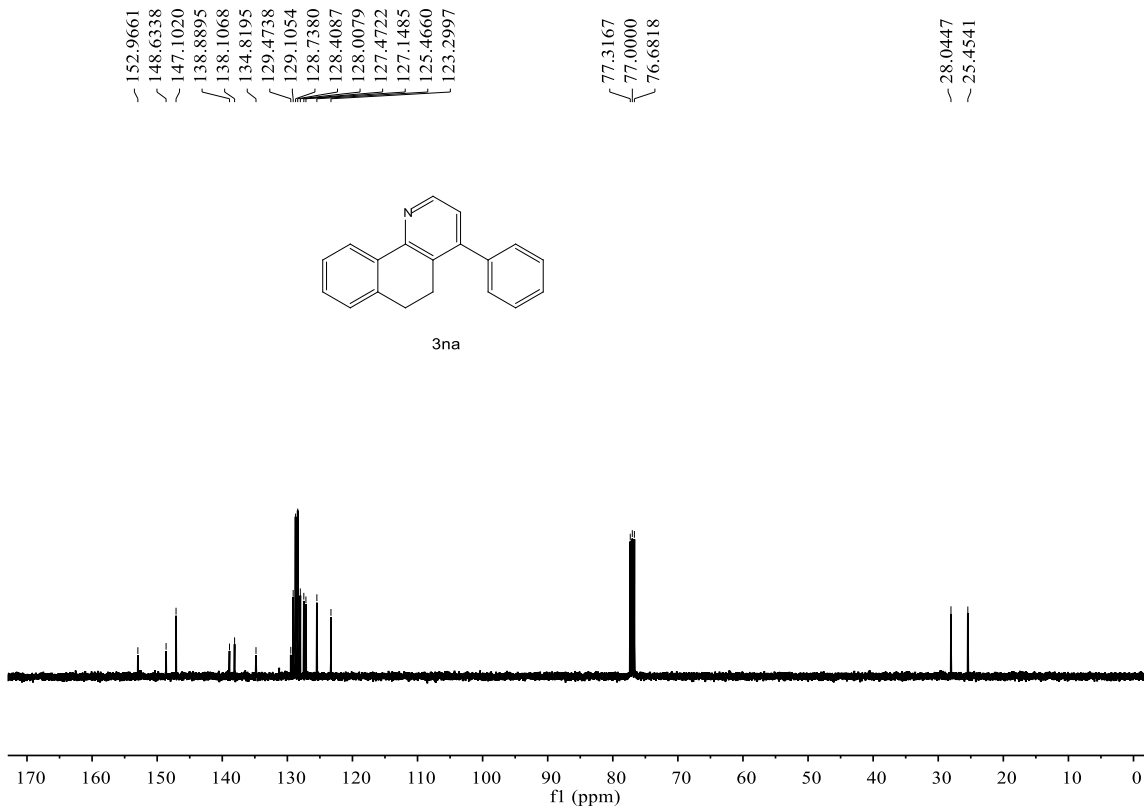



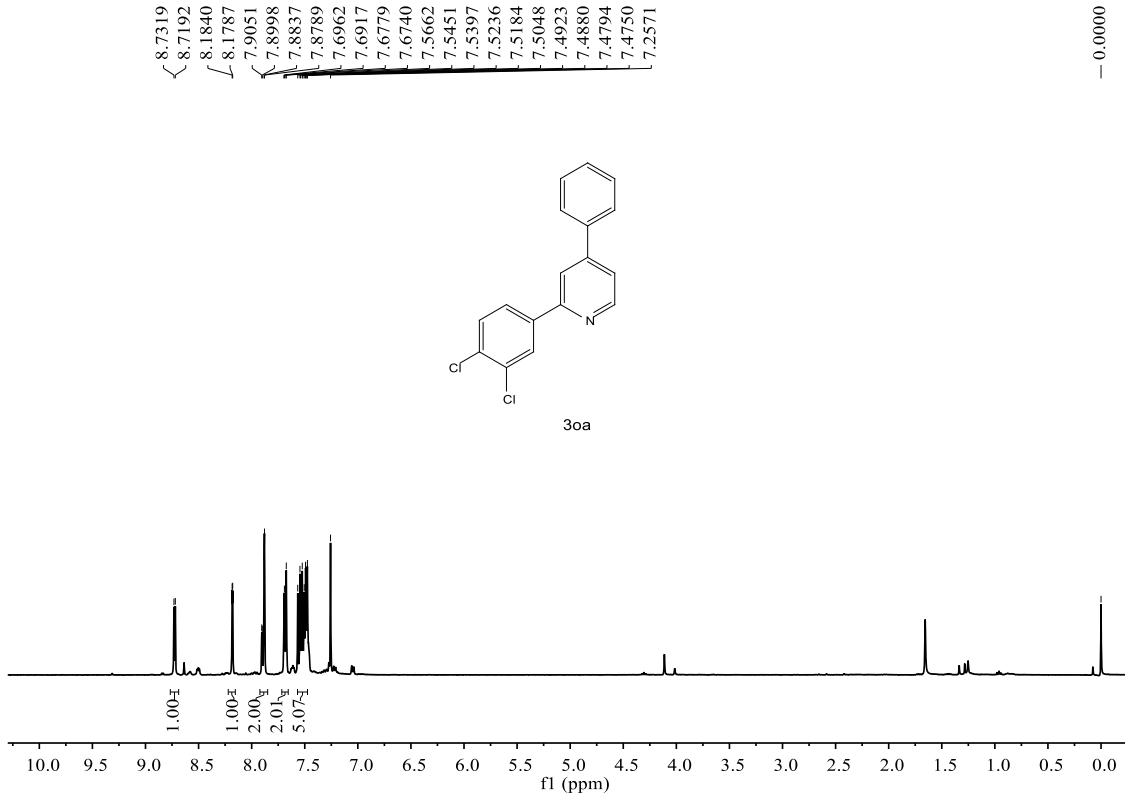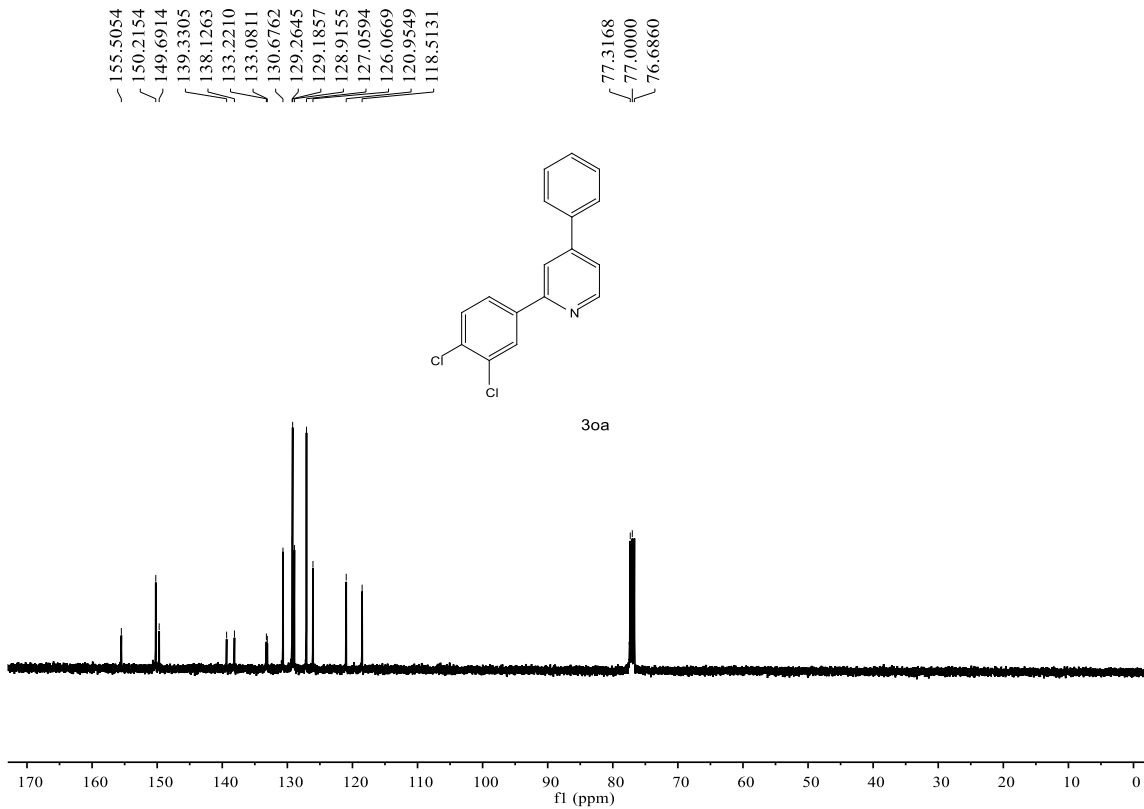

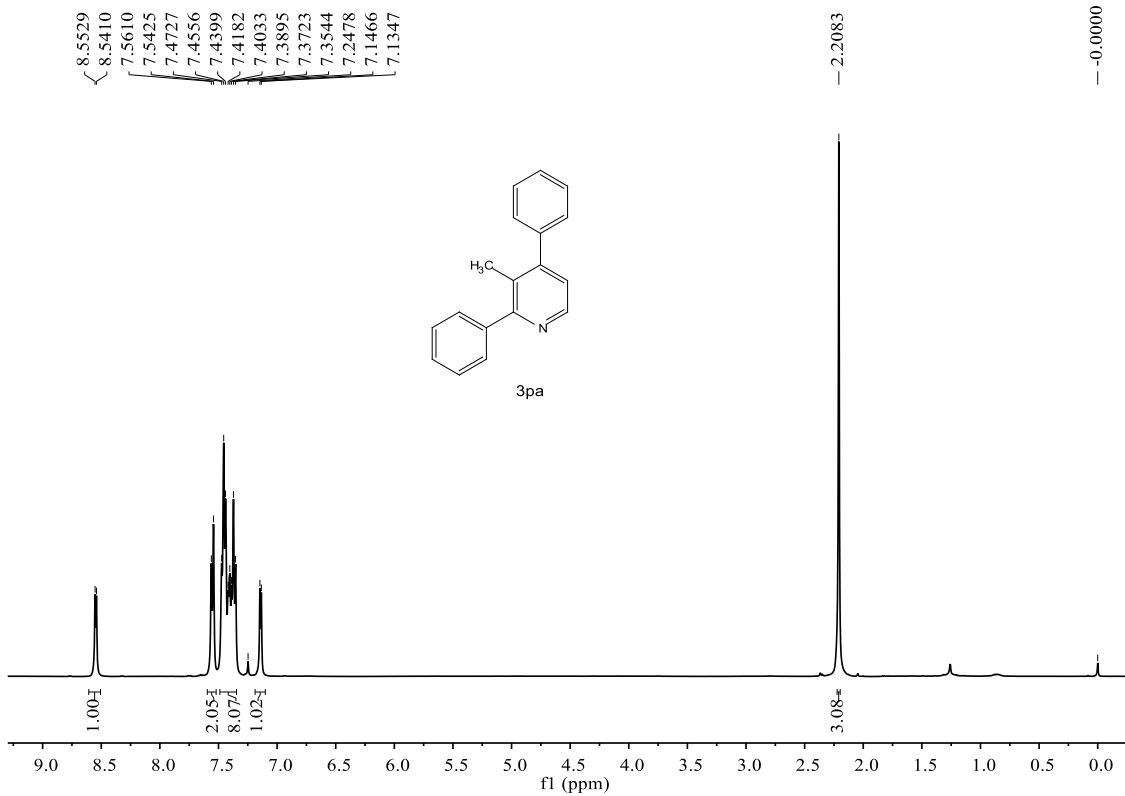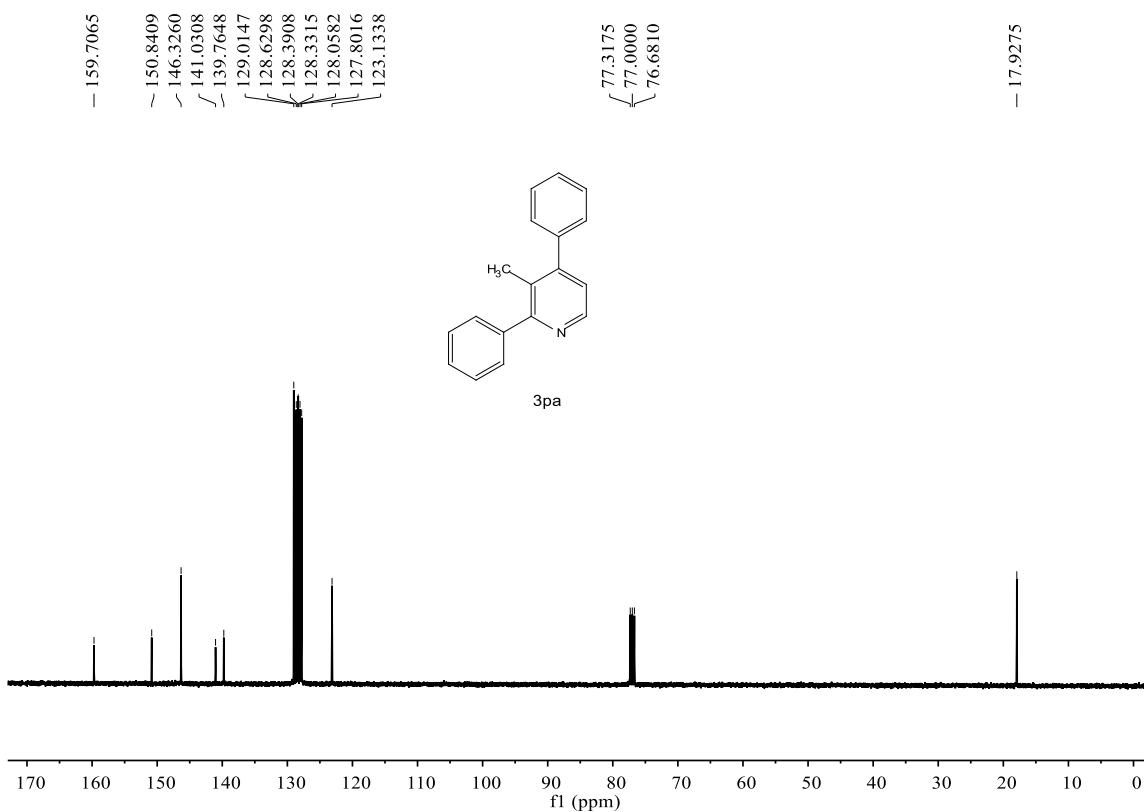

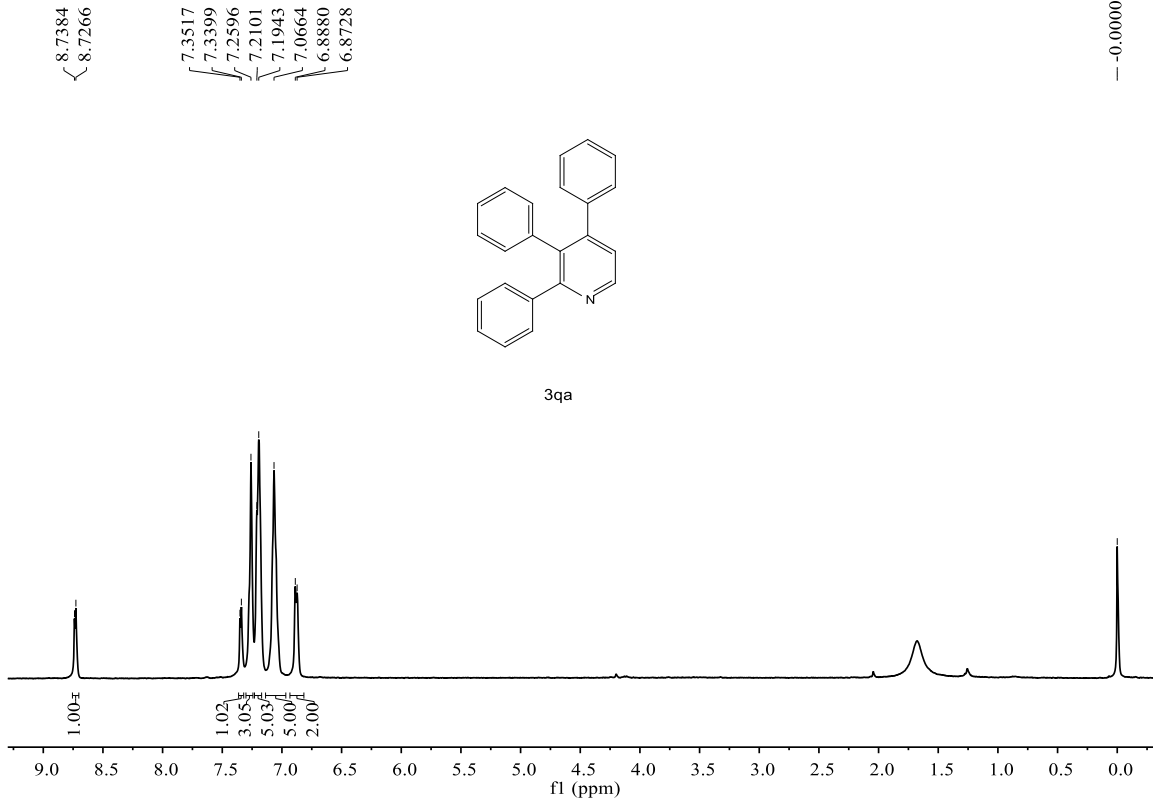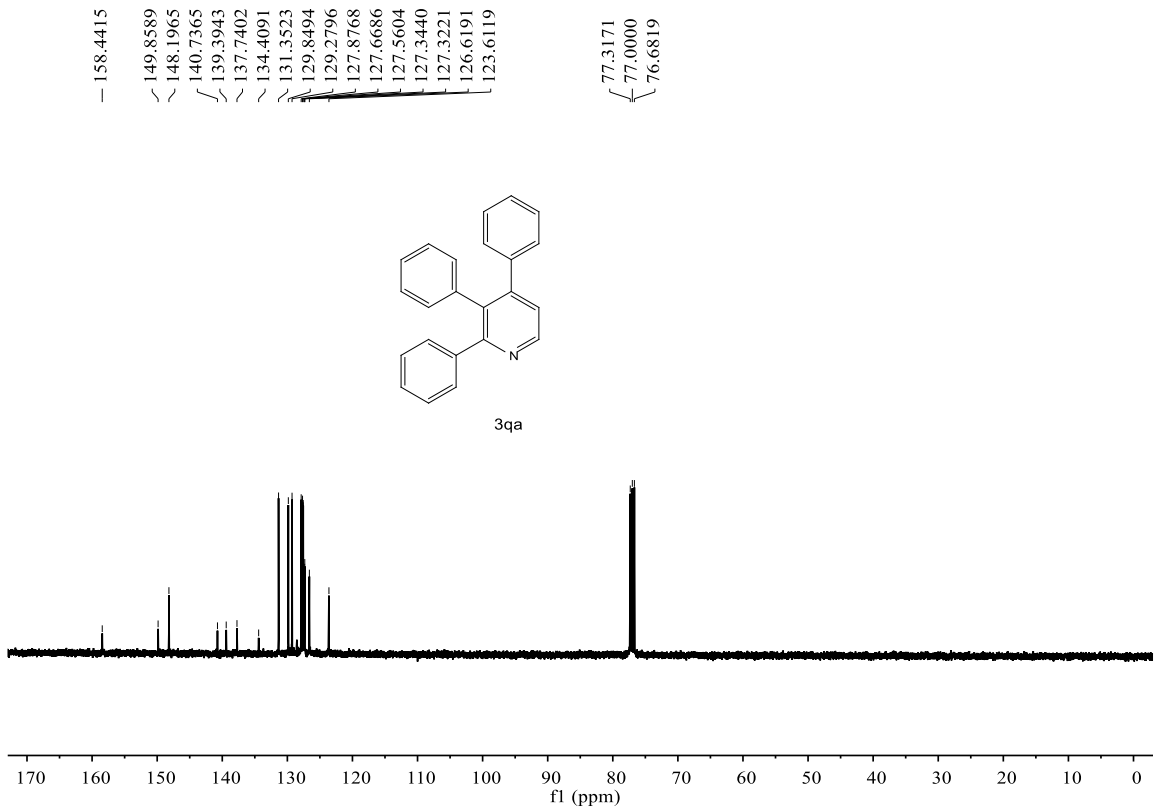

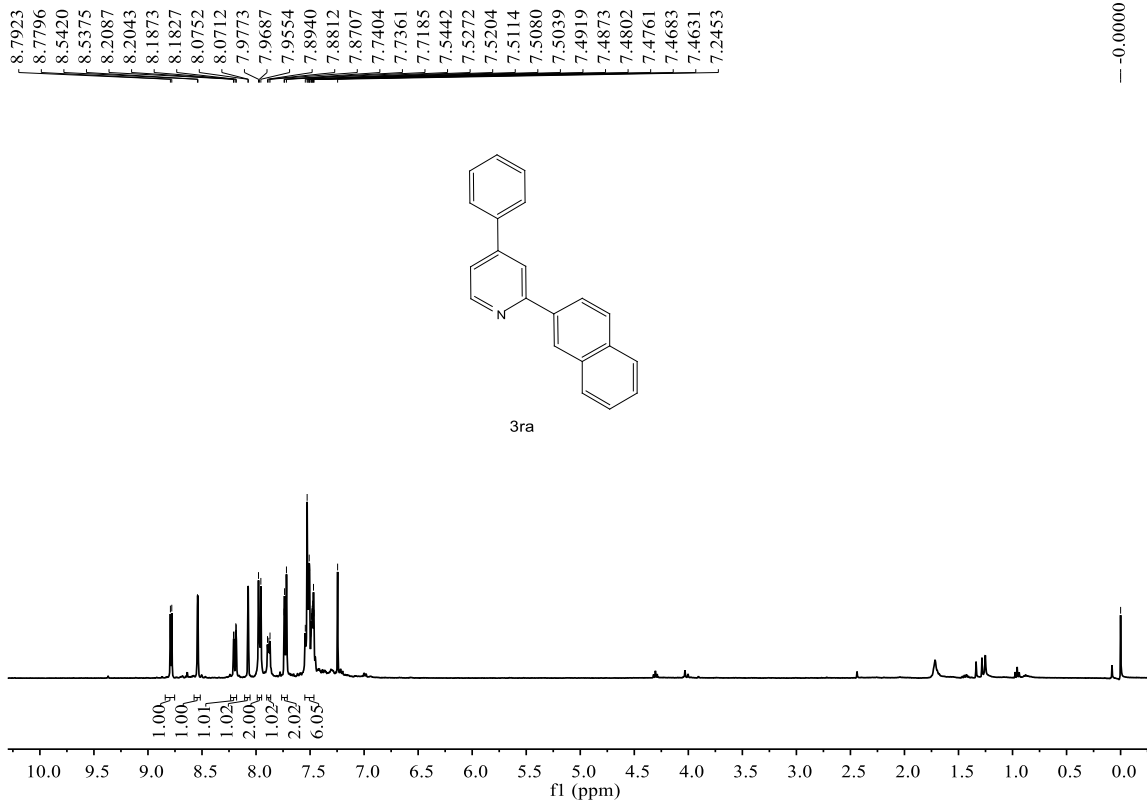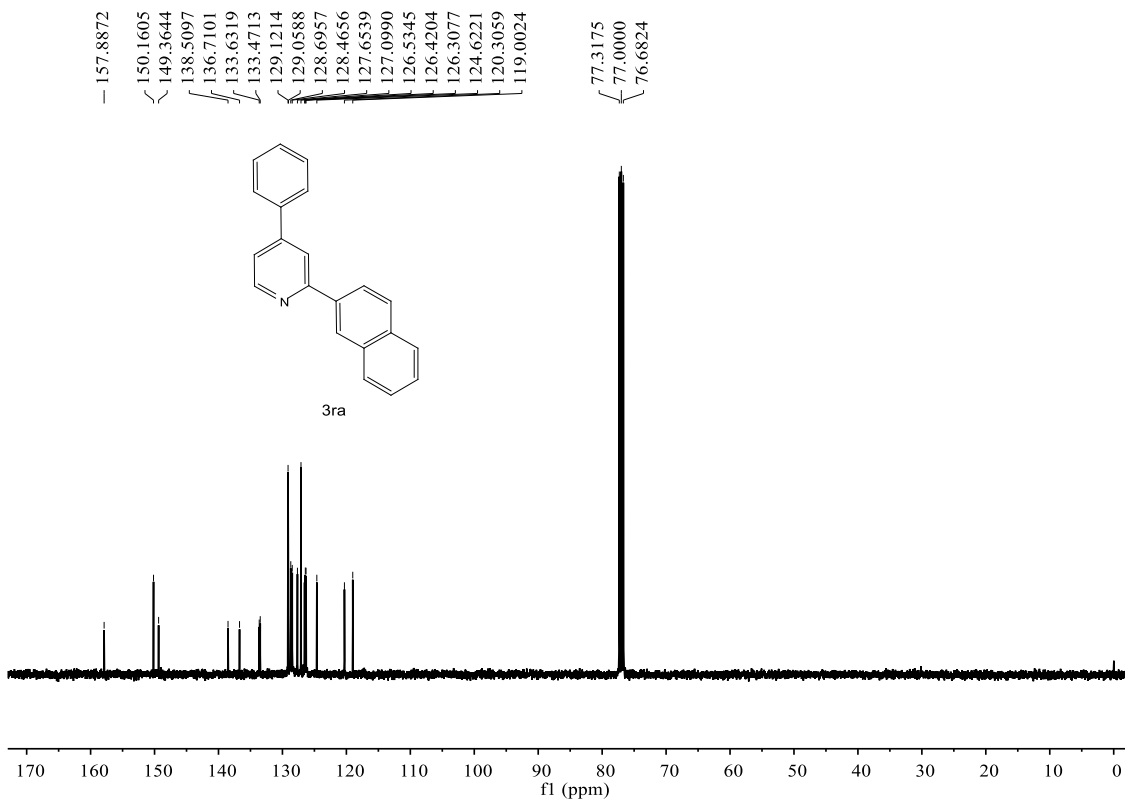

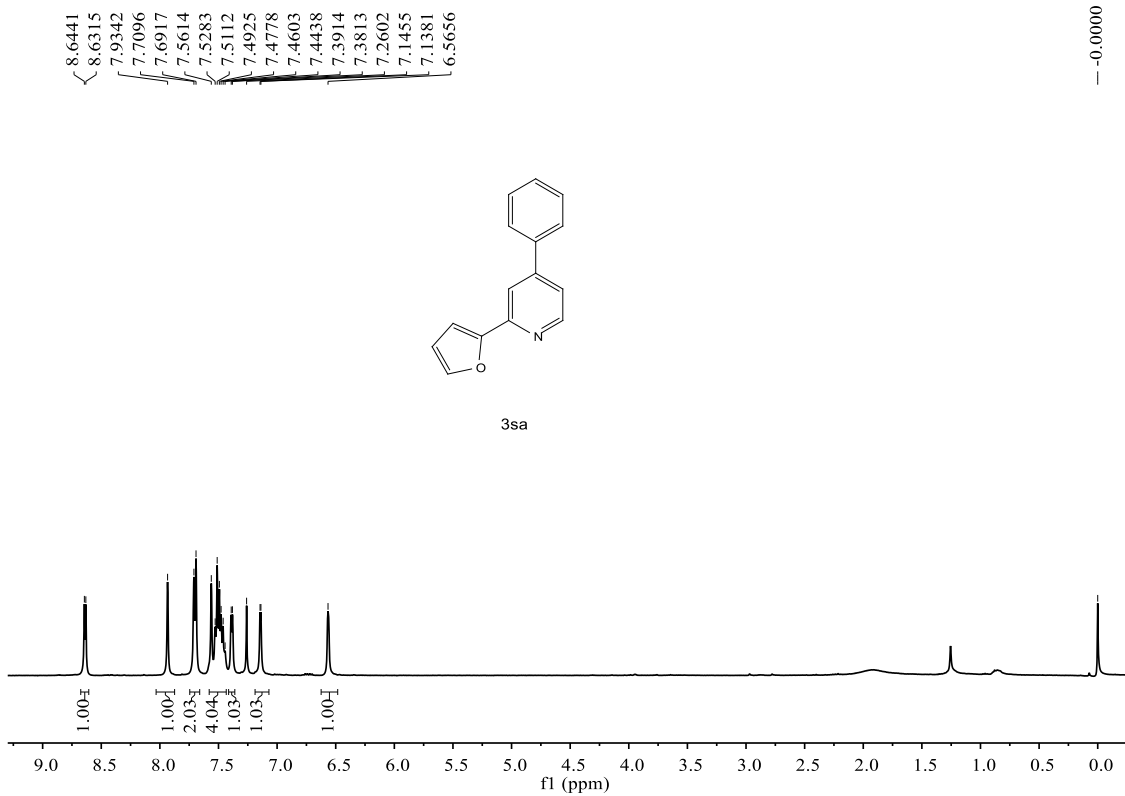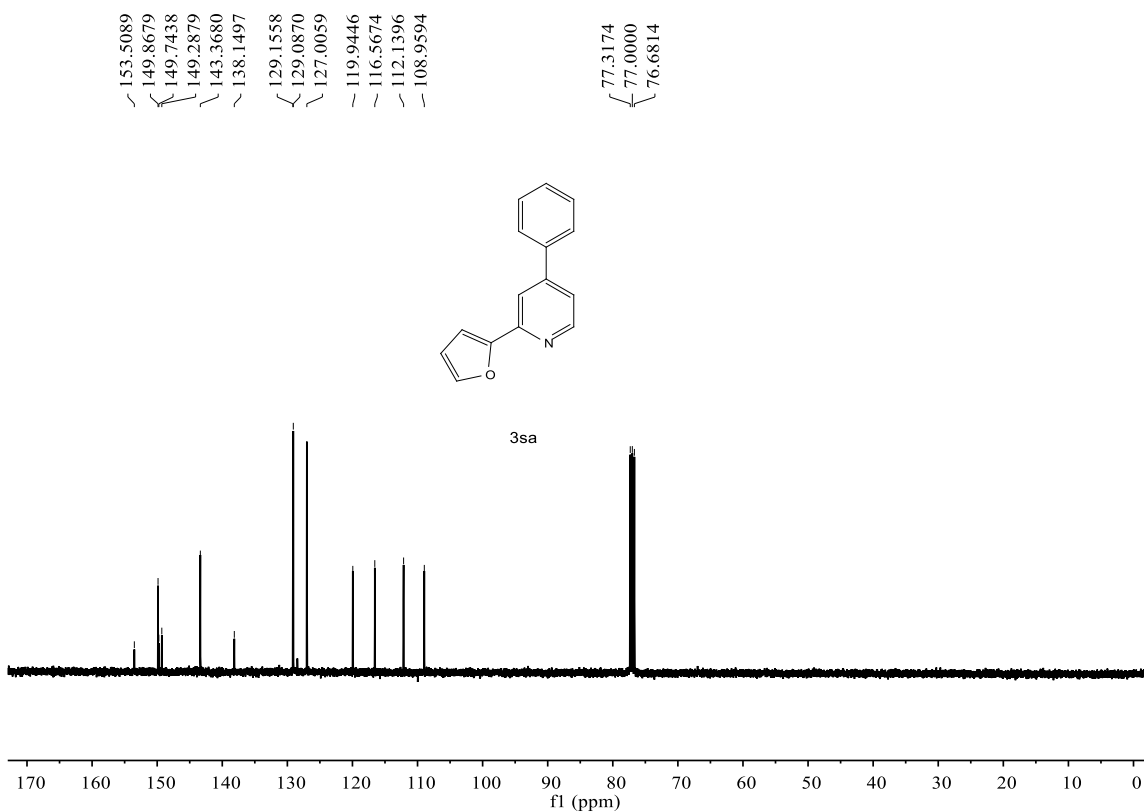

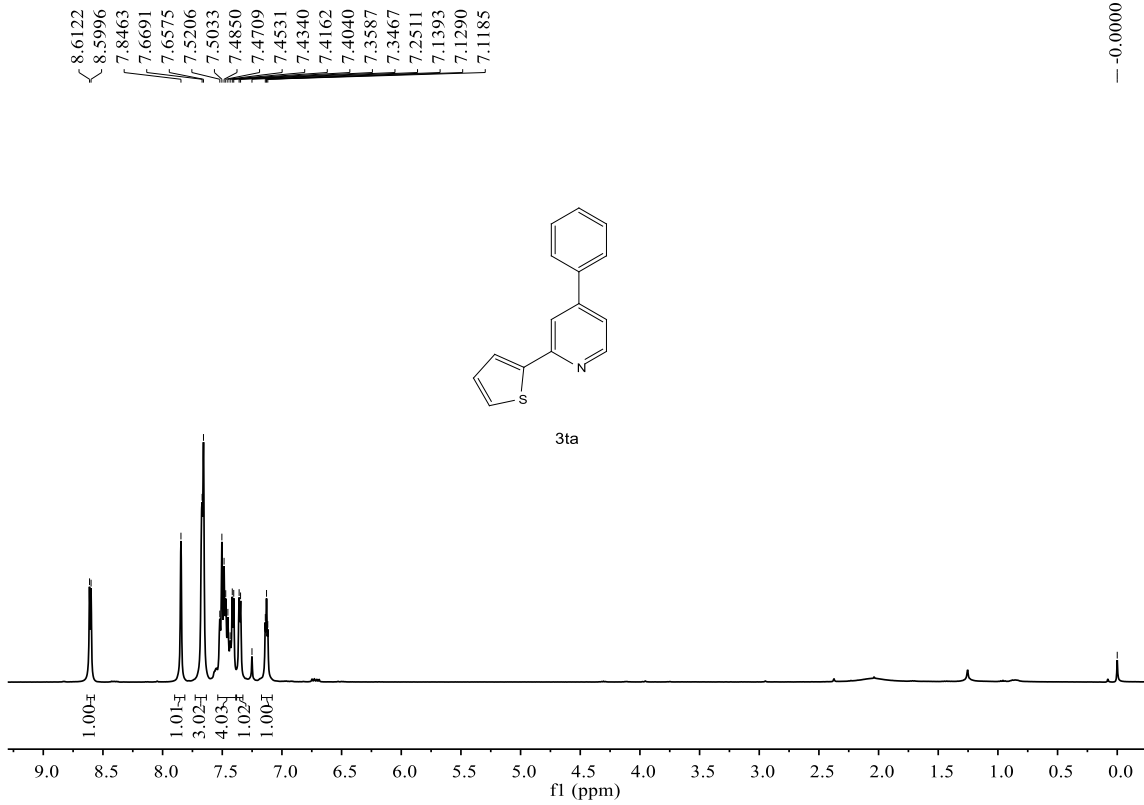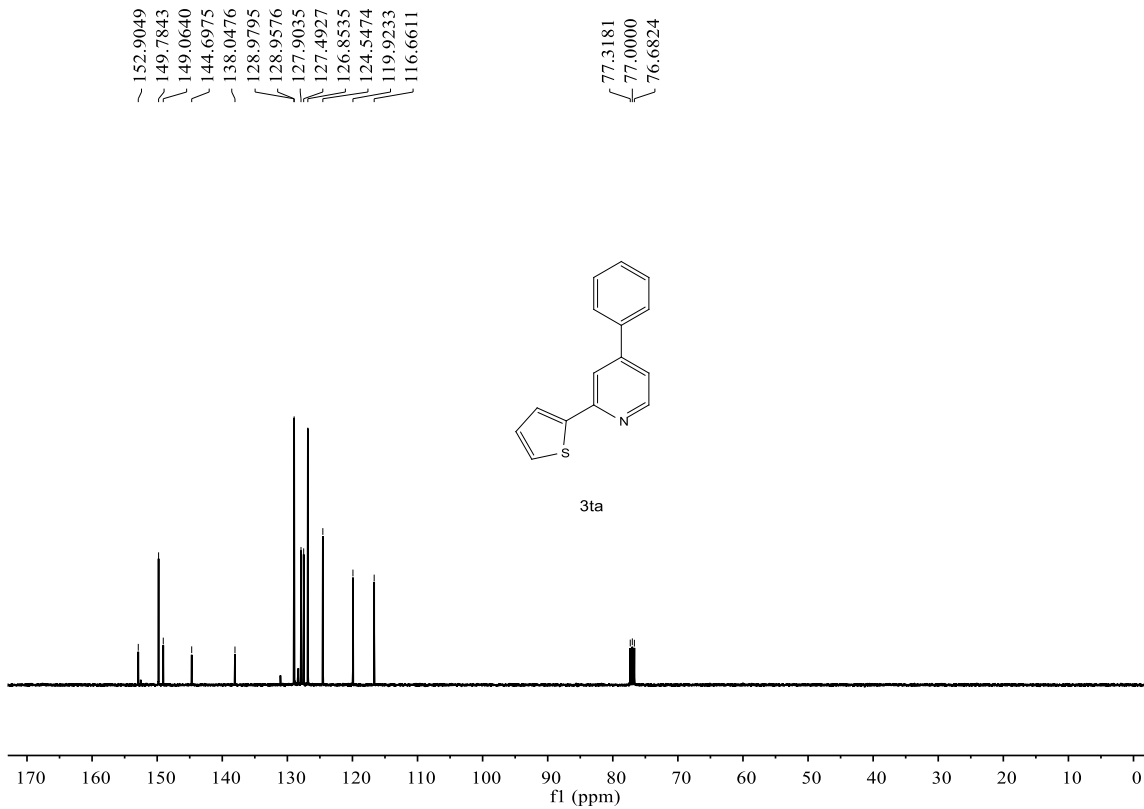

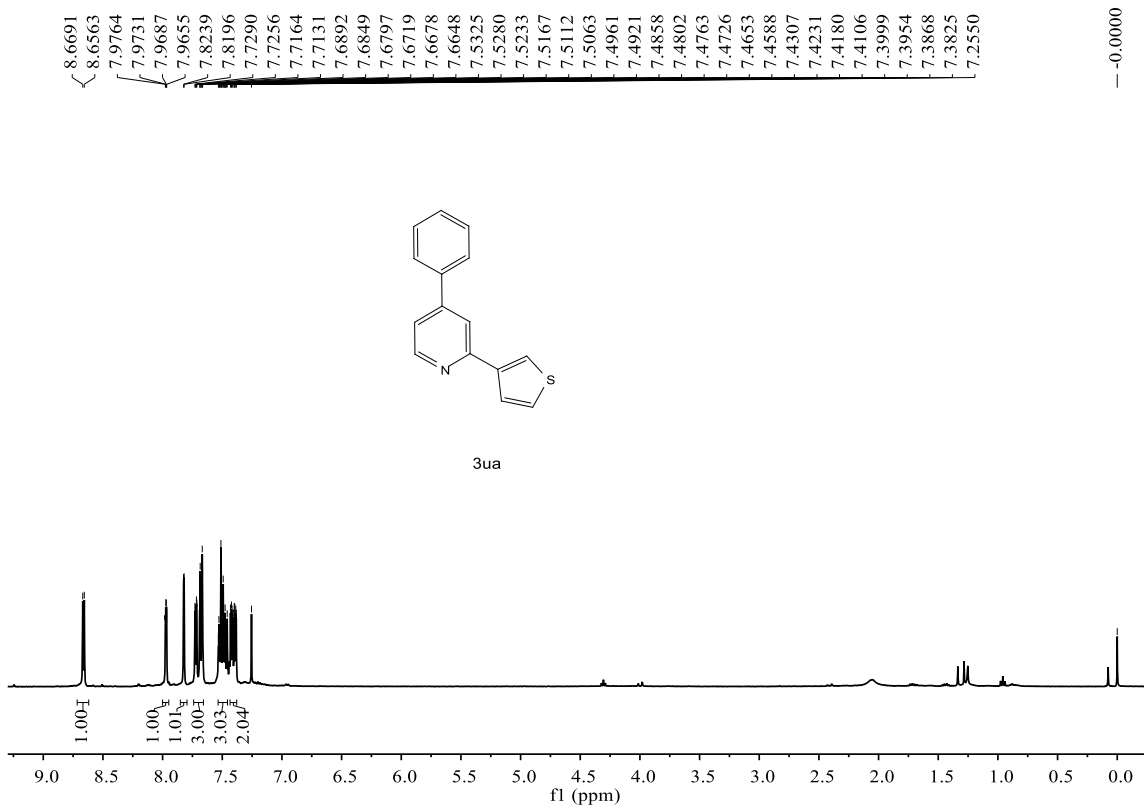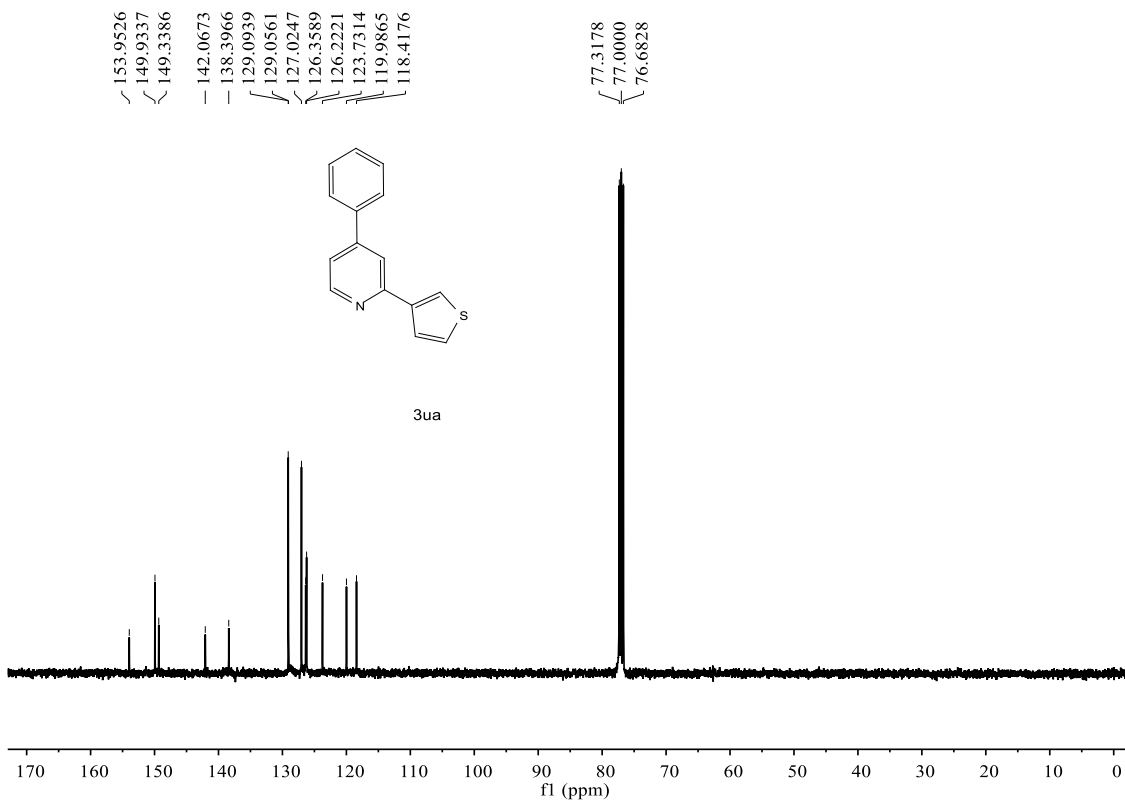

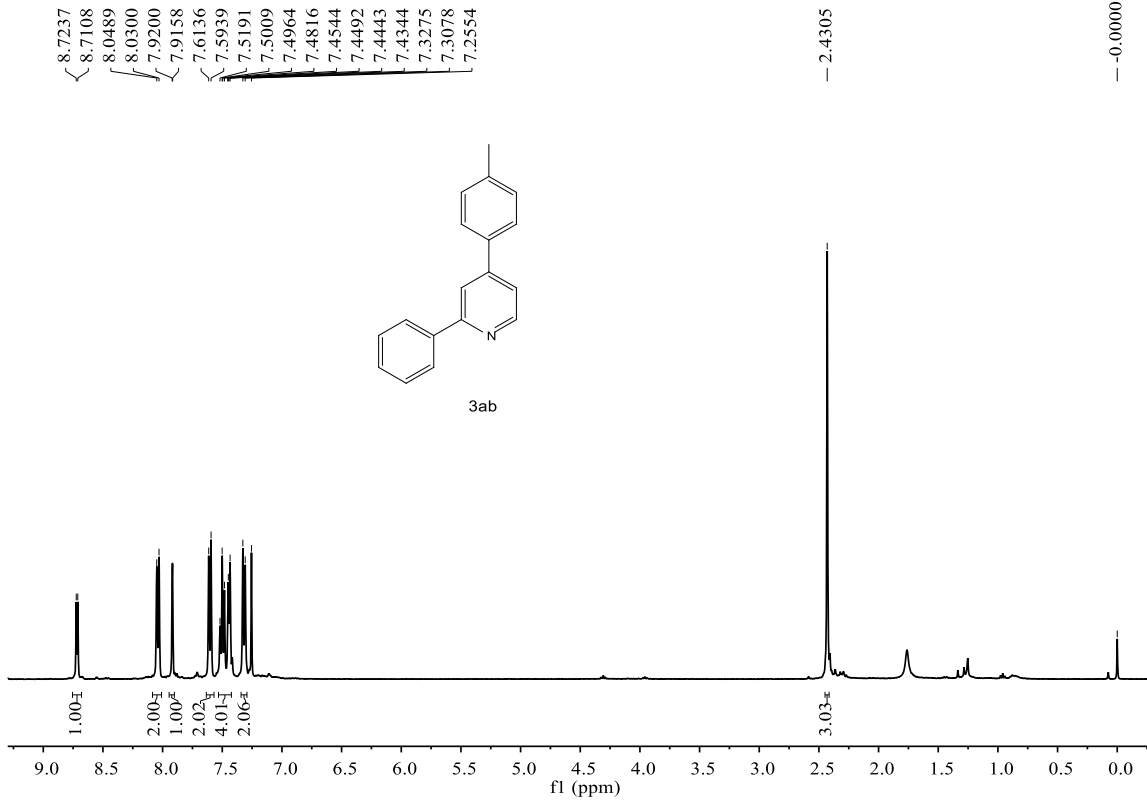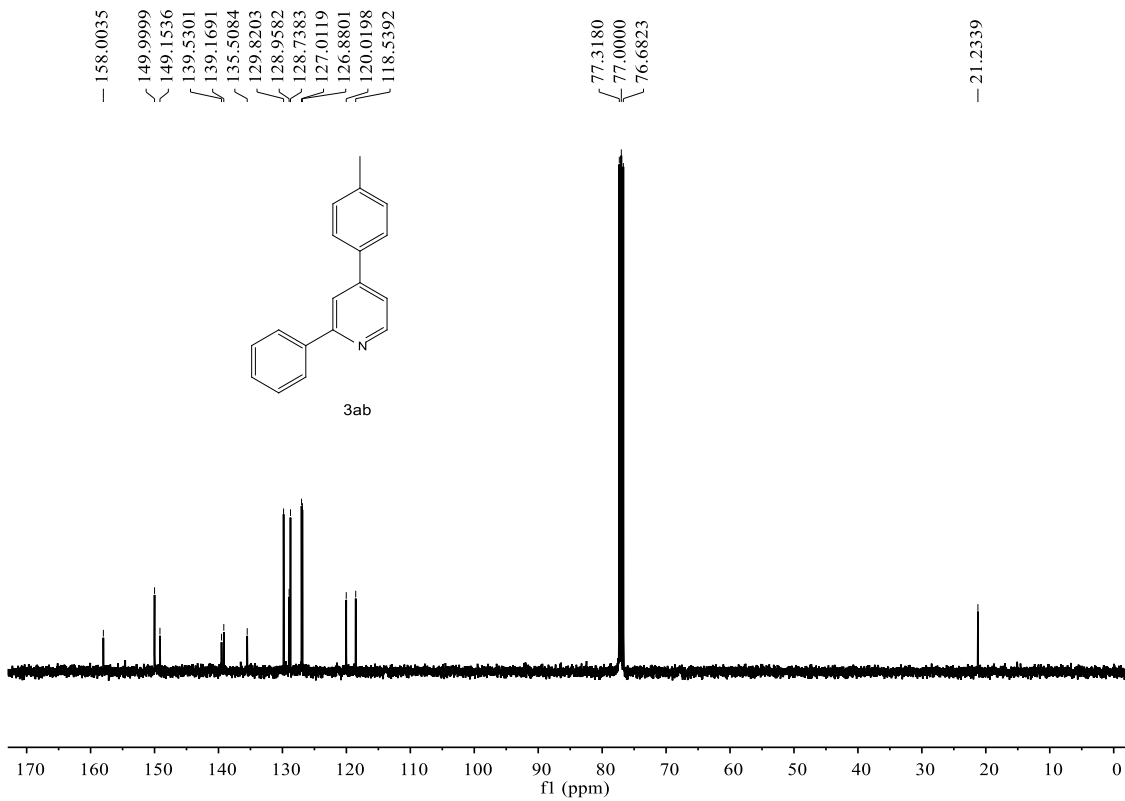



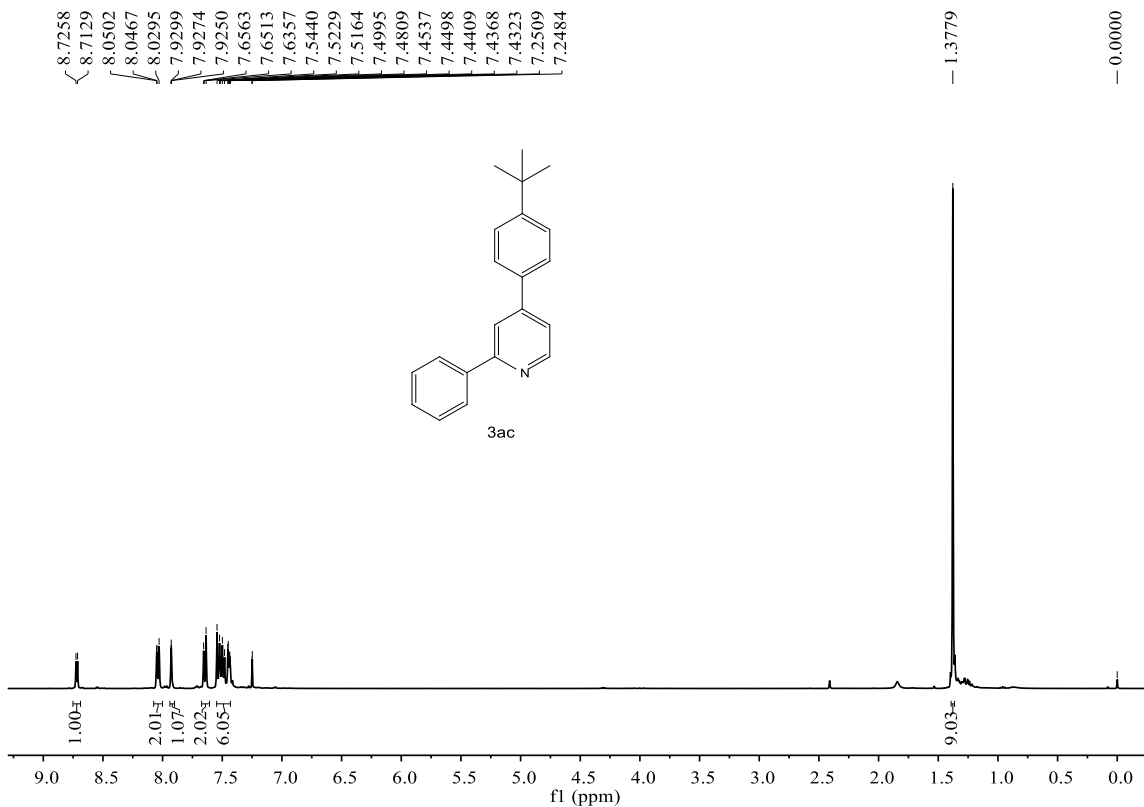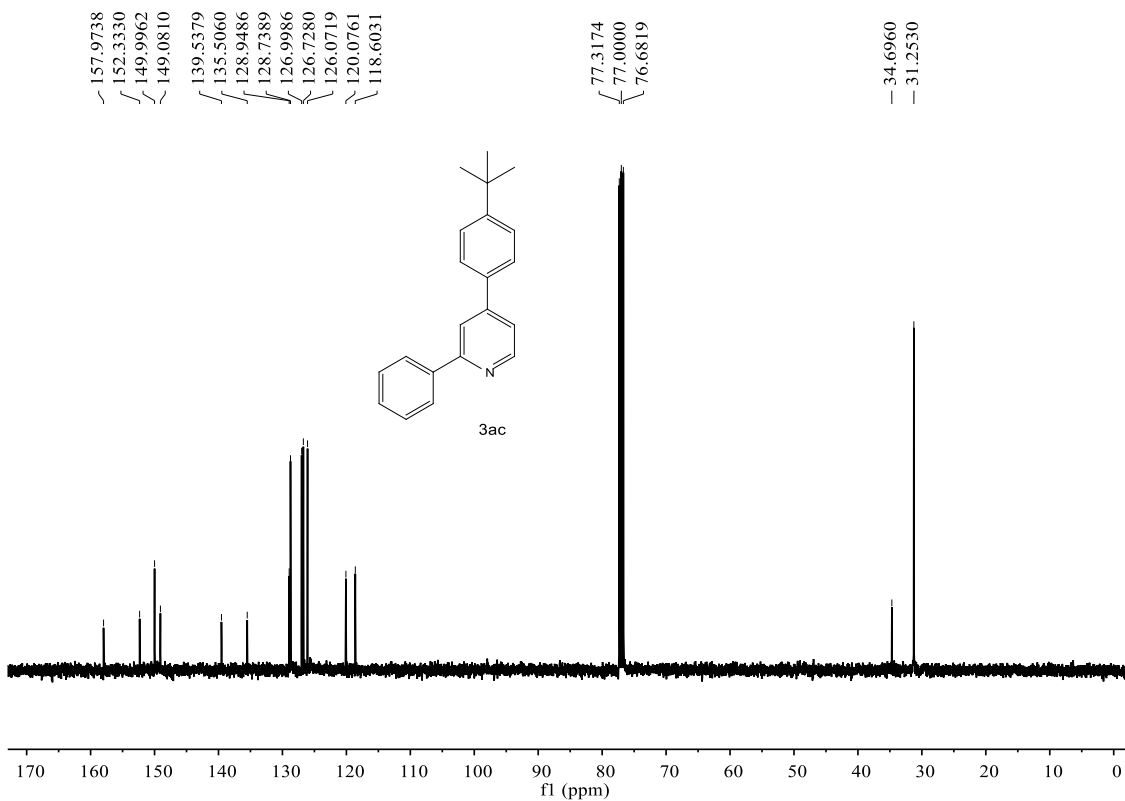

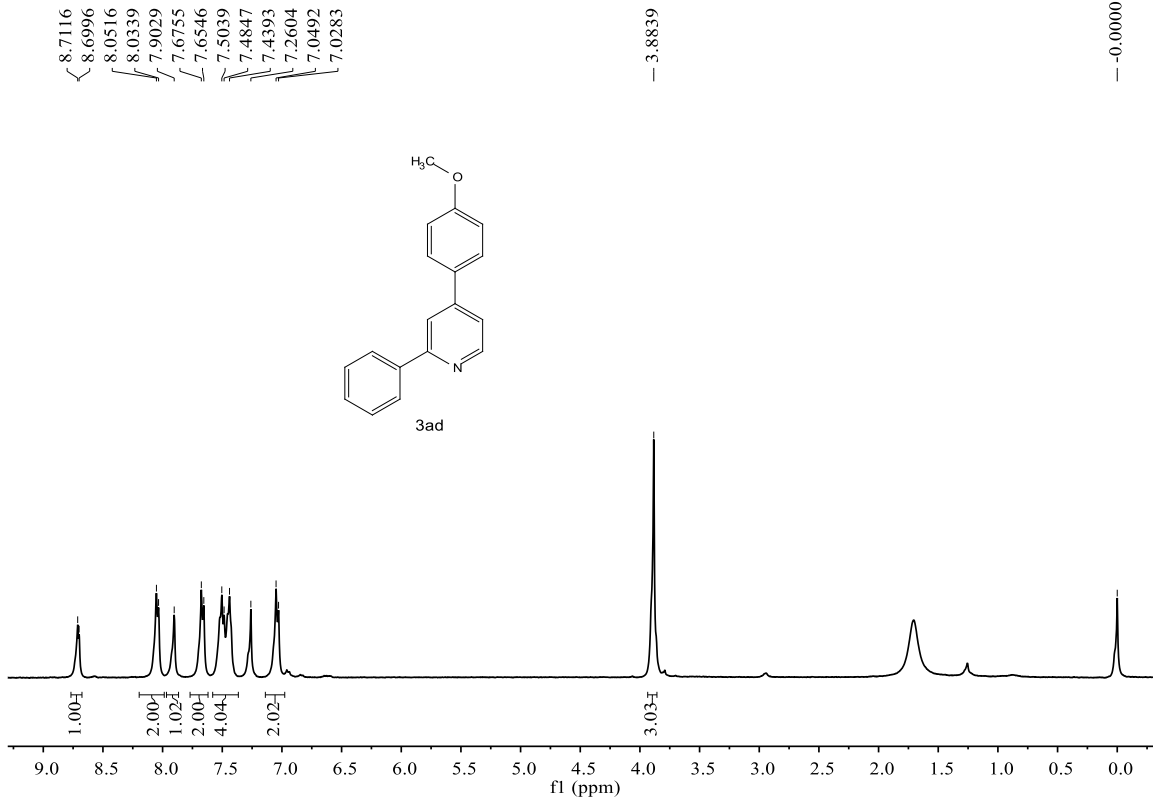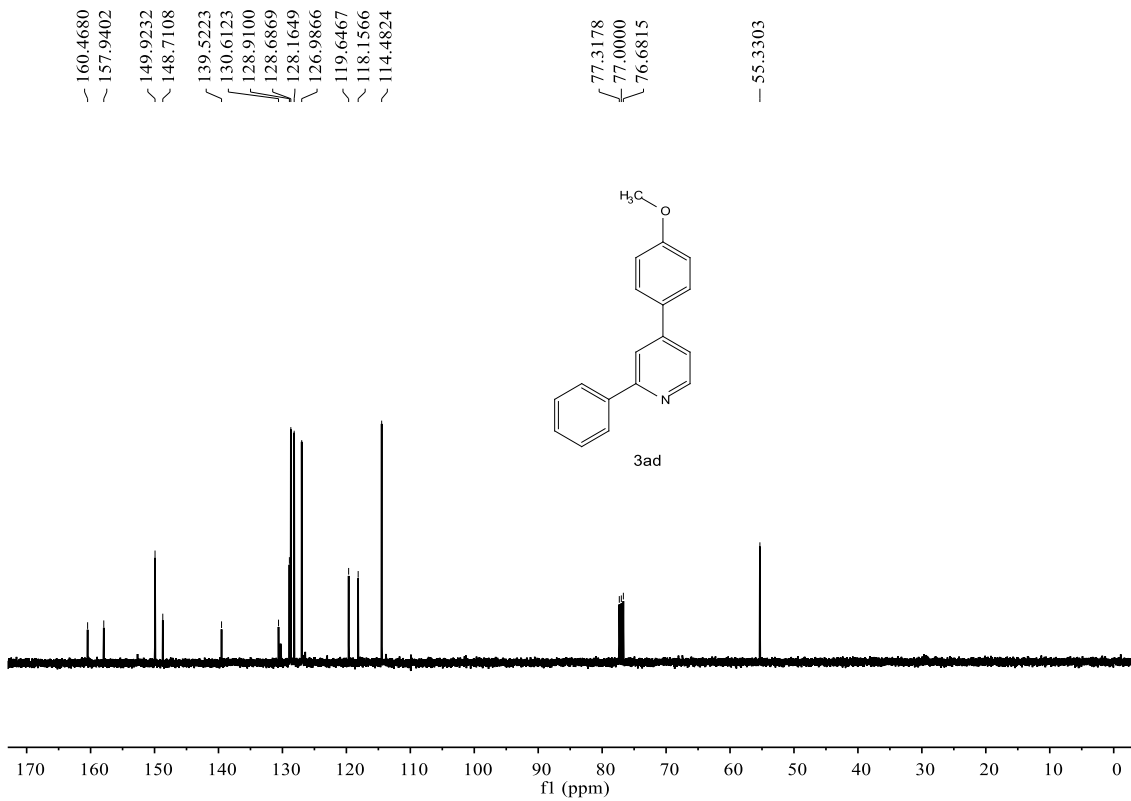

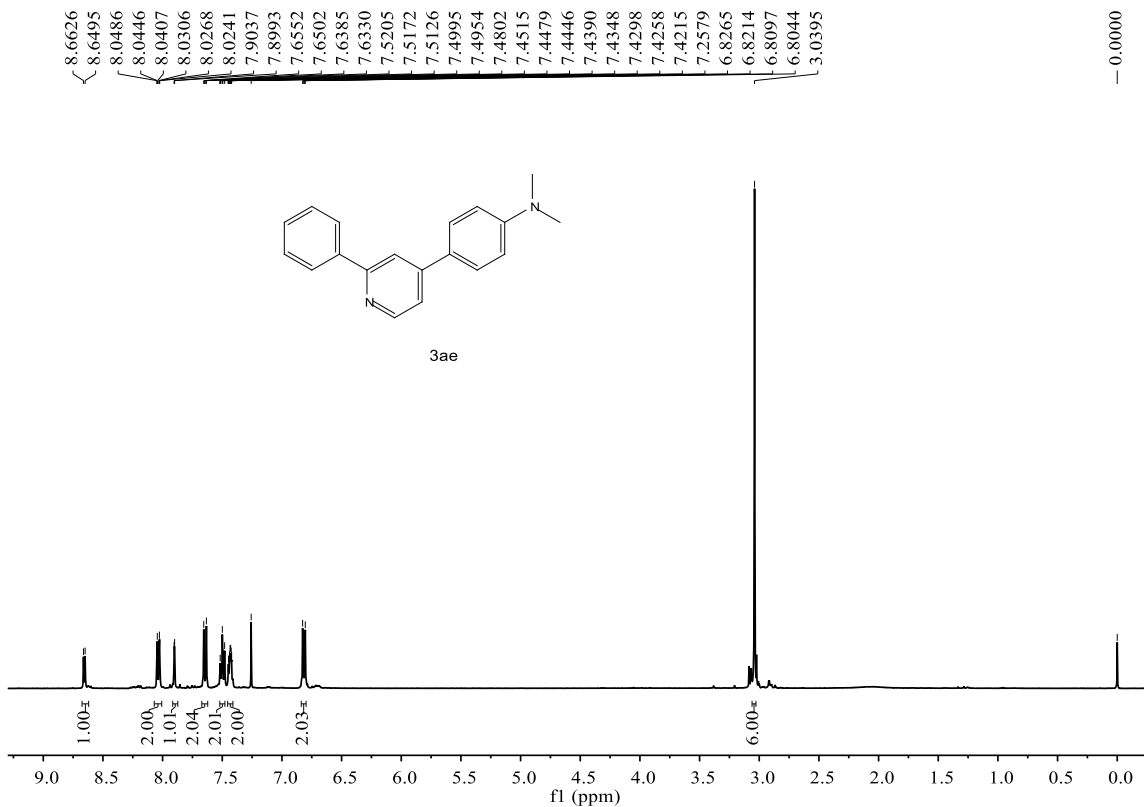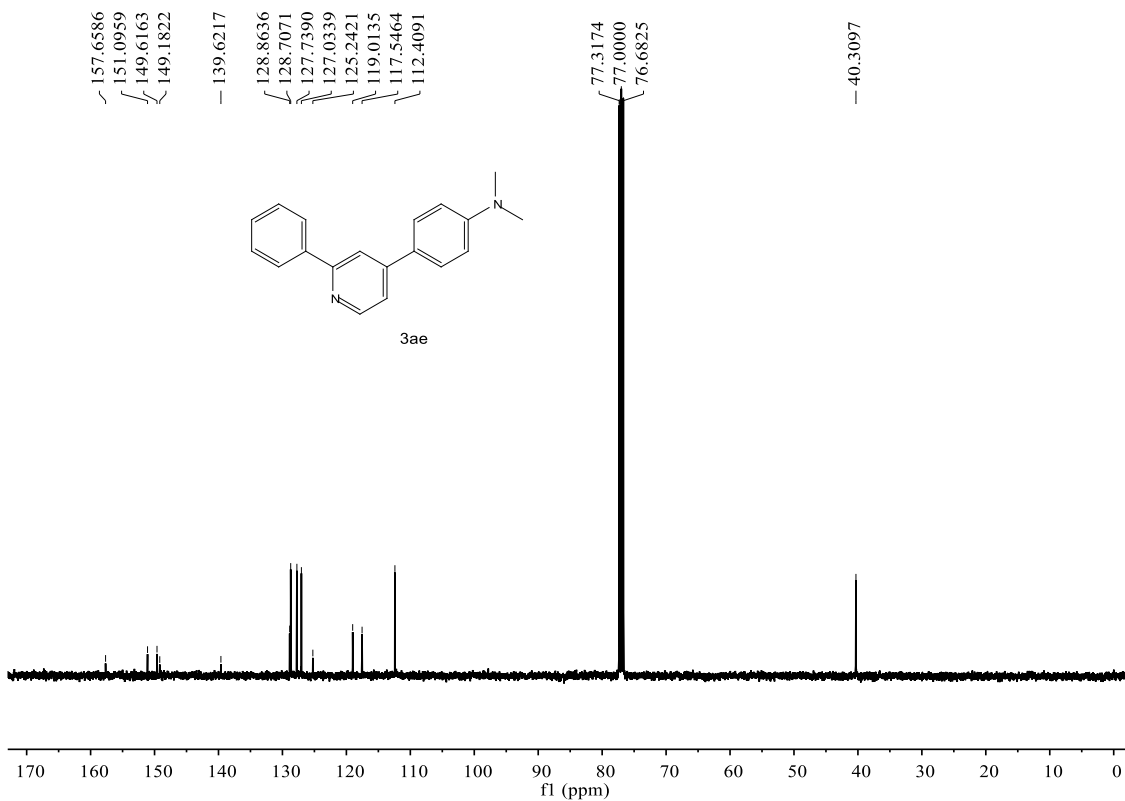

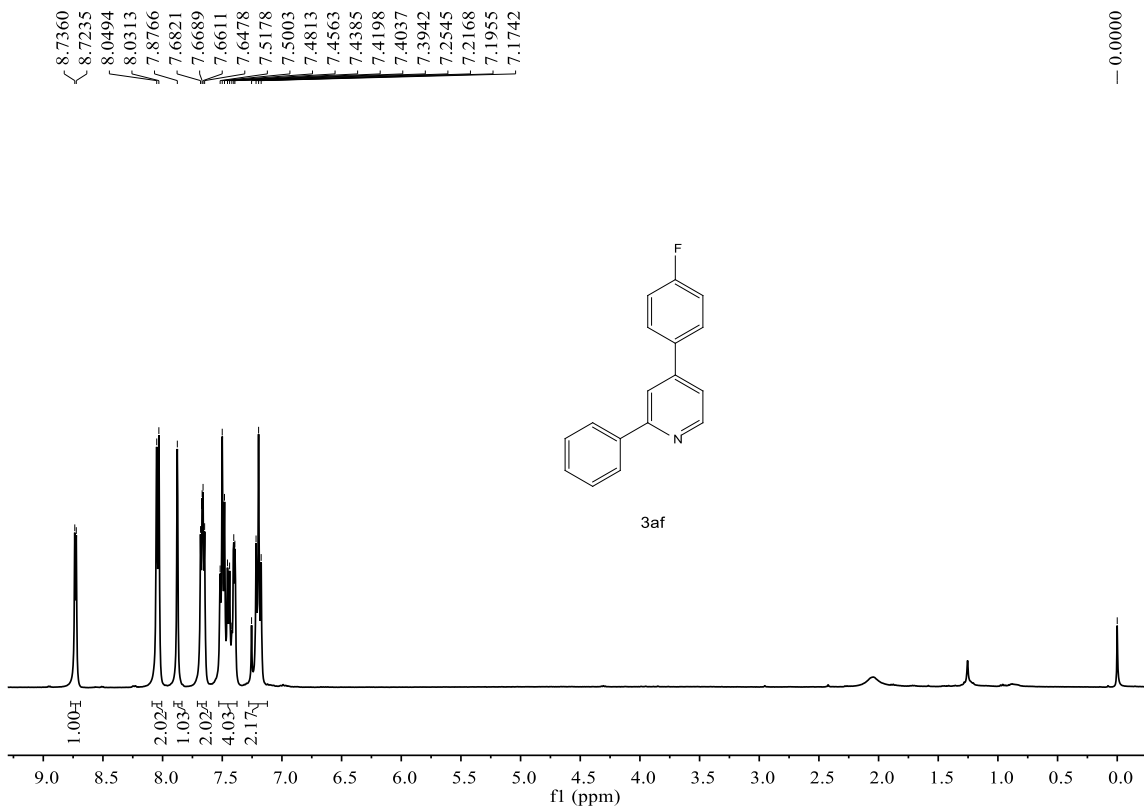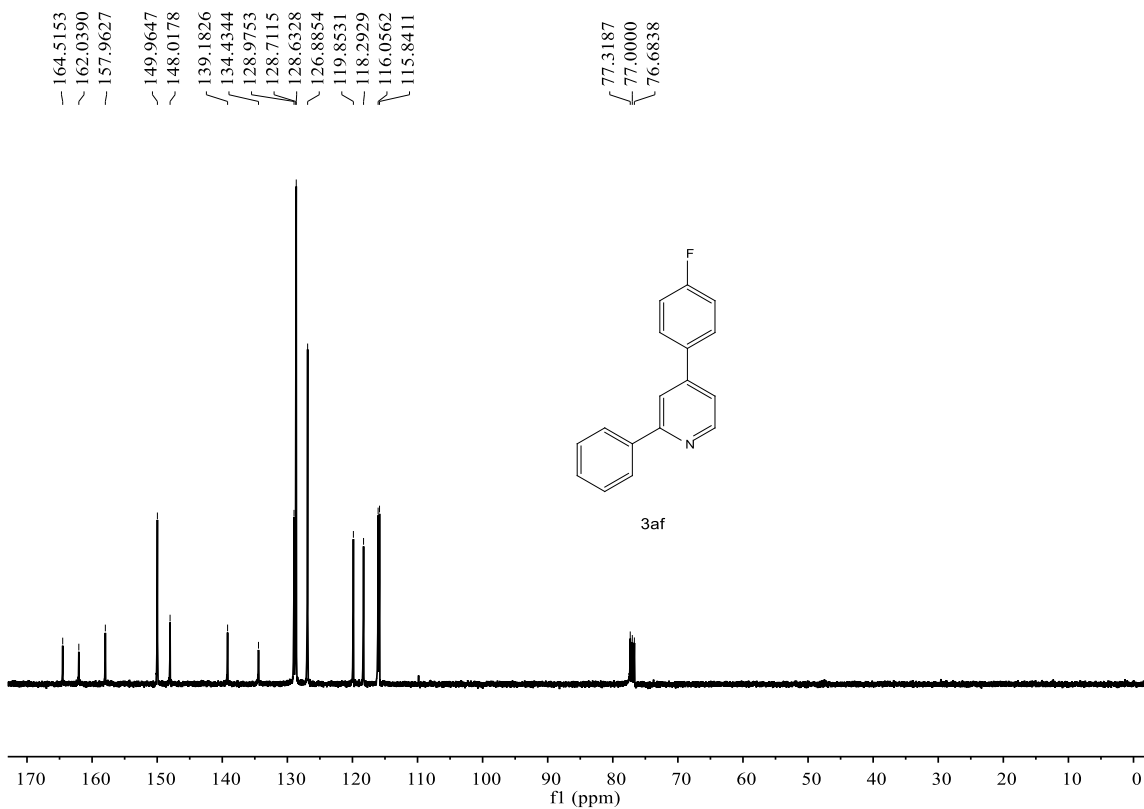

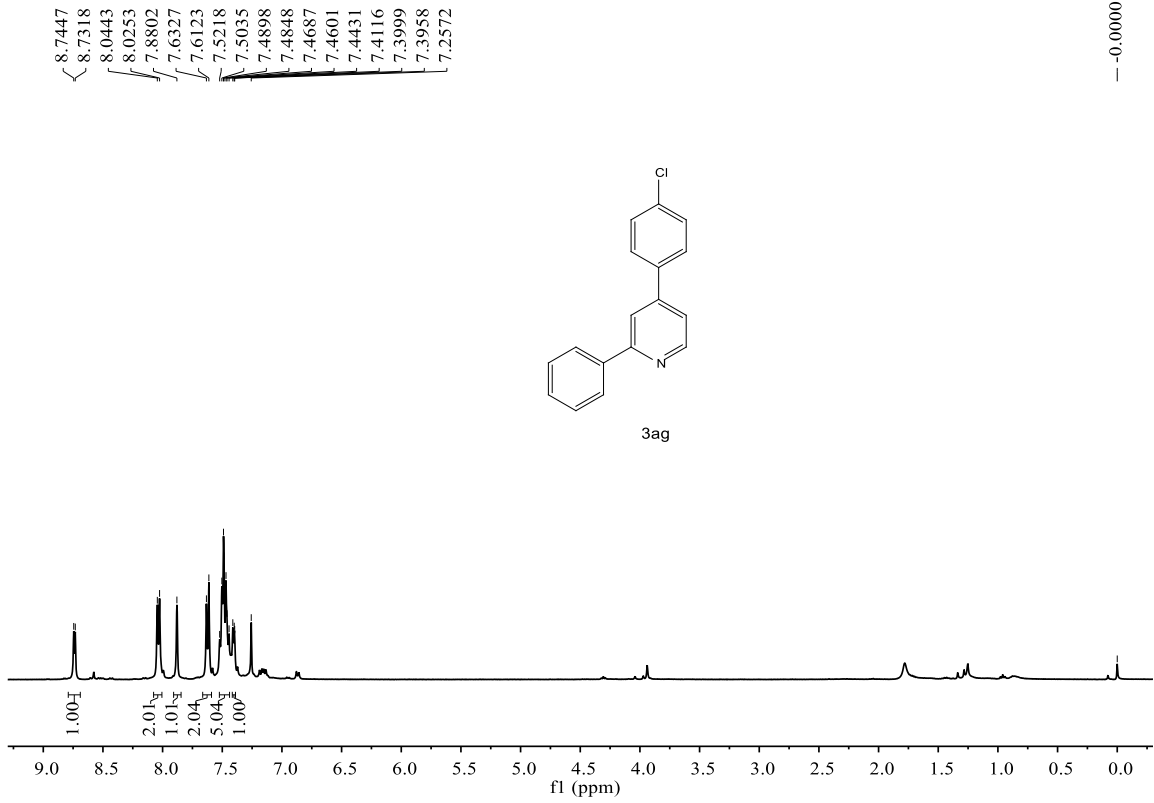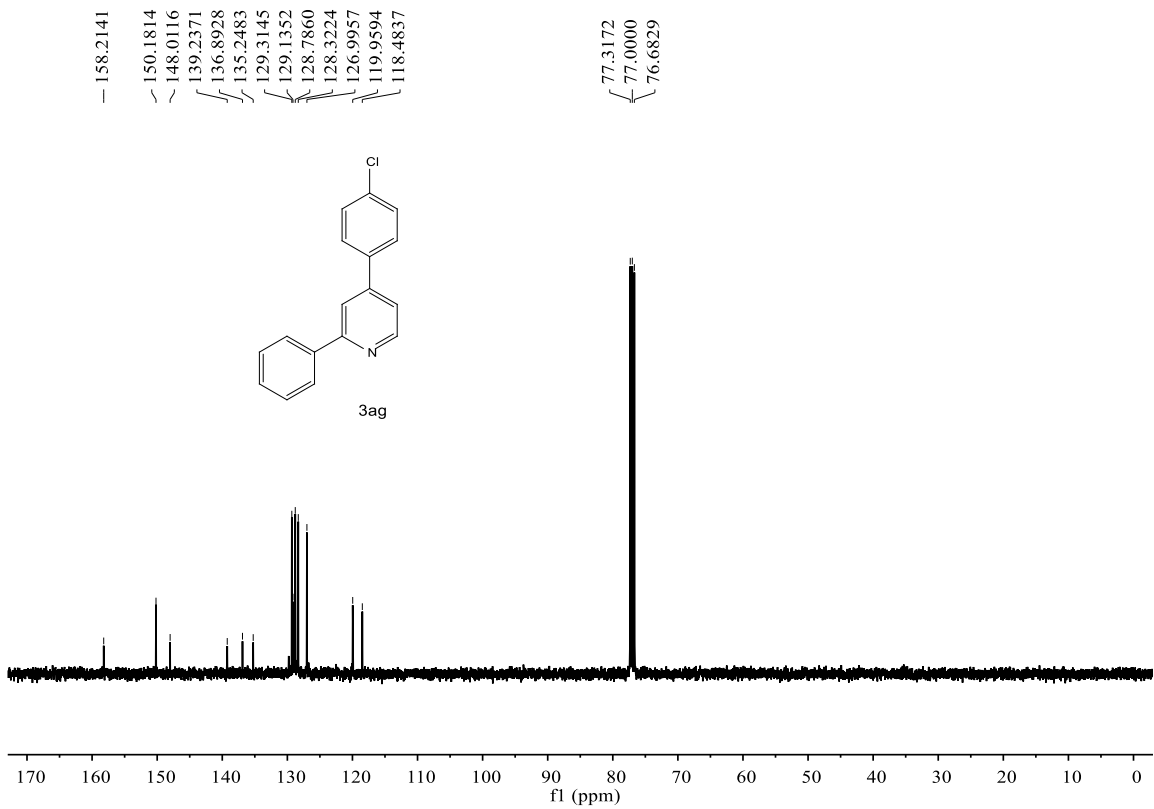

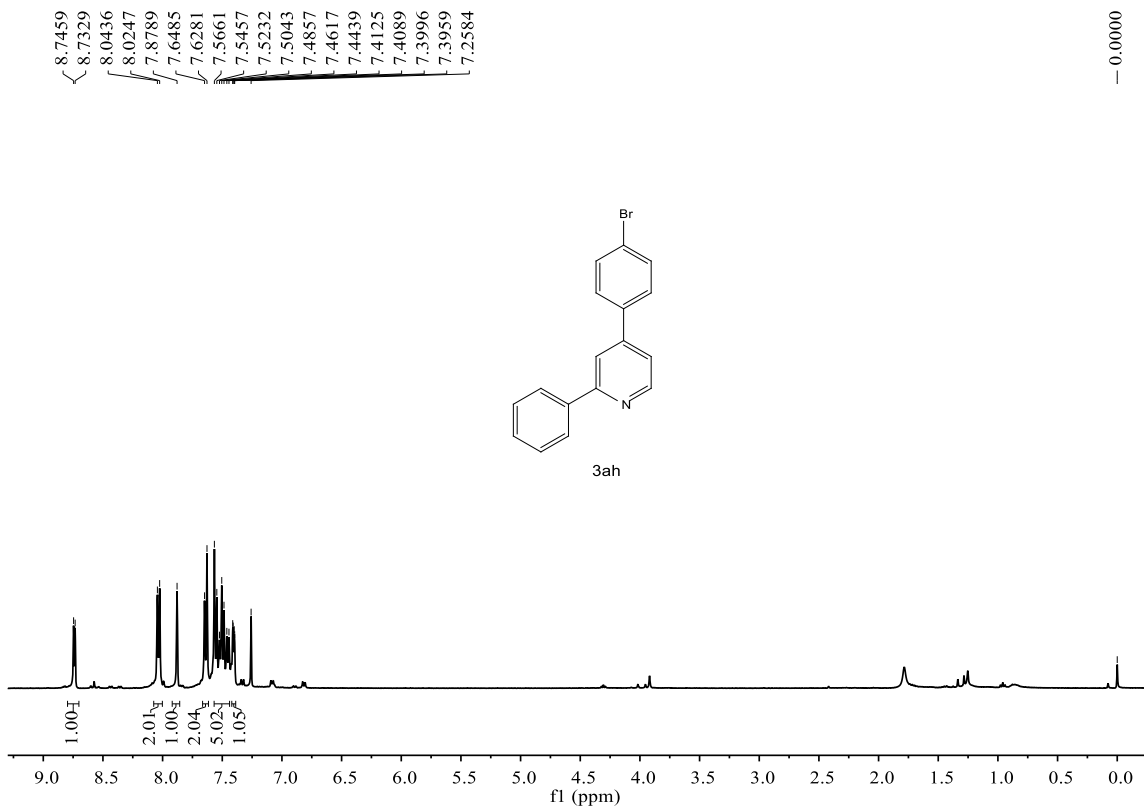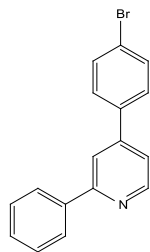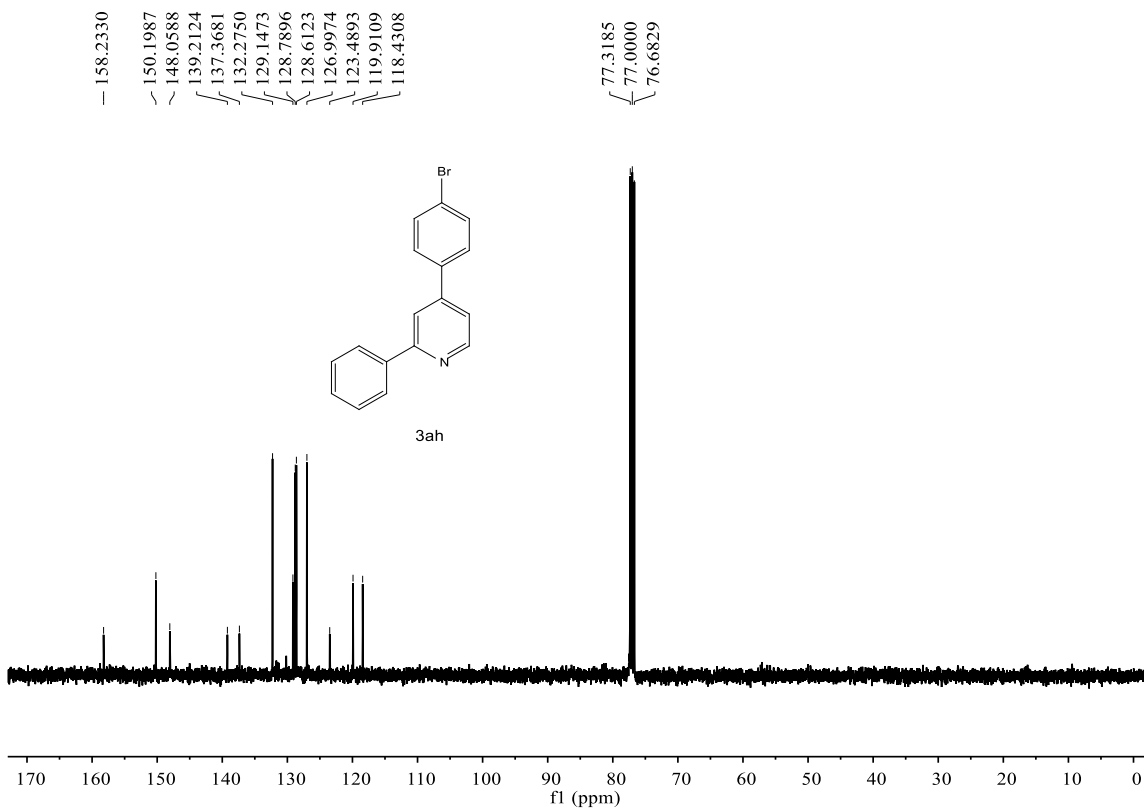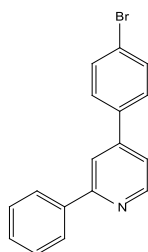

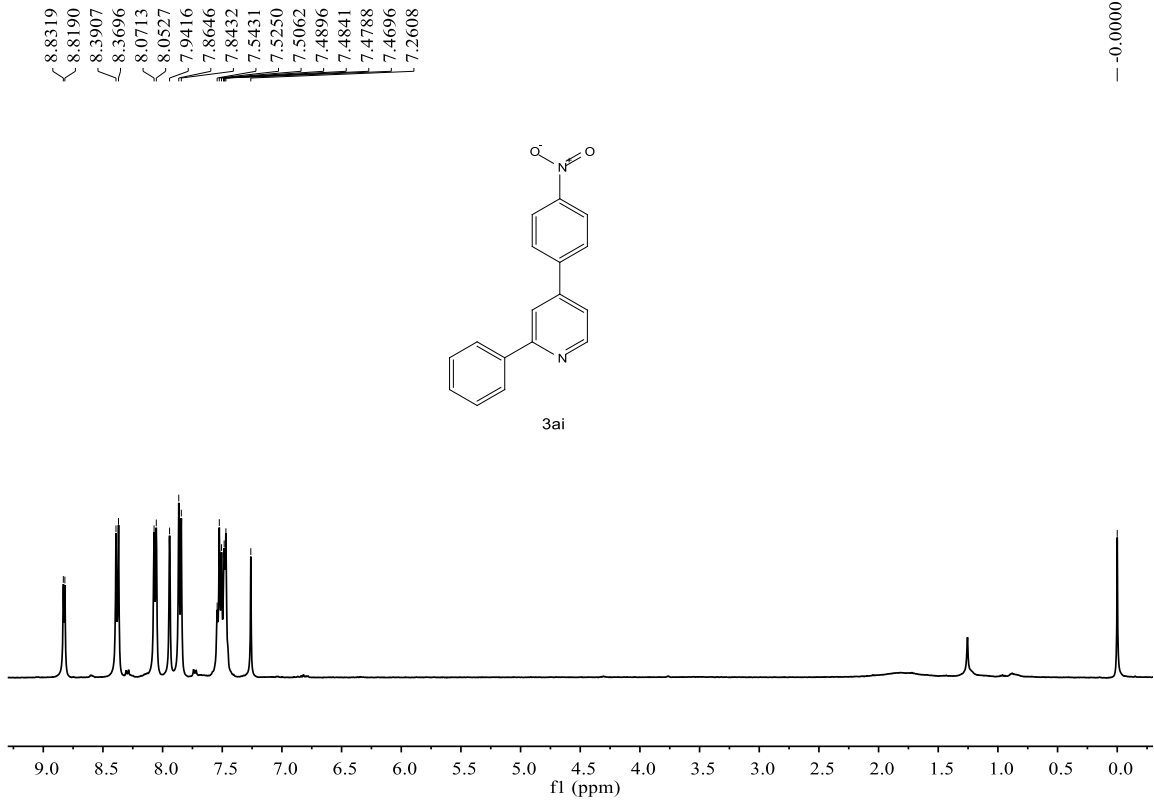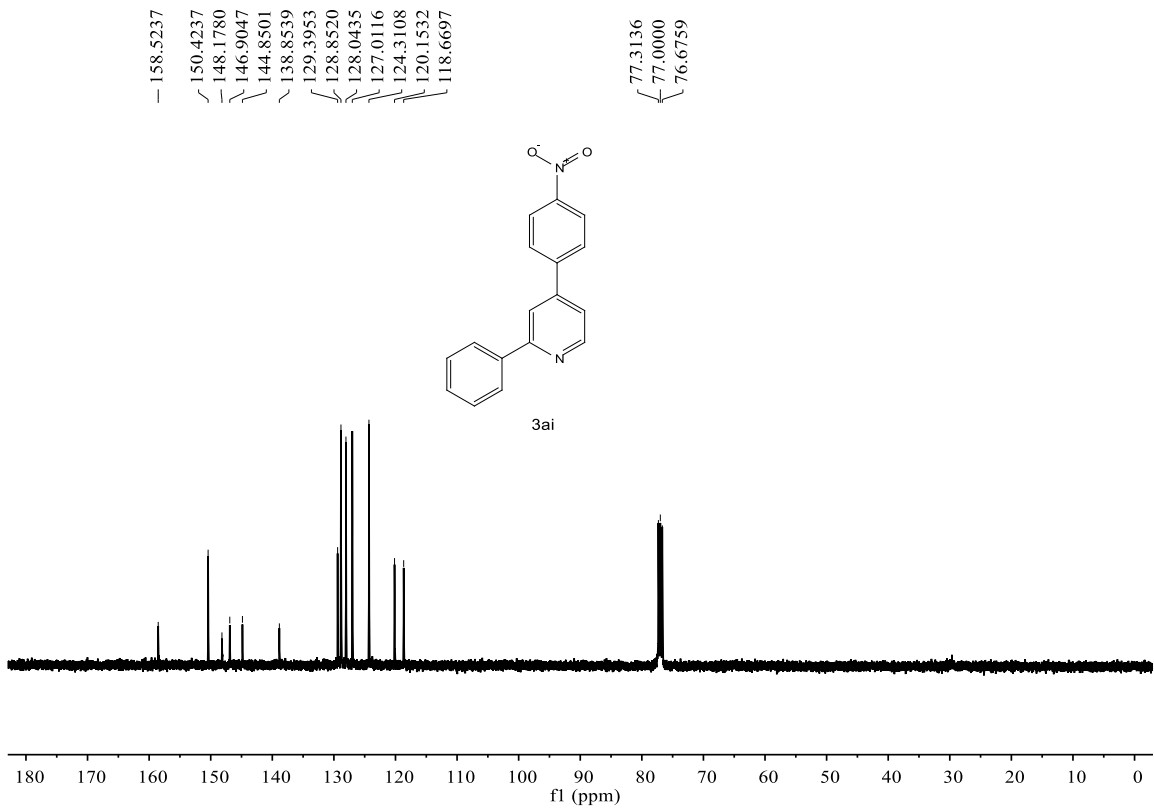

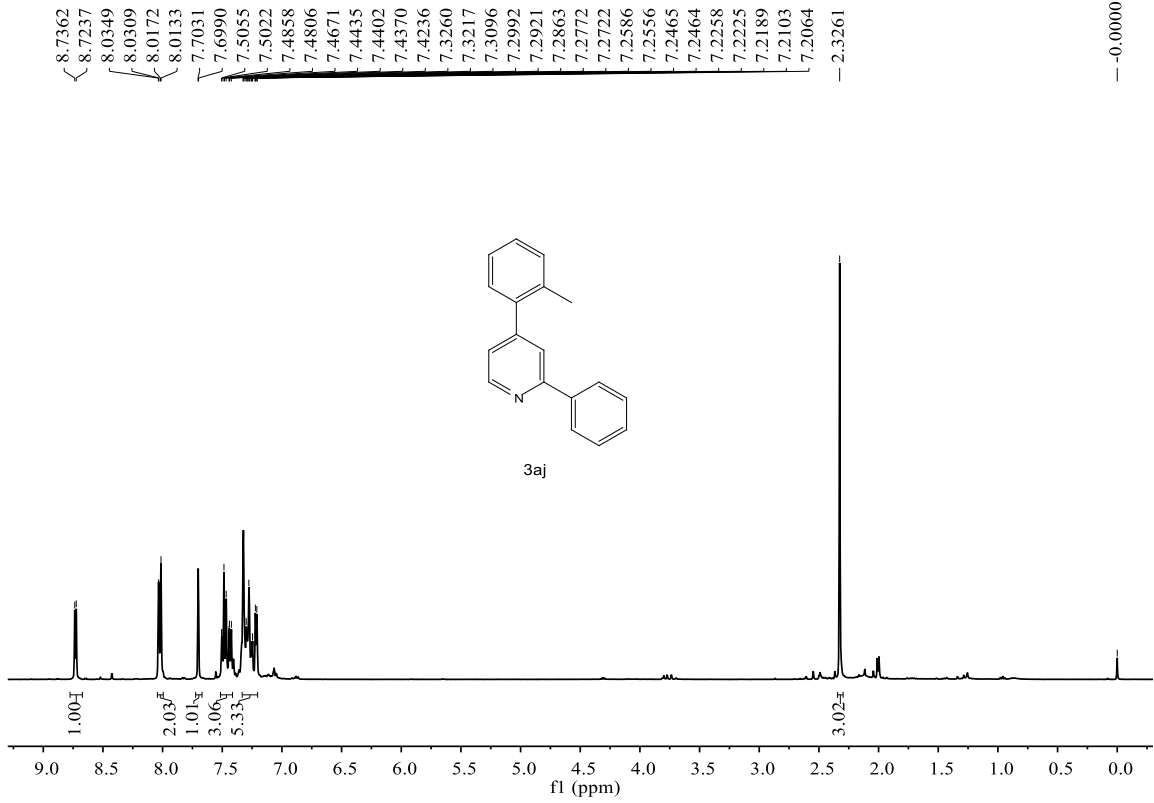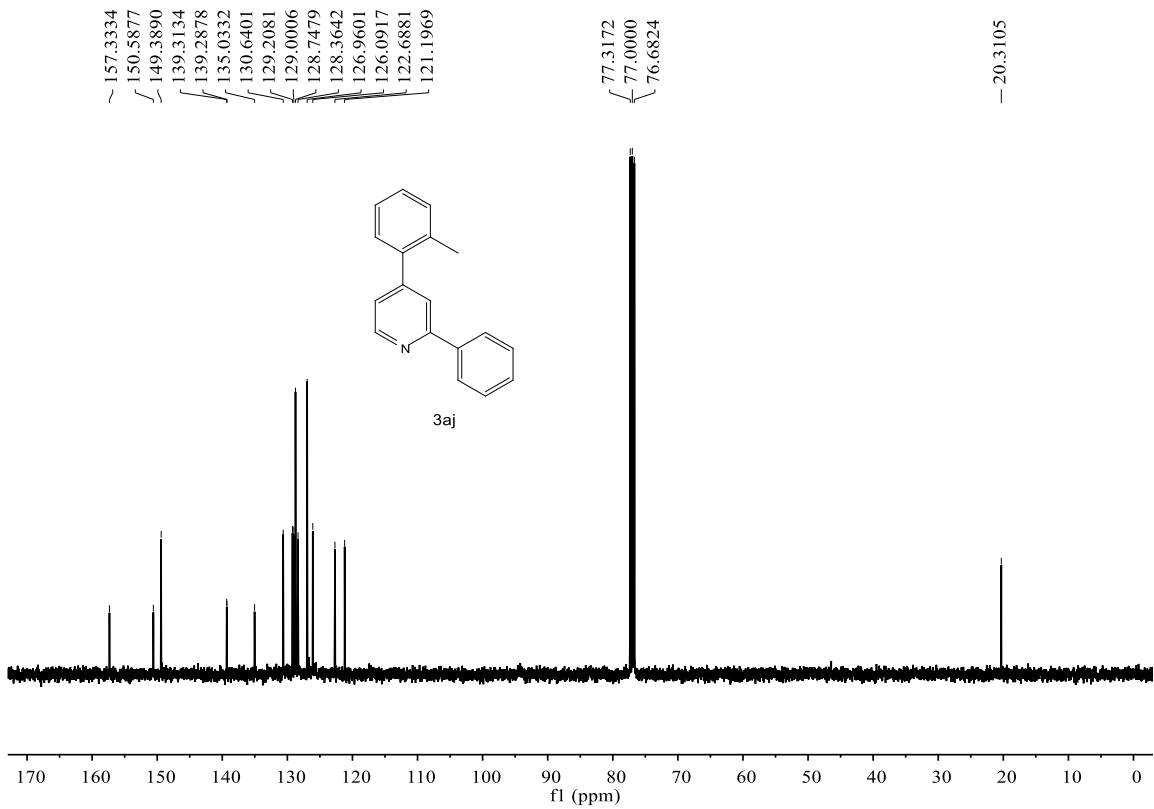



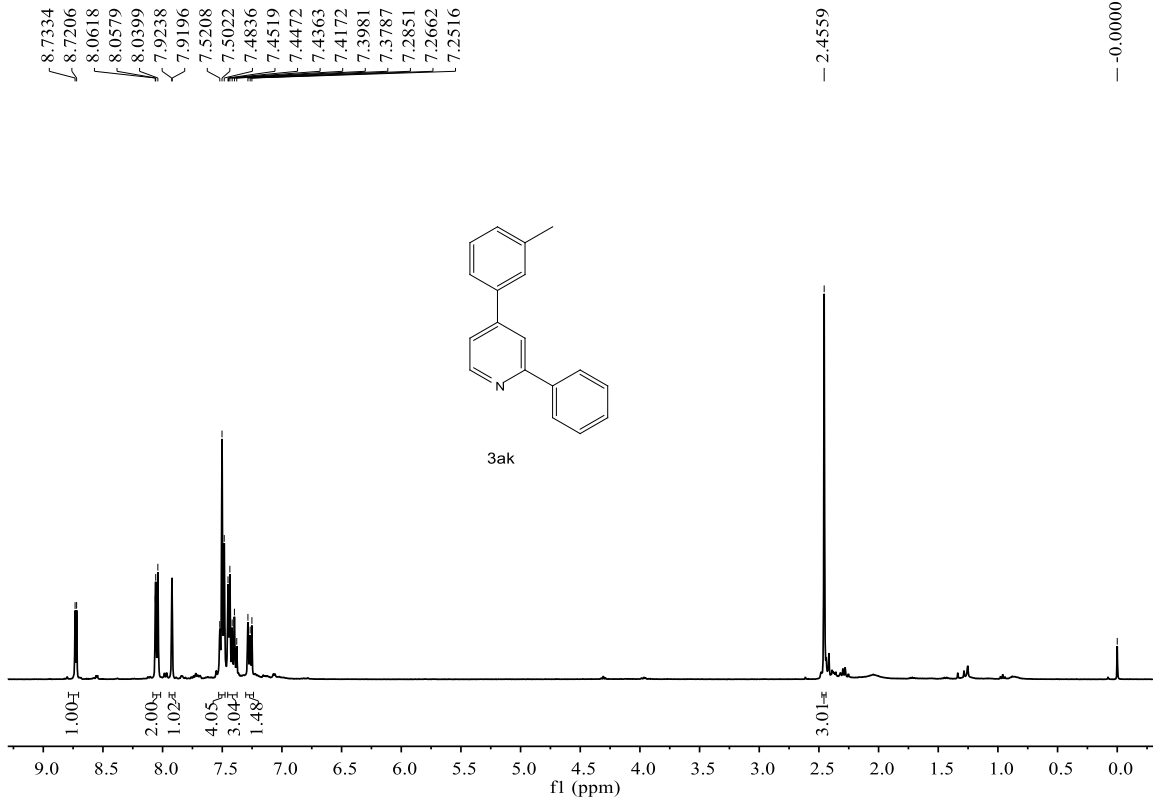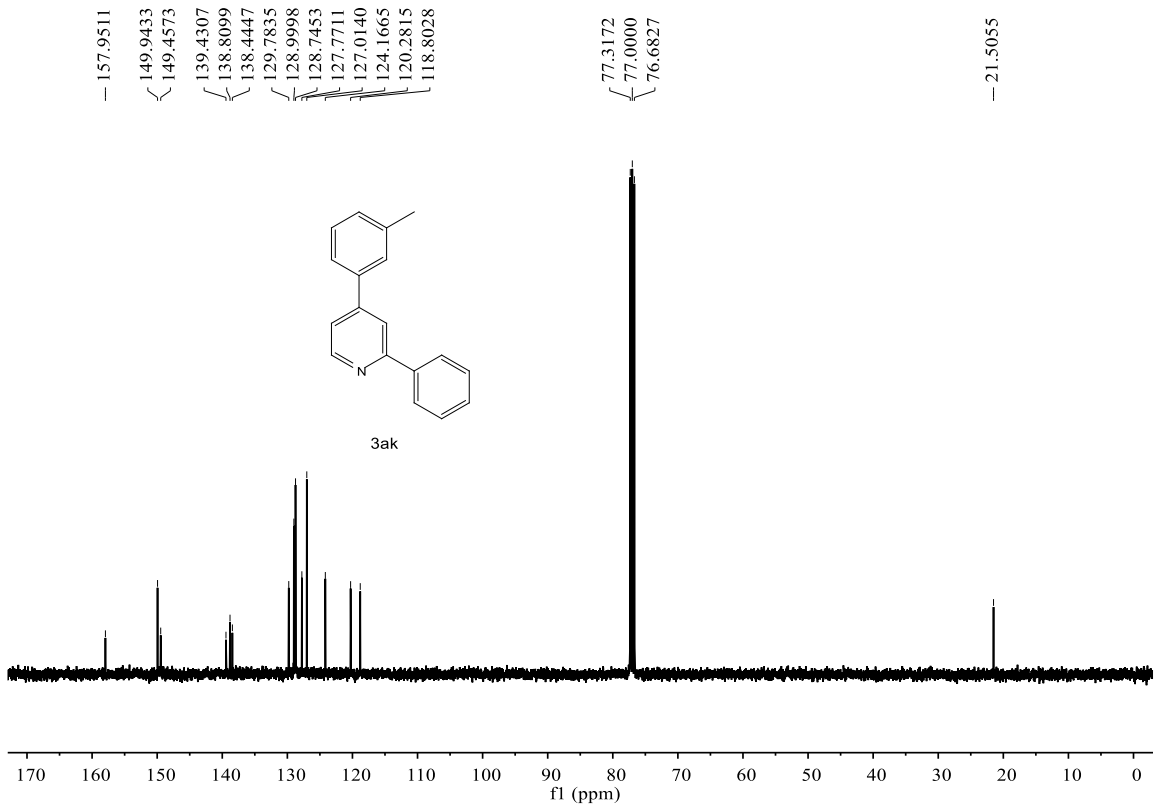

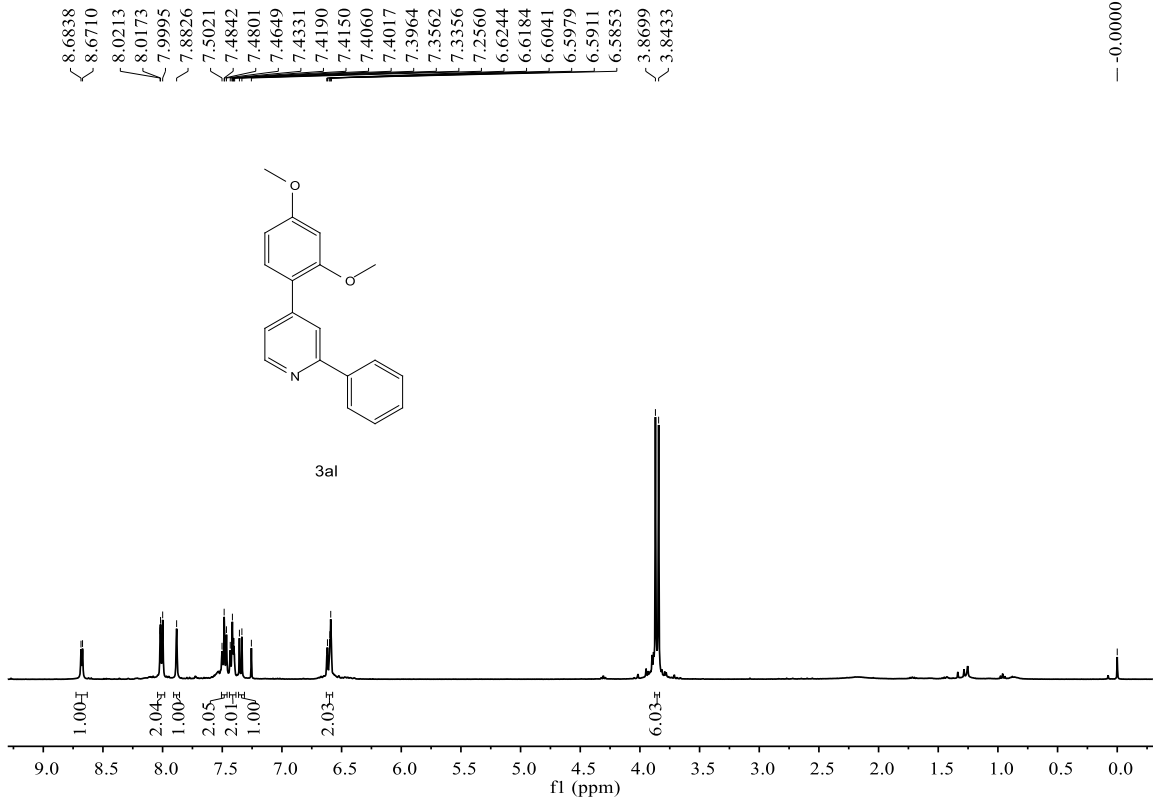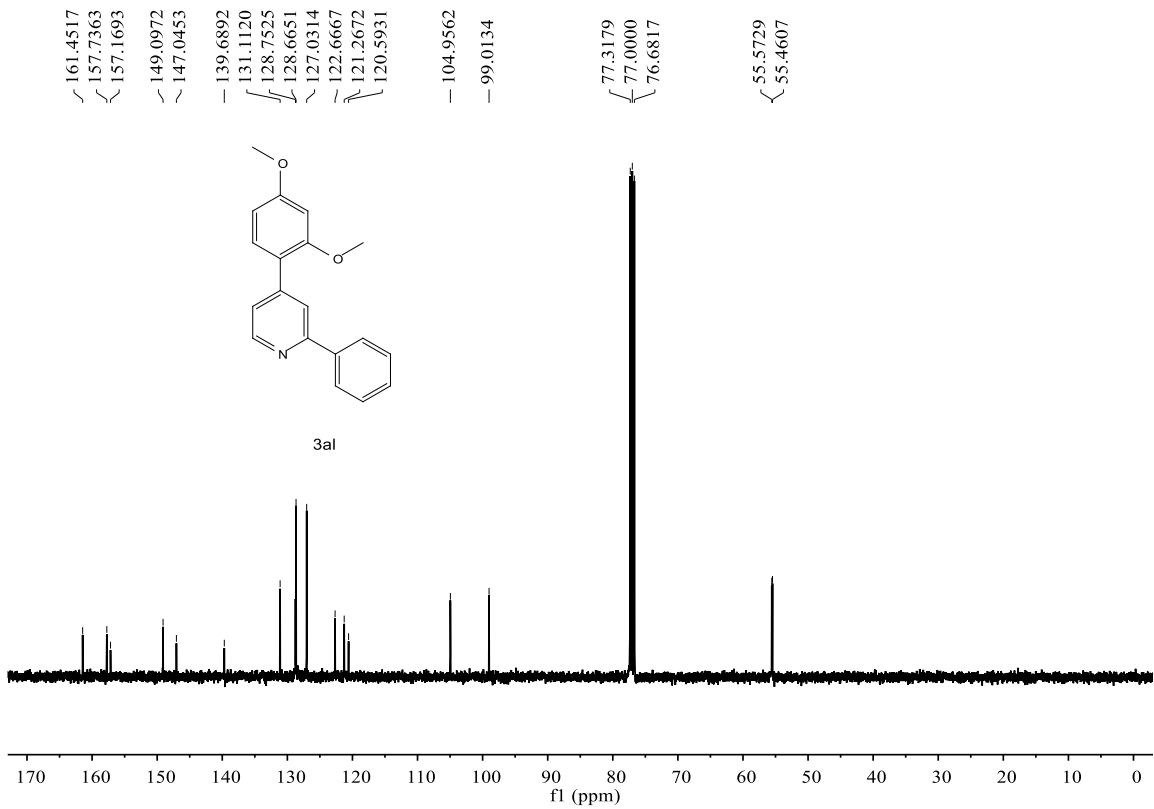

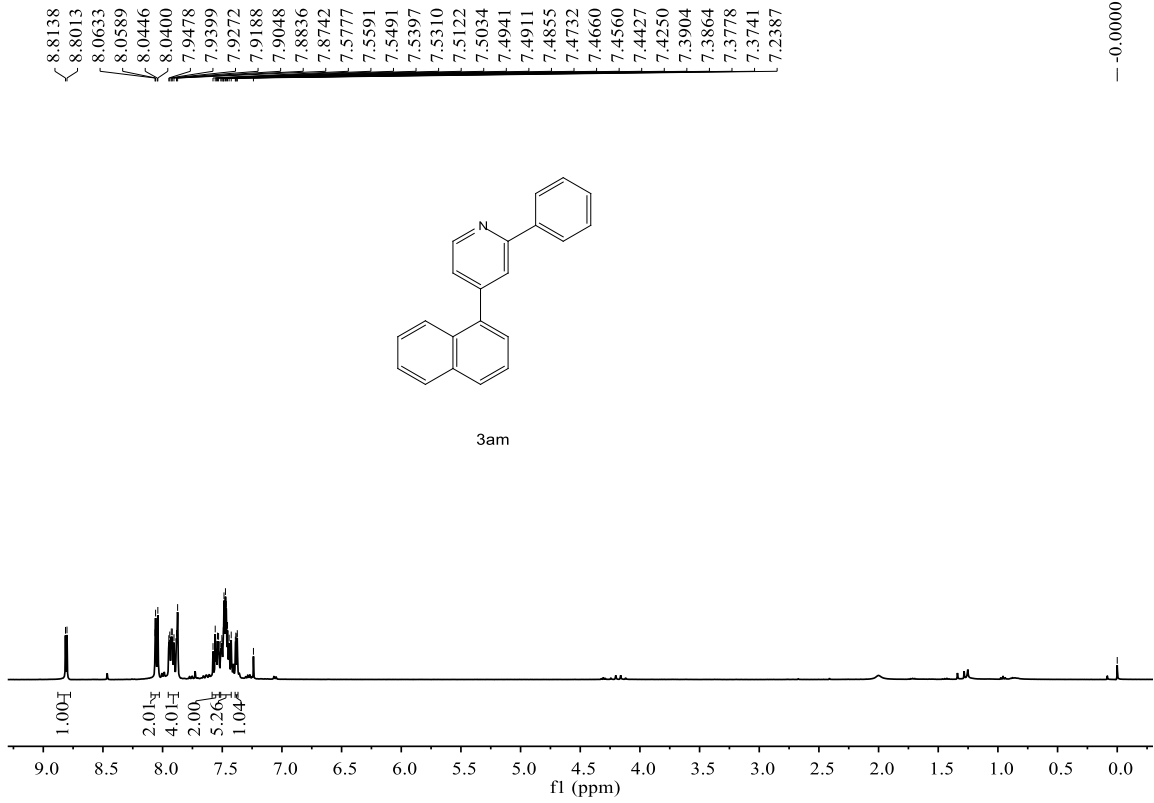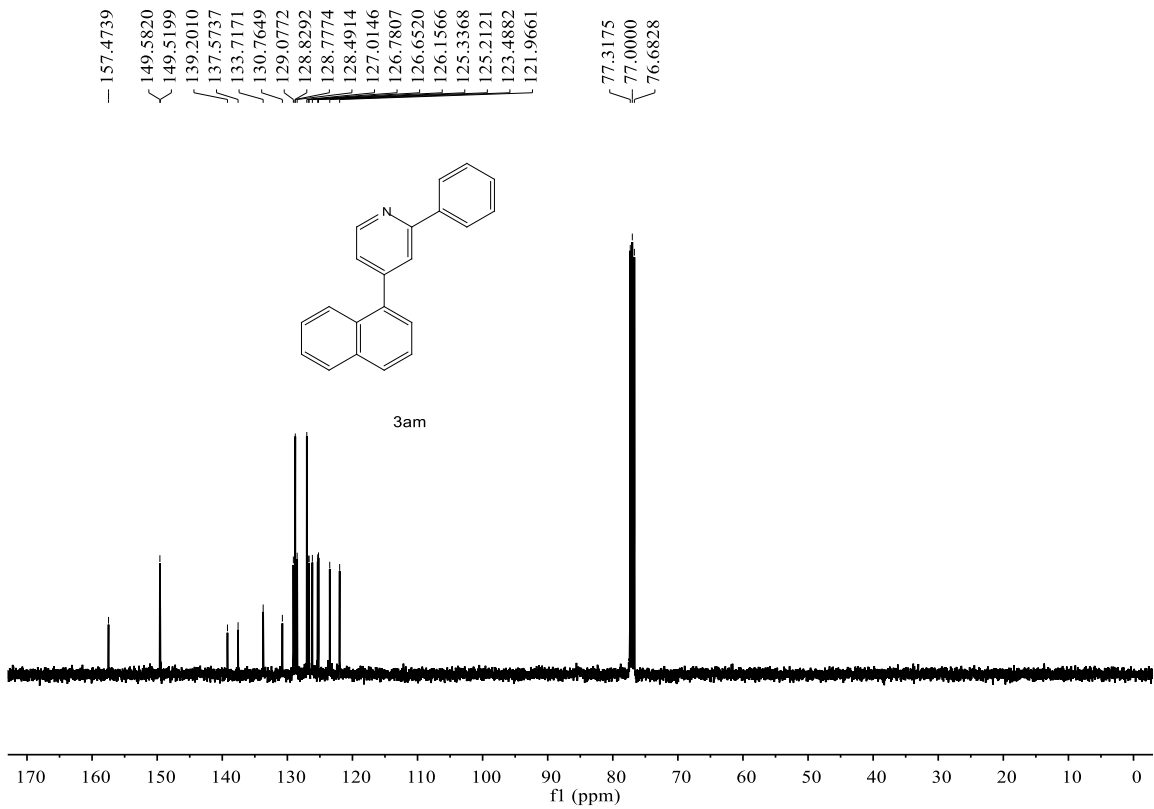

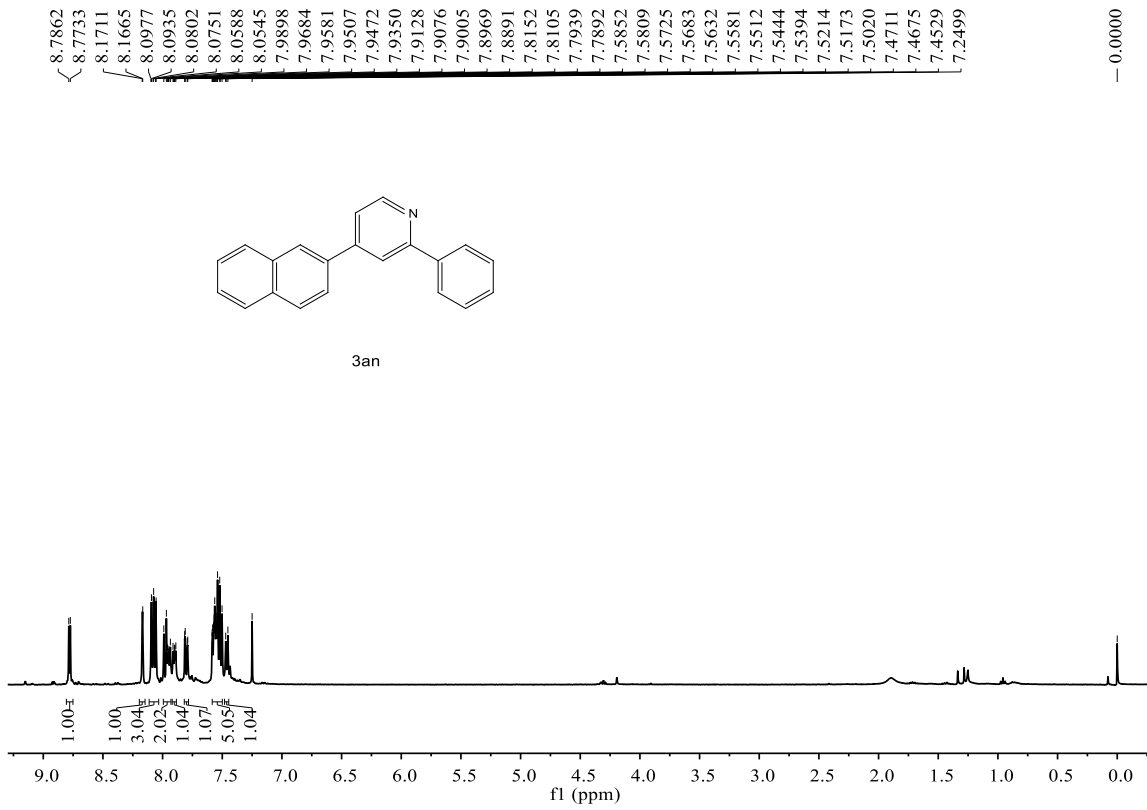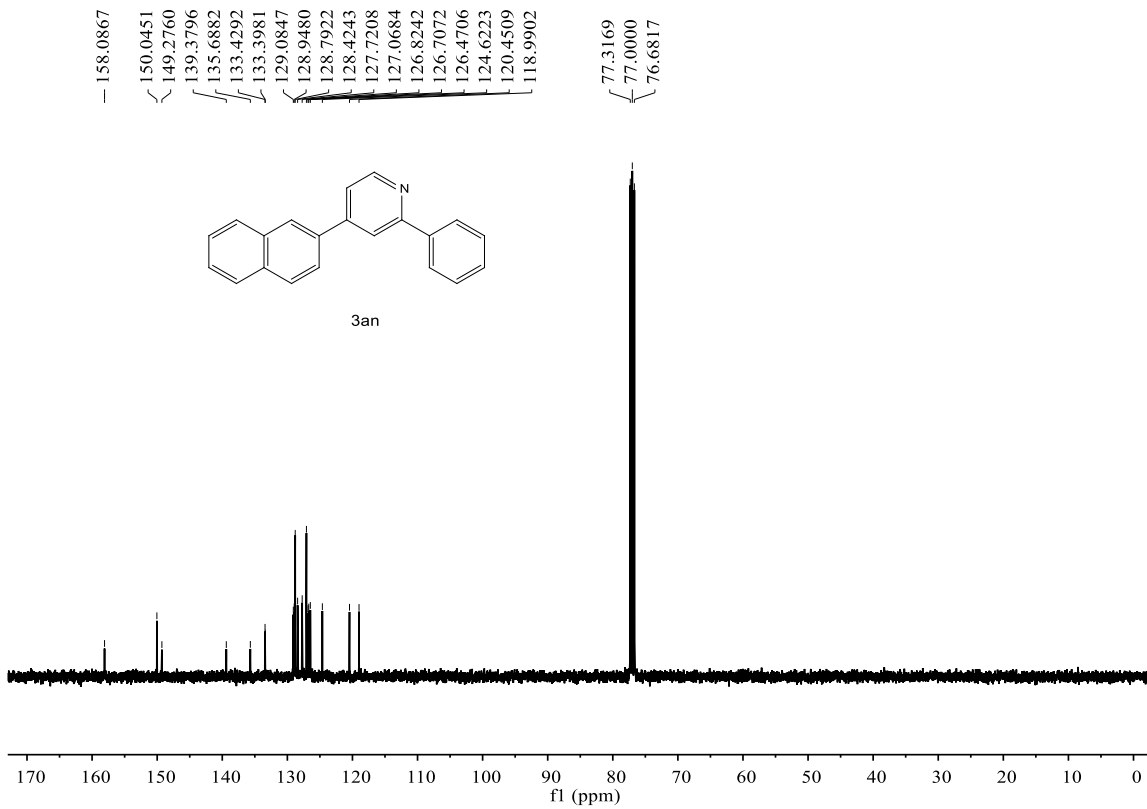

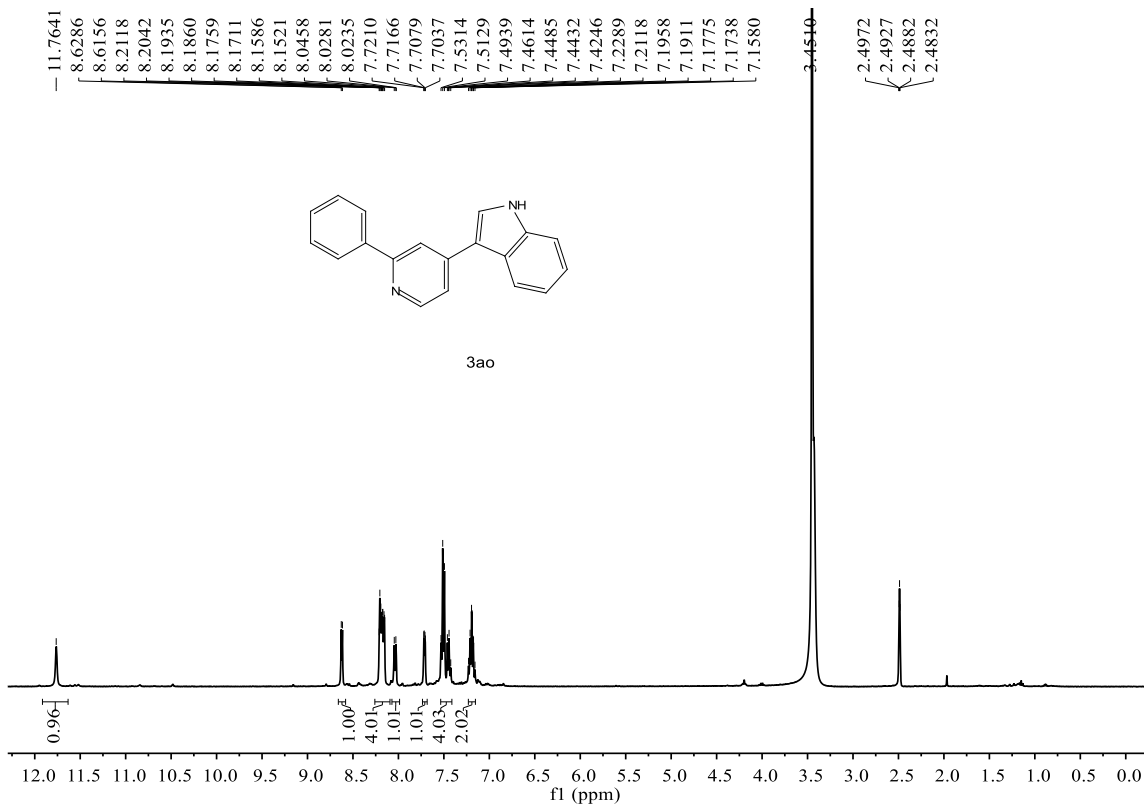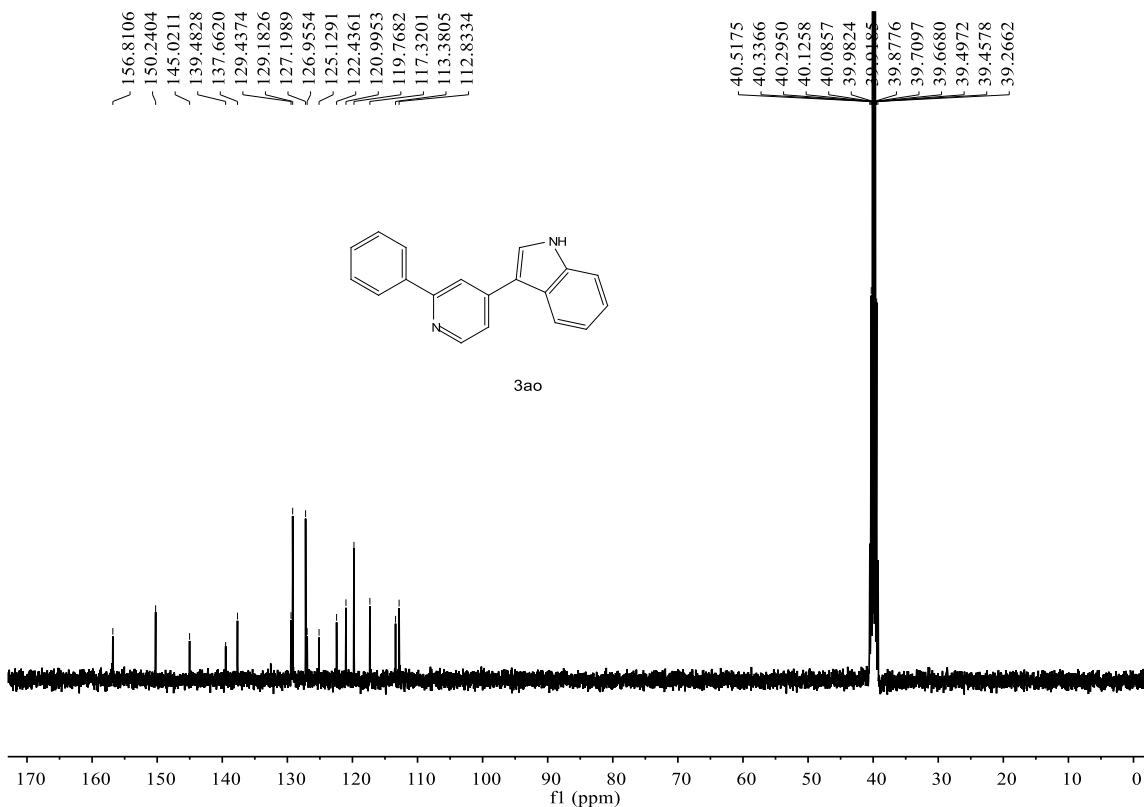

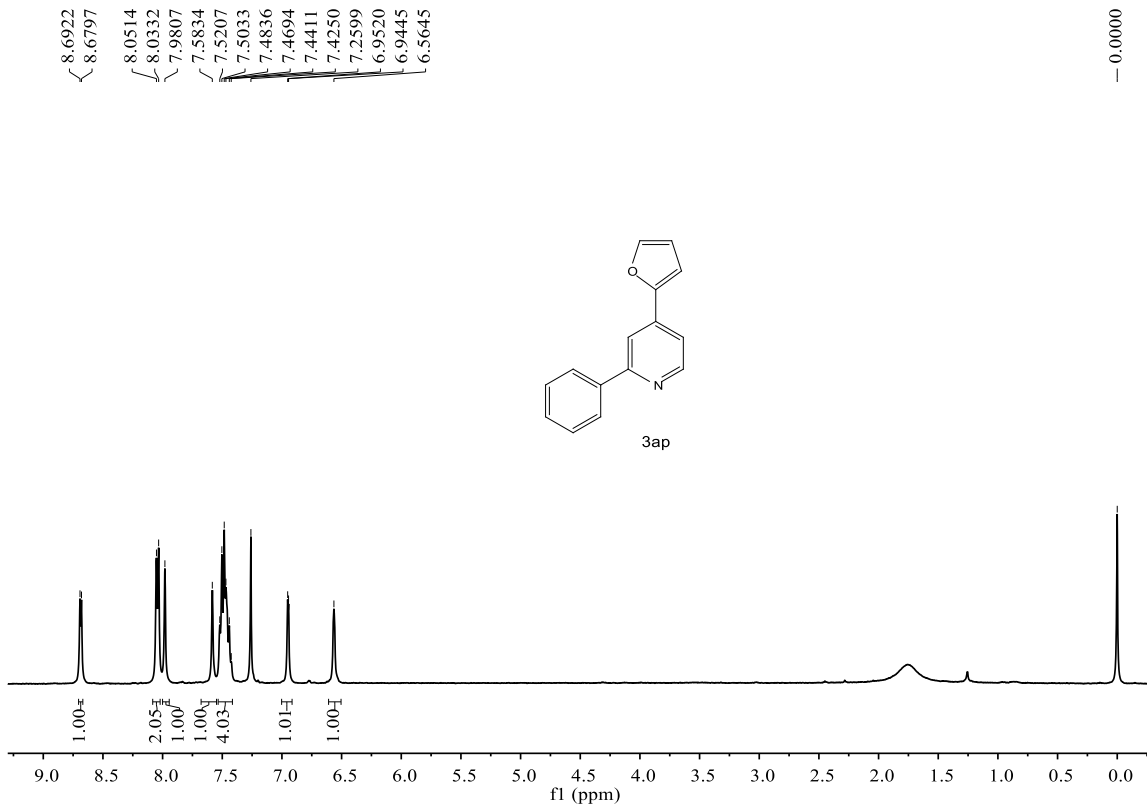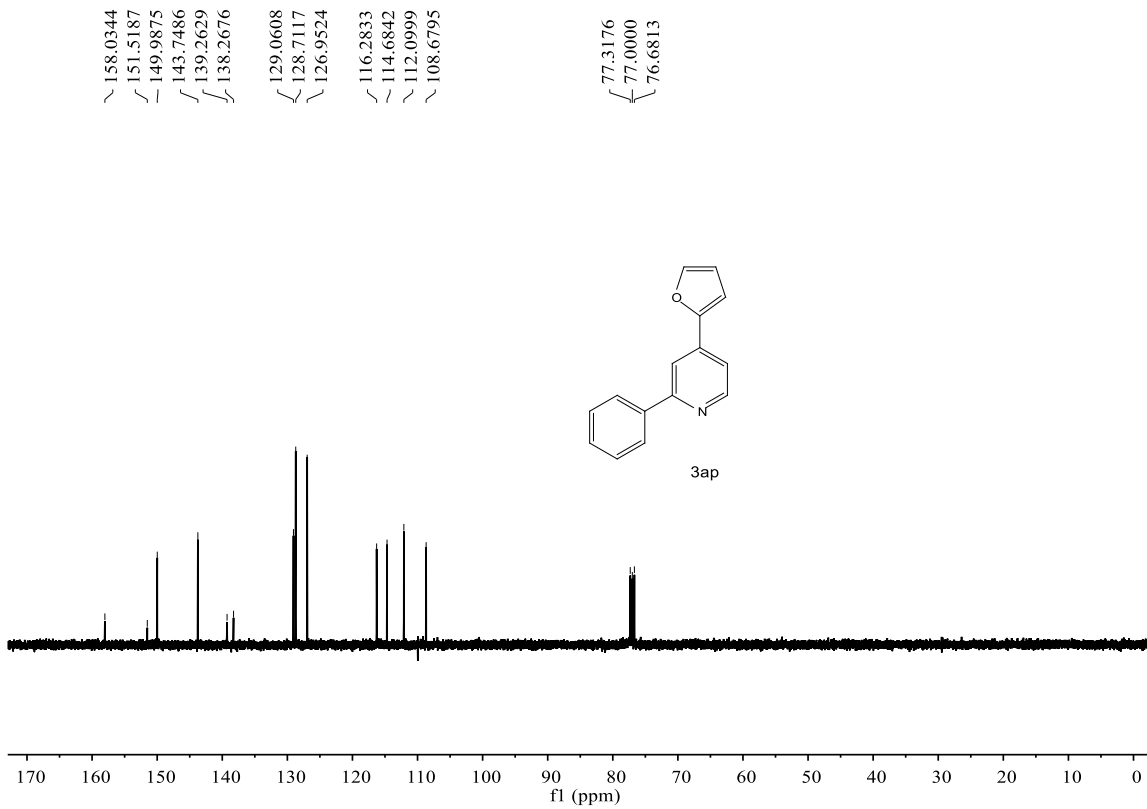

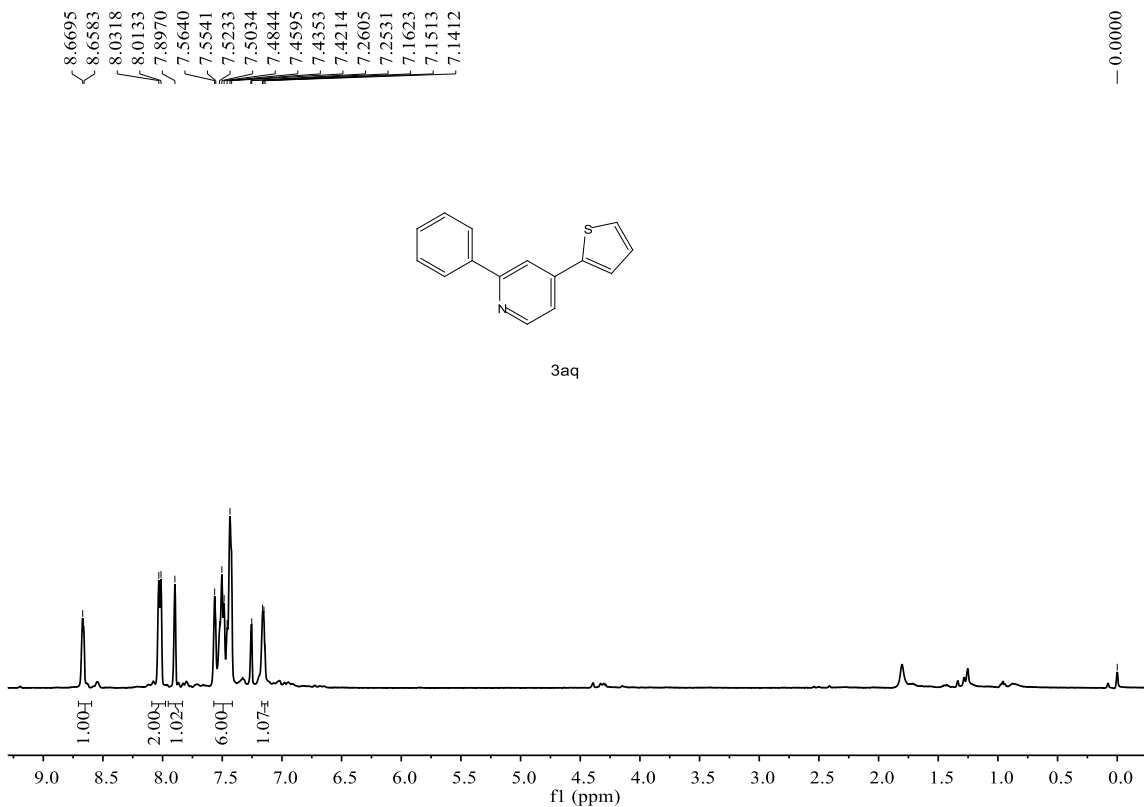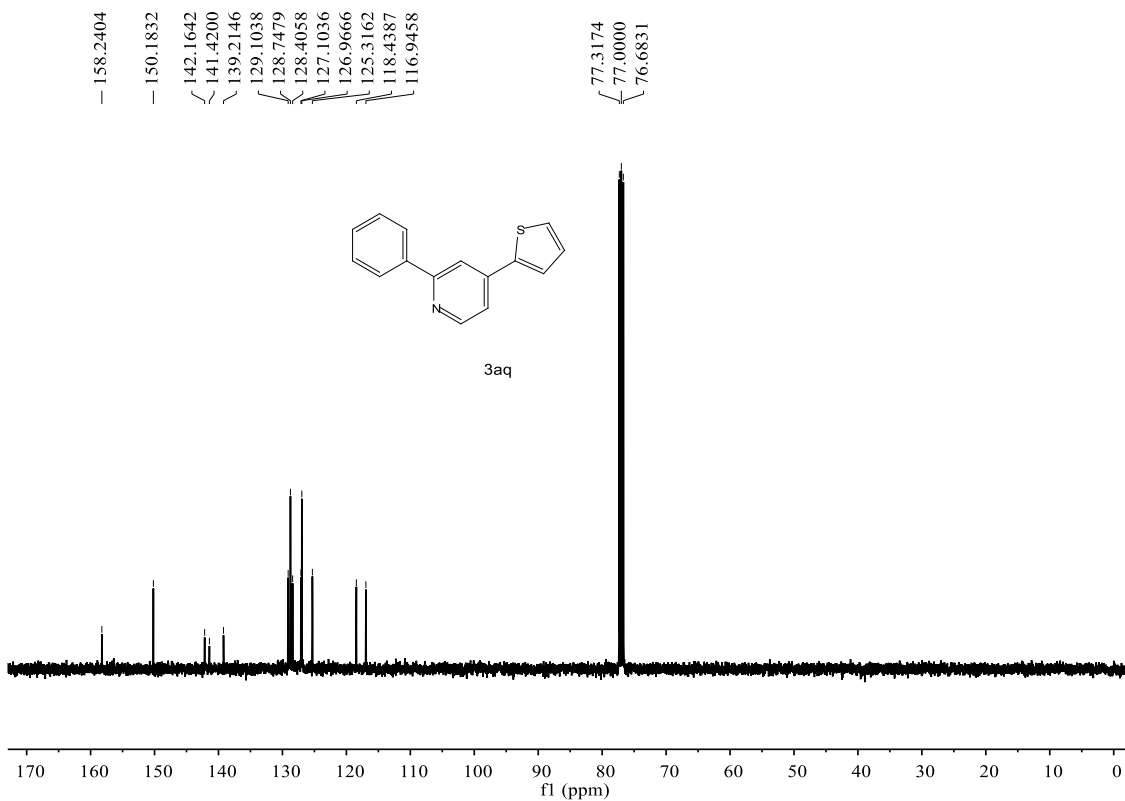

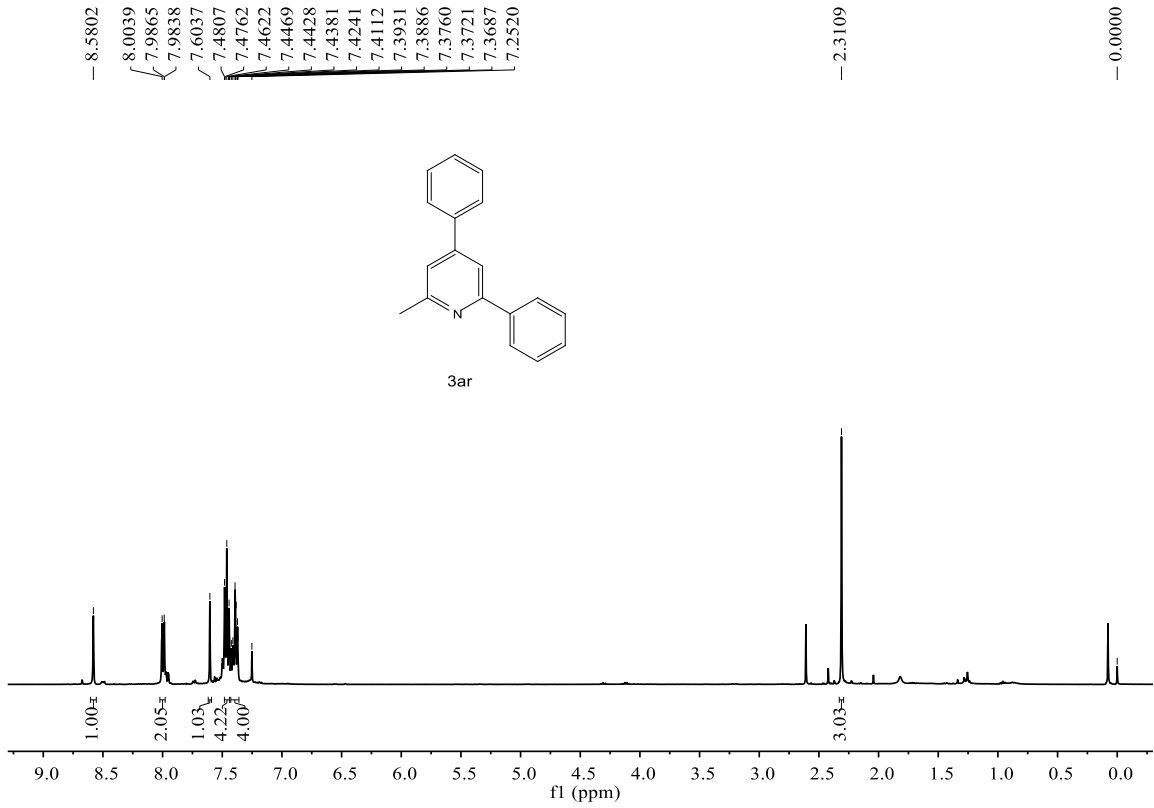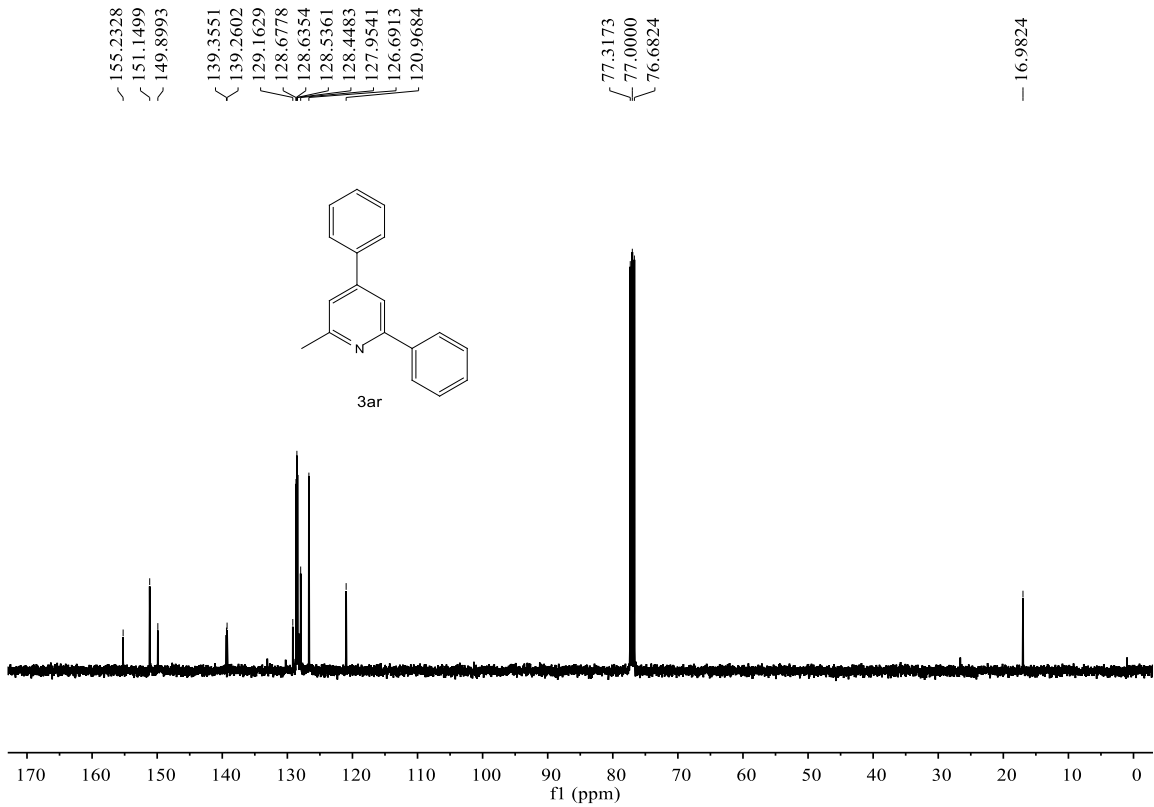



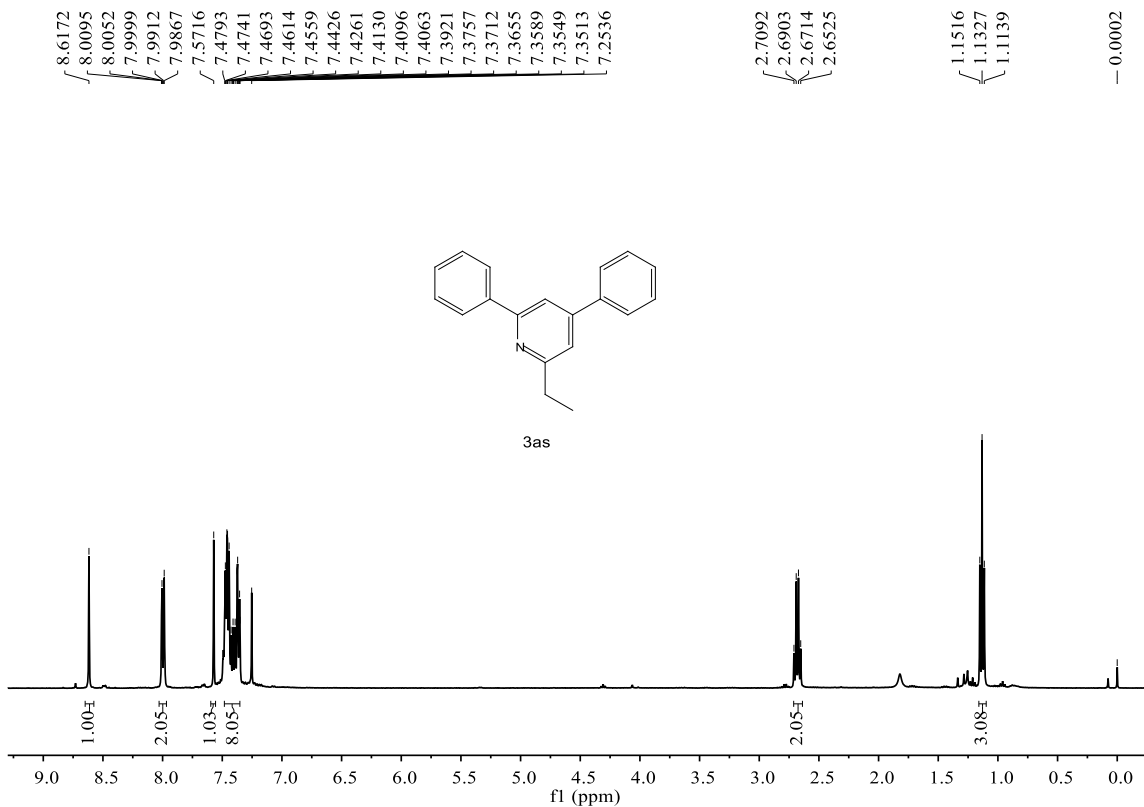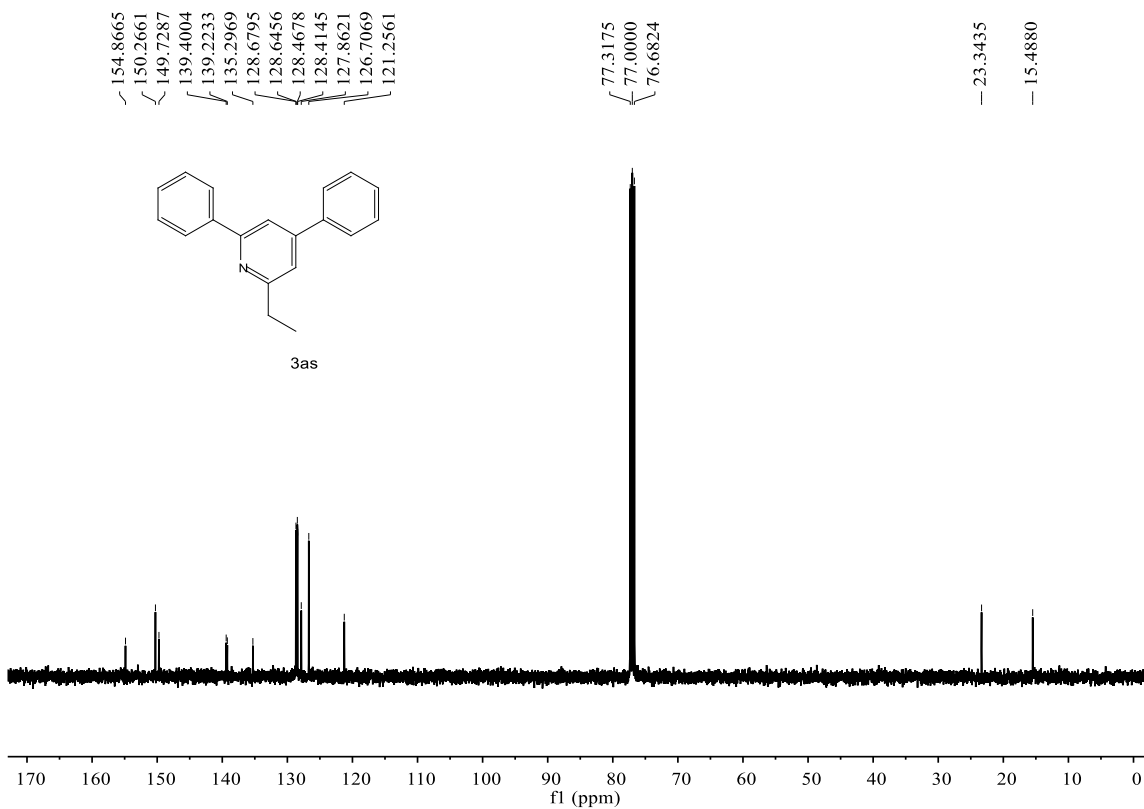

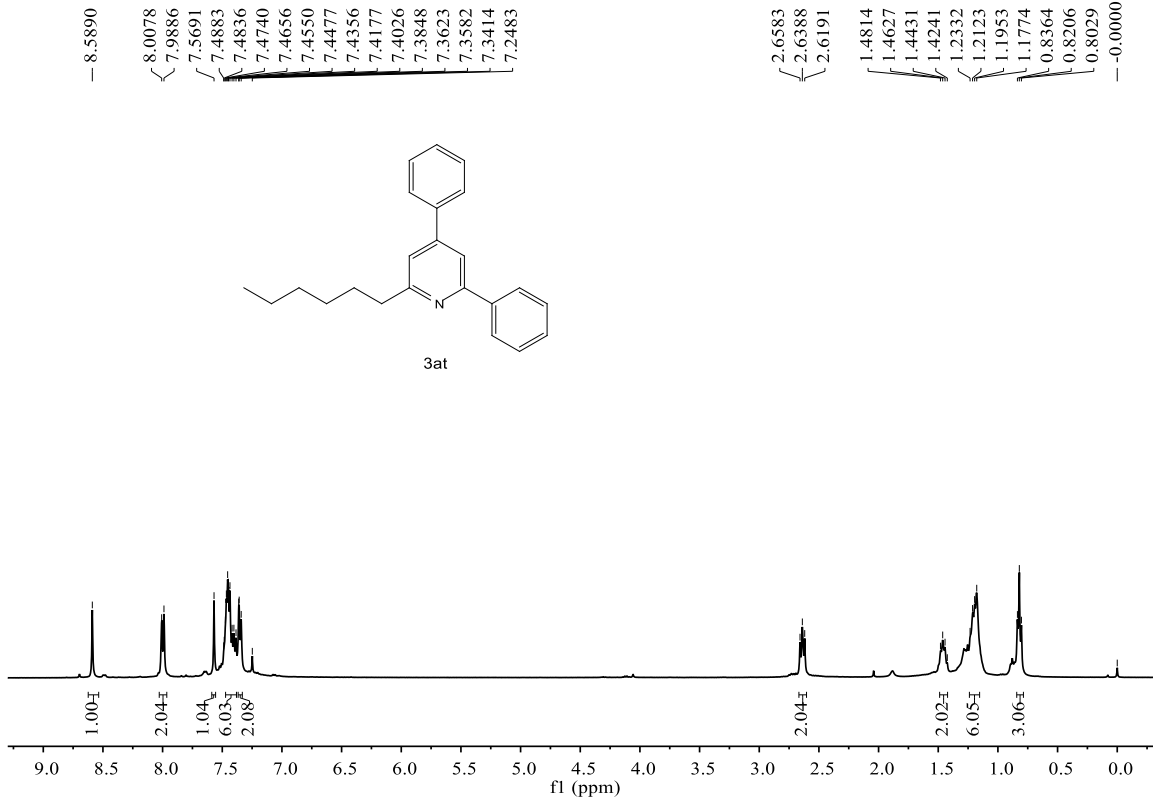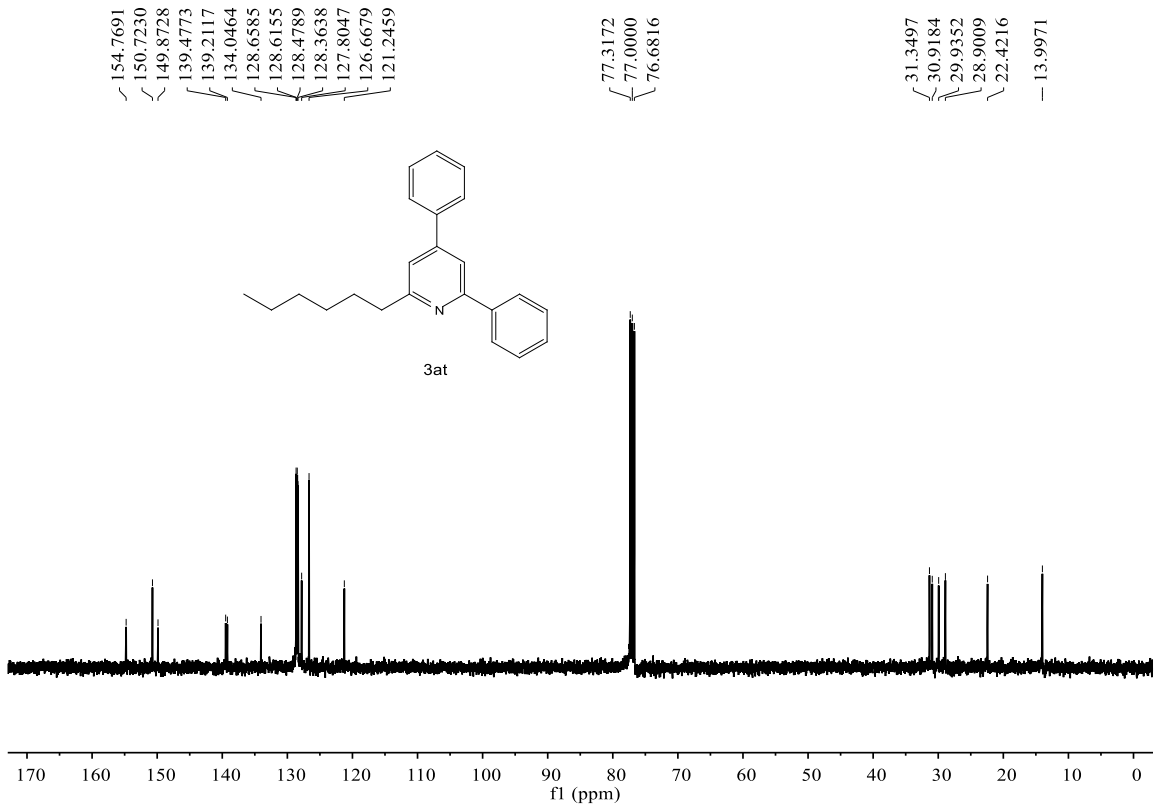

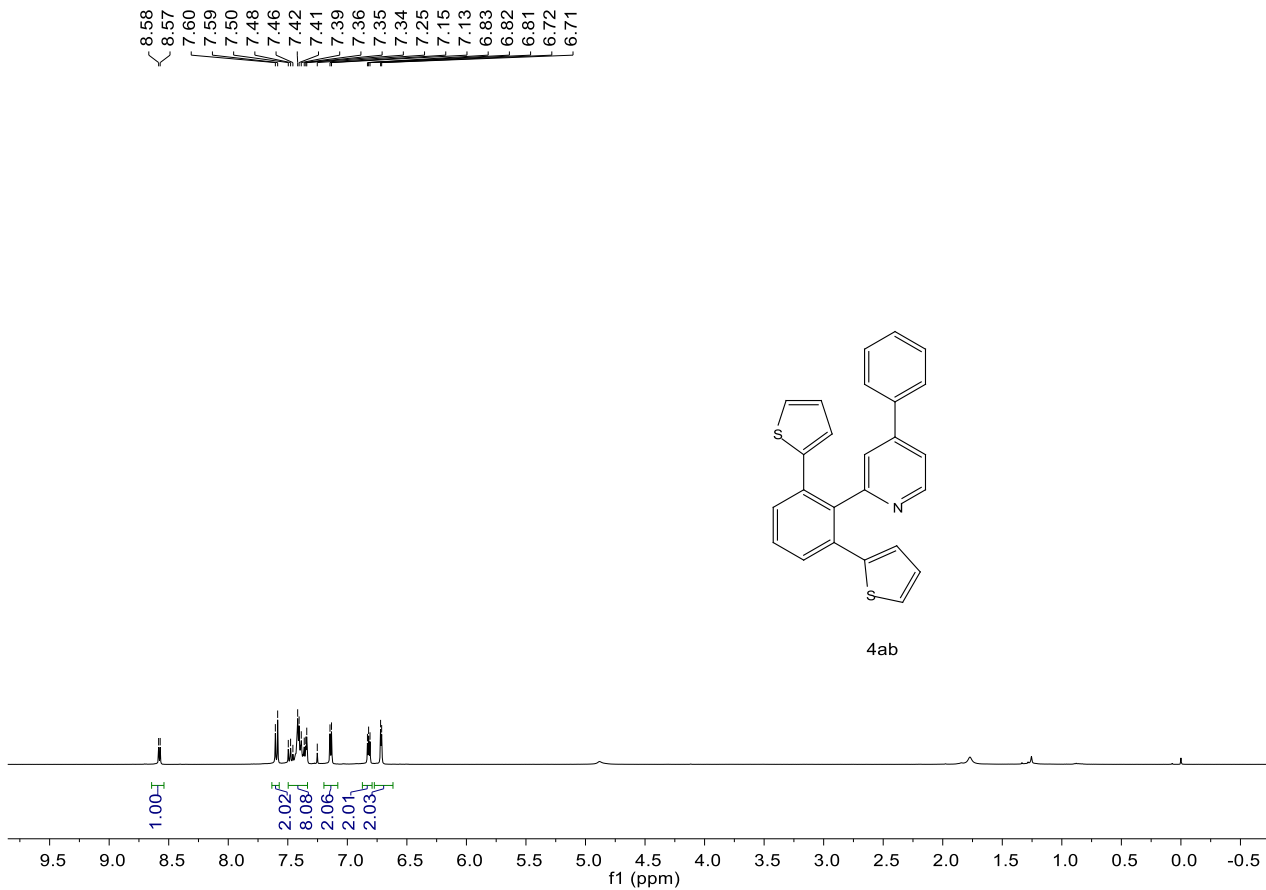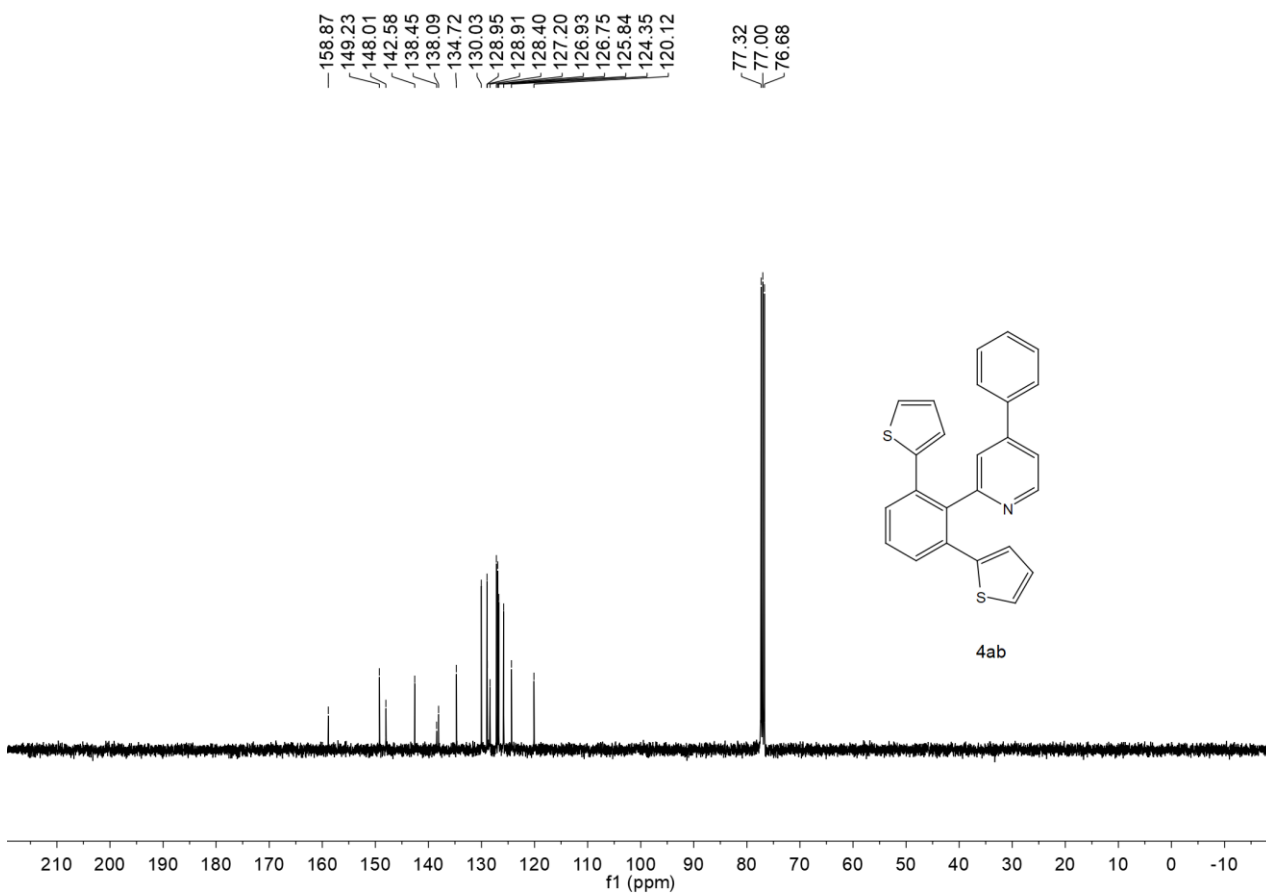

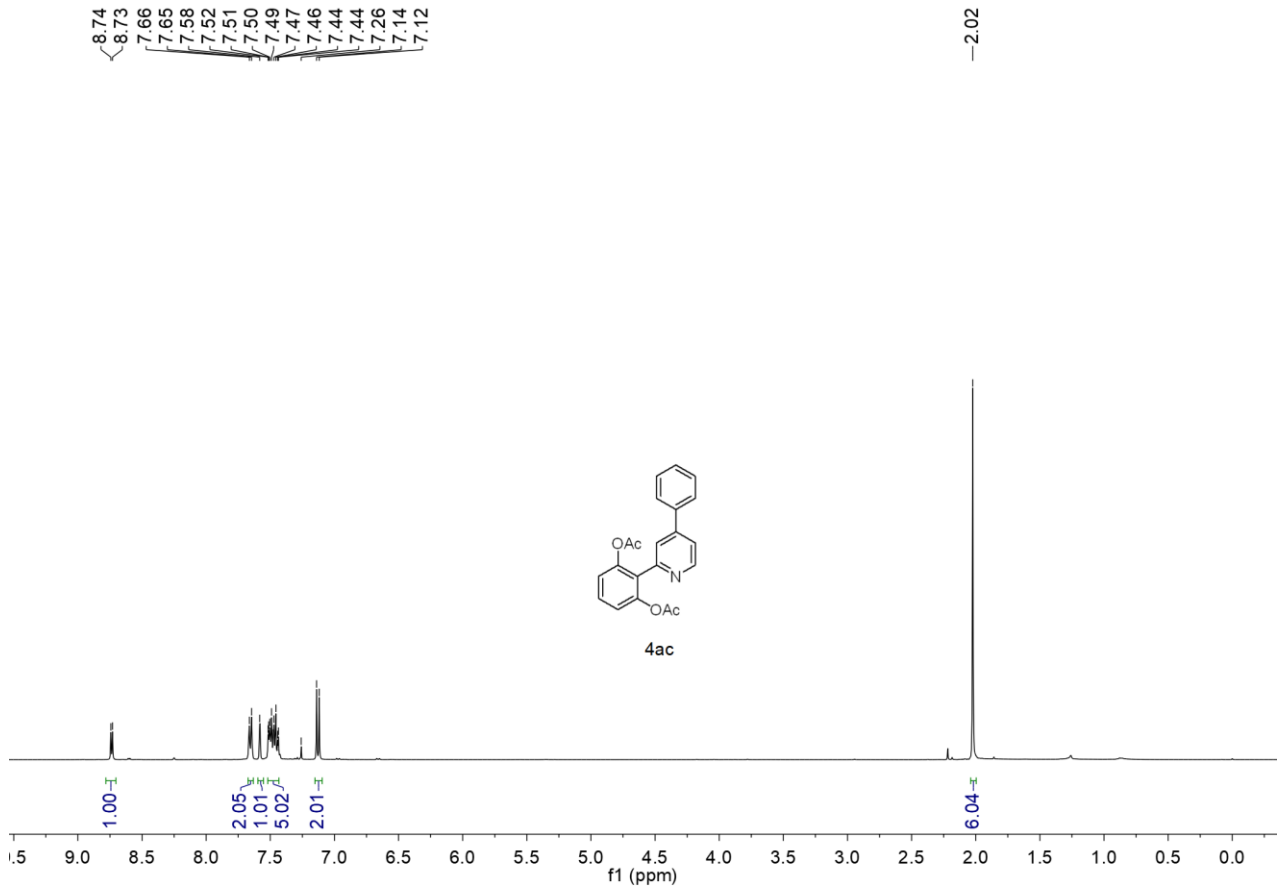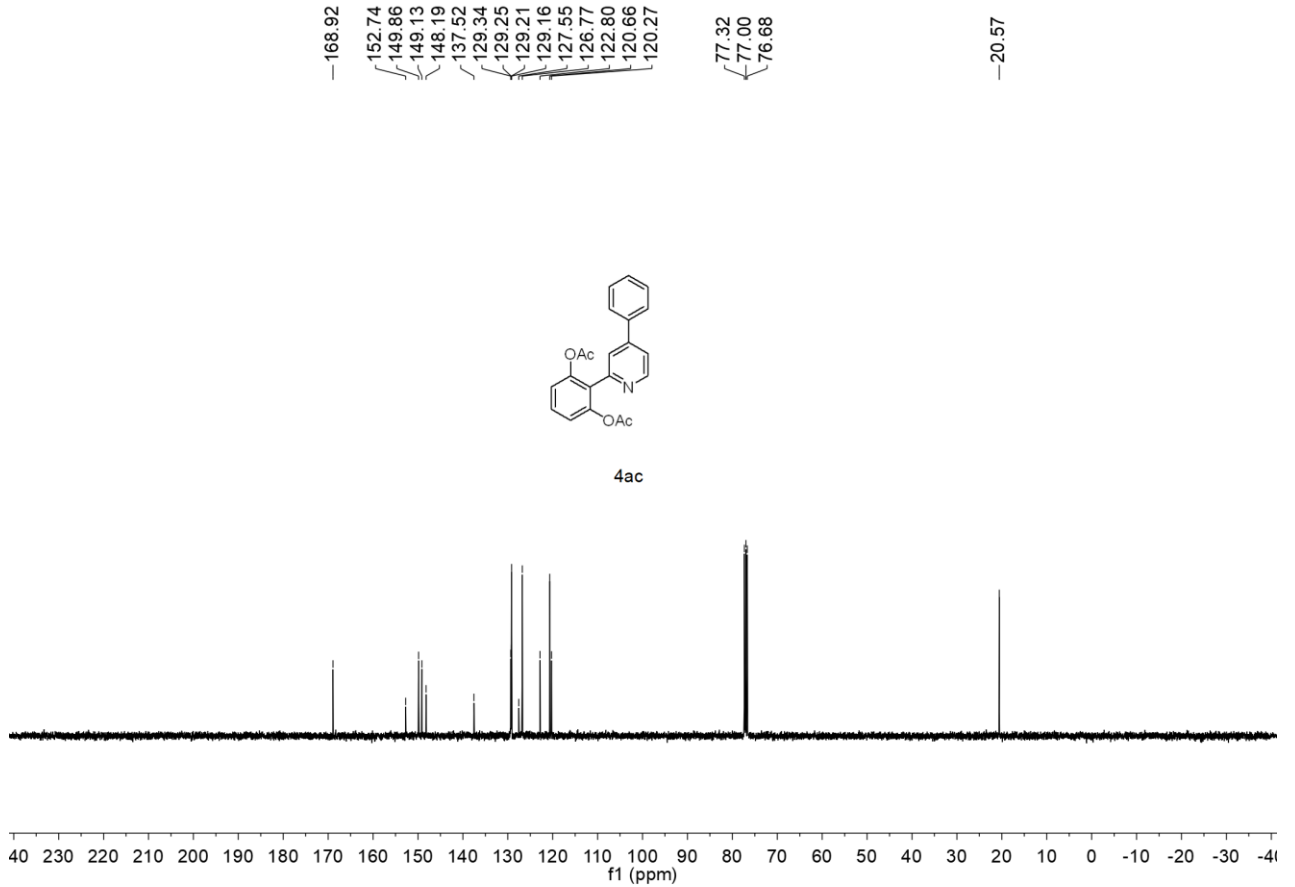

8.07  
8.05  
7.73  
7.61  
7.59  
7.50  
7.48  
7.46  
7.45  
7.43  
7.41  
7.40  
7.28  
7.27  
7.23  
7.14  
7.12

-4.25

-2.32

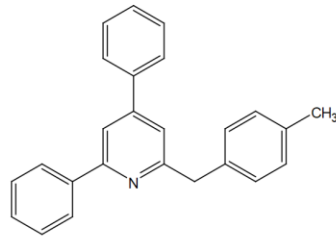

4ad

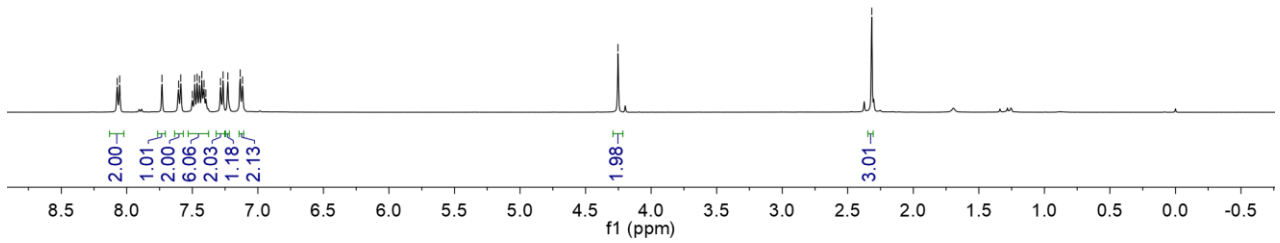

161.66  
157.46  
149.72  
139.73  
138.84  
136.57  
135.80  
129.22  
129.07  
128.94  
128.81  
128.78  
128.67  
127.12  
127.08  
119.49  
116.42

77.32  
77.00  
76.68

-44.53

-21.03

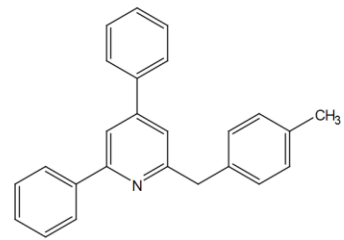

4ad

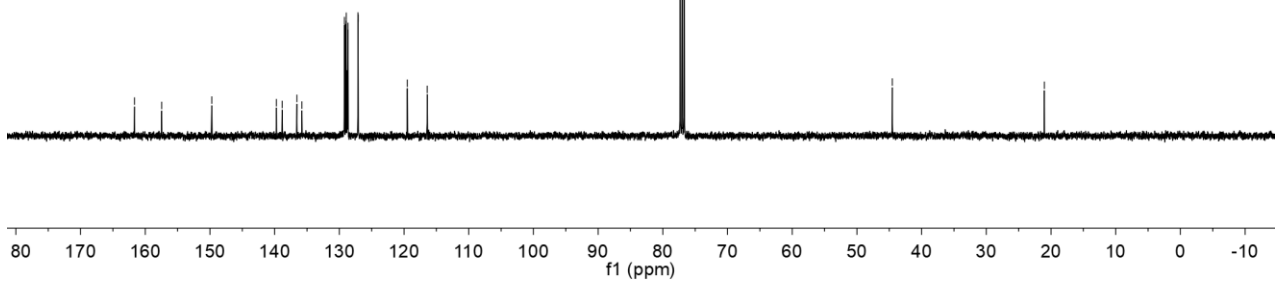

Supplement: d3qo00891f1.pdf [file d3qo00891f1.pdf]
